# Supplementary material
Source: PubMed Central journal article supplement (PMC470739)
Supplement: pnas_101_26_9704__2.pdf [file pnas_101_26_9704__2.pdf]

## A. Alignment for *H. erato* at the *Mpi* locus

```

#NEXUS
BEGIN DATA;
    DIMENSIONS  NTAX=74  NCHAR=607;
    FORMAT DATATYPE=DNA  MISSING=?  GAP=-  MATCHCHAR=.  INTERLEAVE ;
MATRIX
[
    10      20      30      40
[
    .      .      .      .      .
CHE2A_C140_A      TTTATCTATT  CAGGCTCATC  CAACTAAGGT  ATGTATCTAA  ATAAAAATTT
[50]
CHE2B_C140_B      .....
[50]
CHE4A_C201_A      .....G.....
[50]
CYR1A_N588_A      .....G.....A.....
[50]
CYR1B_N588_B      .....G.....G.....A.....
[50]
CYR2A_C2861#1     .....
[50]
CYR2B_C2861#2     .....
[50]
CYR3A_PR03_A      .....
[50]
CYR3B_PR03_B      .....
[50]
CYR5A_PR31_A      .....
[50]
CYR5B_PR31_B      .....
[50]
CYR6A_PR43_A      ?????????? ?????????? ??????.....
[50]
CYR6B_PR43_B      ?????????? ?????????? ??.....
[50]
PET1A_N7153_A     .....T.....--
[48]
PET1B_N7153_B     .....-
[49]
PET3A_N7183_A     .....
[50]
PET3B_N7183_B     .....A.....T.....--
[48]
PET4A_C2980_A     .....G.....-...
[49]
PET4B_C2980_B     .....A.....T.....----
[46]
PET7A_PR26_A      .....G.....
[50]
PET7B_PR26_B      .....
[50]
HYCO2A_C455_A     .....
[50]
HYCO2B_C455_B     .....A.....T.....--
[48]
HYCO3A_C456_A     .....A.....G.....T.....----
[46]
HYCO3B_C456_B     .....A.....T.....----
[46]
HYCO4A_C457_A     .....-
[49]
HYCO4B_C457_B     .....-
[48]
HYTT1A_TT05_A     .....
[50]
HYTT1B_TT05_B     ?????????? ?.....
[50]

```

|                |                                 |
|----------------|---------------------------------|
| HYTT4A_TT12_A  | .....A.....T.....--             |
| [48]           |                                 |
| HYTT4B_TT12_B  | .....--                         |
| [48]           |                                 |
| HYFG1A_C420_A  | .....T.....--                   |
| [48]           |                                 |
| HYFG2A_C440_A  | ???.A.....T.....--              |
| [48]           |                                 |
| HYFG3A_C442_A  | .....                           |
| [50]           |                                 |
| HYFG4A_C444_A  | ?????????.....                  |
| [50]           |                                 |
| ERA1A_C347_A   | .....A.....T.....--             |
| [48]           |                                 |
| ERA2A_C348_A   | ??????????? ?.....---           |
| [47]           |                                 |
| EMM1A_JM443_A  | .....--                         |
| [48]           |                                 |
| EMM1B_JM443_B  | .....--                         |
| [48]           |                                 |
| EMM2A_JM1105_A | .....T.....--                   |
| [48]           |                                 |
| EMM2B_JM1105_B | .....-                          |
| [49]           |                                 |
| ETY1A_N27_A    | .....A.....T.....--             |
| [48]           |                                 |
| ETY1B_N27_B    | .....A.....T.....--             |
| [48]           |                                 |
| ETY2A_N101_A   | .....-                          |
| [49]           |                                 |
| ETY2B_N101_B   | .....C.....                     |
| [50]           |                                 |
| ETY3A_PR05_A   | .....                           |
| [50]           |                                 |
| ETY3B_PR05_B   | .....A.....T.....---            |
| [47]           |                                 |
| ETY4A_PR06_A   | .....A.....T.....--             |
| [48]           |                                 |
| ETY4B_PR06_B   | .....A.....T.....--             |
| [48]           |                                 |
| FAV1A_JM488_A  | .....A.....T.....---            |
| [47]           |                                 |
| FAV2A_JM883_A  | .....A.....T.....--             |
| [48]           |                                 |
| FAV4A_JM1908_A | .....A.....T.....--             |
| [48]           |                                 |
| LAT1A_N2239_A  | .....C.....T.....--             |
| [48]           |                                 |
| LAT2A_Y30_A    | .....A.....T.....--             |
| [48]           |                                 |
| LAT2B_Y30_B    | .....A.....C.....T.....G.....-- |
| [48]           |                                 |
| LAT3A_Y31_A    | .....                           |
| [50]           |                                 |
| LAT3B_Y31_B    | .....C--                        |
| [48]           |                                 |
| LAT4A_Y34_A    | .....-                          |
| [49]           |                                 |
| LAT4B_Y34_B    | .....-                          |
| [49]           |                                 |
| NOT1A_PR12_A   | .....A.....T.....--             |
| [48]           |                                 |
| NOT3A_PR15_A   | .....                           |
| [50]           |                                 |
| NOT3B_PR15_B   | .....A.....T.....--             |
| [48]           |                                 |
| NOT4A_PR114_A  | .....                           |
| [50]           |                                 |
| NOT4B_PR114_B  | .....C.....--                   |
| [48]           |                                 |
| HIM1A_N620_A   | .....                           |
| [50]           |                                 |

```

HIM2A_C2842_1 .....
  [50]
HIM3A_PR18_A .....-
  [49]
HIM3B_PR18_B .....
  [50]
HIM4A_PR19_A .....
  [50]
HIM5A_PR45_A ??...G... .....
  [50]
HIM5B_PR45_B ??...G... .....G.....
  [50]
HIM6A_JM521_A .....G... .....
  [50]
HTELESIPHE_N11 .....A.....G.....--
  [48]
HCLYSONIMUS_C3037 .....A.C.....T.....--
  [48]

```

```

[          60          70          80          90
[          100]
[          .          .          .          .          .]

```

```

CHE2A_C140_A -AAAAAAA-- -----TG TTTTTA-TTC TTATCTCAAT CATTTAATAA
  [88]
CHE2B_C140_B -.....--- -----T .....TA... ..... T.....
  [88]
CHE4A_C201_A -.....--- -----.....-.....
  [88]
CYR1A_N588_A -.....--- -----C. ....T-CC. ....
  [87]
CYR1B_N588_B -.....--- -----C. ....T-CC. ....
  [87]
CYR2A_C2861#1 -.....--- -----.....-.....
  [88]
CYR2B_C2861#2 -.....--- -----C. ..G..T-.C. .... S.....
  [88]
CYR3A_PR03_A -.....--- -----C. ..G..T-.C. .... A.....
  [88]
CYR3B_PR03_B -.....--- -----C. ..G..T-.C. .... A.....
  [88]
CYR5A_PR31_A -.....--- -----C. ....T-CC. ....C....
  [87]
CYR5B_PR31_B -.....--- -----.....-.....
  [88]
CYR6A_PR43_A -.....--- -----.....-.....
  [88]
CYR6B_PR43_B -.....--- -----C. ..G..T-.C. .... A.....
  [88]
PET1A_N7153_A -.....--- -----..A..TC.C. ....
  [87]
PET1B_N7153_B -.....A- -----.....T-.C. ....
  [87]
PET3A_N7183_A T.....--- -----C....T-.C. ....
  [86]
PET3B_N7183_B -.....--- -----..A..TC.C. ....C..
  [87]
PET4A_C2980_A -.....--- -----C. ....T-CC. ....
  [87]
PET4B_C2980_B -----A..A.TC.C. ....
  [77]
PET7A_PR26_A -.....--- -----C. ....T-CC. ....
  [87]
PET7B_PR26_B -.....AA -----C....T-.C. A.....
  [88]
HYCO2A_C455_A T.....--- -----C....T-.C. ....
  [87]
HYCO2B_C455_B -.....AA A-----..A..TC.C. ....
  [90]
HYCO3A_C456_A -----CAA.. ..A..TC.C. ....
  [81]

```

|                        |                                       |
|------------------------|---------------------------------------|
| HYCO3B_C456_B<br>[81]  | -----CAAA...A..TC.C. ....             |
| HYCO4A_C457_A<br>[86]  | -----C. ....T-.C. ....A.....          |
| HYCO4B_C457_B<br>[89]  | .....AA -----CC. ....T-.C. ....       |
| HYTT1A_TT05_A<br>[87]  | T.....-- -----C....T-.C. ....         |
| HYTT1B_TT05_B<br>[87]  | .....A- -----C....T-.C. ....          |
| HYTT4A_TT12_A<br>[89]  | .....AA -----...A..TC.C. ....         |
| HYTT4B_TT12_B<br>[88]  | .....AA -----C. ....T-.C. ....        |
| HYFG1A_C420_A<br>[89]  | .....AA -----...A..TC.C. ....         |
| HYFG2A_C440_A<br>[87]  | -----...A..TC.C. ....                 |
| HYFG3A_C442_A<br>[88]  | -----C. ....T-.C. ....                |
| HYFG4A_C444_A<br>[87]  | T.....-- -----C....T-.C. ....         |
| ERA1A_C347_A<br>[88]   | .....A- -----...A..TC.C. ....C..      |
| ERA2A_C348_A<br>[85]   | -----...T-.C. ....A.....              |
| EMM1A_JM443_A<br>[88]  | .....AA -----CG. ....TC--.            |
| EMM1B_JM443_B<br>[88]  | .....AA -----C. ....T-.C. ....        |
| EMM2A_JM1105_A<br>[87] | .....A- -----T...A..TC.C. ....        |
| EMM2B_JM1105_B<br>[88] | .....A- -----C. ....T-.C. ....        |
| ETY1A_N27_A<br>[89]    | .....AA TATAA-----...TC.C. ....       |
| ETY1B_N27_B<br>[89]    | ...C...AA TATAA-----...TC.C. ....     |
| ETY2A_N101_A<br>[86]   | .....A- -----C....T-.C. ....A....T... |
| ETY2B_N101_B<br>[88]   | -----C. ....T-.C. ....                |
| ETY3A_PR05_A<br>[87]   | .....A- -----C....T-.C. ....          |
| ETY3B_PR05_B<br>[85]   | -----...A..TC.C. ....                 |
| ETY4A_PR06_A<br>[88]   | .....A- -----...C..TC.C. ....         |
| ETY4B_PR06_B<br>[88]   | .....A- -----...A..TC.C. ....         |
| FAV1A_JM488_A<br>[84]  | -----...A..TC.C. ....                 |
| FAV2A_JM883_A<br>[90]  | .....AA A-----...A..TC.C. ....        |
| FAV4A_JM1908_A<br>[90] | .....AA A-----...A..TC.C. ....        |
| LAT1A_N2239_A<br>[88]  | .....A- TAATAA-----...TC.C. ....      |
| LAT2A_Y30_A<br>[89]    | .....AA -----...A..TC.C. ....         |
| LAT2B_Y30_B<br>[89]    | .....AA -----...A..TC.C. ....         |
| LAT3A_Y31_A<br>[88]    | -----                                 |
| LAT3B_Y31_B<br>[87]    | .....AA A-----C....T-.C. ....         |
| LAT4A_Y34_A<br>[88]    | .....A- -----C. ....T-.C. ....        |
| LAT4B_Y34_B<br>[91]    | .....AA AA-----C. ....T-.C. ....C     |
| NOT1A_PR12_A<br>[89]   | .....AA -----...A..TC.C. ....         |

NOT3A\_PR15\_A [88] -.....-- -----C. ....T-.C. ....  
 NOT3B\_PR15\_B [89] -.....AA -----..A..TC.C. ....  
 NOT4A\_PR114\_A [88] -.....-- -----C. ....T-.C. ....  
 NOT4B\_PR114\_B [85] -.....-- -----C. ....T-.C. ....  
 HIM1A\_N620\_A [88] -.....-- -----C. ....T-.CT .....  
 HIM2A\_C2842\_1 [88] -.....-- -----C. ....T-.CT .....  
 HIM3A\_PR18\_A [89] -.....AA -----C. ....T-.CT .....  
 HIM3B\_PR18\_B [88] -.....-- -----C. ....T-.CT .....  
 HIM4A\_PR19\_A [88] -.....-- -----C. ....T-.CT .....  
 HIM5A\_PR45\_A [87] -.....-- -----C. ....T-CC. ....  
 HIM5B\_PR45\_B [87] -.....-- -----C. ....T-CC. ....  
 HIM6A\_JM521\_A [87] -.....-- -----C. ....T-CC. ....  
 HTELESIPHE\_N11 [89] -.....GA -----..G..TC.C..G.....  
 HCLYSONIMUS\_C3037 [88] -.....A- -----..AC.TC.C..G.....

[ 110 120 130 140  
 [ 150 ]  
 [ . . . . ]

CHE2A\_C140\_A [134] TGTGTCATAA GATAT---A CTTATAAACA AATACAAAAC AATACGATCA  
 CHE2B\_C140\_B [134] .....  
 CHE4A\_C201\_A [134] .....  
 CYR1A\_N588\_A [137] ....G.... TCTT. ....T.GC..  
 CYR1B\_N588\_B [137] ....G.... TCTT. ....T.GC..  
 CYR2A\_C2861#1 [134] .....  
 CYR2B\_C2861#2 [138] ....TCTT. ....G...T.GC..  
 CYR3A\_PR03\_A [138] ....TCTT. ....G...T.GC..  
 CYR3B\_PR03\_B [138] ....TCTT. ....G...T.GC..  
 CYR5A\_PR31\_A [137] ....G.... TCTT. ....T.GC..  
 CYR5B\_PR31\_B [134] ..... A....  
 CYR6A\_PR43\_A [134] ..... A....  
 CYR6B\_PR43\_B [138] ....TCTT. ....G...T.GC..  
 PET1A\_N7153\_A [133] ..... T.GC..  
 PET1B\_N7153\_B [137] ....TCTT. ....T.GC..  
 PET3A\_N7183\_A [136] ....TCTT. ....GC..  
 PET3B\_N7183\_B [133] ....T.... T....GC..  
 PET4A\_C2980\_A [137] ....G.... TCTT. ....T.GC..  
 PET4B\_C2980\_B [123] ...T.... T....A.C..

PET7A\_PR26\_A .....G.....TCTT.....T.GC..  
 [137]  
 PET7B\_PR26\_B .....TCTT.....C..  
 [138]  
 HYCO2A\_C455\_A .....TCTT.....GC..  
 [137]  
 HYCO2B\_C455\_B .A.....----. ....T.G...  
 [136]  
 HYCO3A\_C456\_A .....----. ....T. ....G..GC..  
 [127]  
 HYCO3B\_C456\_B .....----. ....T. ....GC..  
 [127]  
 HYCO4A\_C457\_A .....TCTT.....T.GC..  
 [136]  
 HYCO4B\_C457\_B .....TCTT.....C..  
 [139]  
 HYTT1A\_TT05\_A .....TCTT.....GC..  
 [137]  
 HYTT1B\_TT05\_B .....TCTT.....GC..  
 [137]  
 HYTT4A\_TT12\_A .....----. ....T.G...  
 [135]  
 HYTT4B\_TT12\_B .....TCTT.....GC..  
 [138]  
 HYFG1A\_C420\_A .....----. ....T.GC..  
 [135]  
 HYFG2A\_C440\_A G.....----. ....T. ....AGC..  
 [133]  
 HYFG3A\_C442\_A .....TCTT.....T.GC..  
 [138]  
 HYFG4A\_C444\_A .....TCTT.....GC..  
 [137]  
 ERA1A\_C347\_A .....T.....----. ....T. ....GC..  
 [134]  
 ERA2A\_C348\_A .....TCTT. T.....GC..  
 [135]  
 EMM1A\_JM443\_A .....ACTT.....GC..  
 [138]  
 EMM1B\_JM443\_B .....ACTT.....G...  
 [138]  
 EMM2A\_JM1105\_A .....----. ....T.GC..  
 [133]  
 EMM2B\_JM1105\_B .....A.....TCTT.....GC..  
 [138]  
 ETY1A\_N27\_A .....----. ....T.G...  
 [135]  
 ETY1B\_N27\_B .....G.....----. ....T.G...  
 [135]  
 ETY2A\_N101\_A .....TCTT.....GC..  
 [136]  
 ETY2B\_N101\_B .A.A.....TCTT.....T.GC..  
 [138]  
 ETY3A\_PR05\_A .....TCTT.....GC..  
 [137]  
 ETY3B\_PR05\_B .....----. ....T.G...  
 [131]  
 ETY4A\_PR06\_A .....----. ....T. ....AGC..  
 [134]  
 ETY4B\_PR06\_B .....----. ....T. ....AGC..  
 [134]  
 FAV1A\_JM488\_A .....----. ....T.G...  
 [130]  
 FAV2A\_JM883\_A .....G.....----. ....T.G...  
 [136]  
 FAV4A\_JM1908\_A .....G.....----. ....T.G...  
 [136]  
 LAT1A\_N2239\_A ..T.....----. ....T.G...  
 [134]  
 LAT2A\_Y30\_A .....----. ....T.G...  
 [135]  
 LAT2B\_Y30\_B .....----. ....G.....T.G...  
 [135]

LAT3A\_Y31\_A ..... ----. ....  
 [134]  
 LAT3B\_Y31\_B ..... TCTT. .... C.AGC..  
 [137]  
 LAT4A\_Y34\_A ..... TCTT. .... T.GC..  
 [138]  
 LAT4B\_Y34\_B ..... A. .... TCTT. .... AGC..  
 [141]  
 NOT1A\_PR12\_A ..... ----. .... T.G..  
 [135]  
 NOT3A\_PR15\_A ..... A. .... TCTT. .... T.GC..  
 [138]  
 NOT3B\_PR15\_B ..... ----. .... T.G..  
 [135]  
 NOT4A\_PR114\_A ..... A. .... TCTT. .... T.GC..  
 [138]  
 NOT4B\_PR114\_B ..... TCTT. .... AGC..  
 [135]  
 HIM1A\_N620\_A ..... TCTT. .... T. .... TGG..  
 [138]  
 HIM2A\_C2842\_1 ..... TCTT. .... T. .... TGG..  
 [138]  
 HIM3A\_PR18\_A ..... TCTT. .... T. .... TGG..  
 [139]  
 HIM3B\_PR18\_B ..... TCTT. .... T. .... TGG..  
 [138]  
 HIM4A\_PR19\_A ..... TCTT. .... T. .... TGG..  
 [138]  
 HIM5A\_PR45\_A ..... G. .... TCTT. .... T..C..  
 [137]  
 HIM5B\_PR45\_B ..... G. .... TCTT. .... G. .... T..C..  
 [137]  
 HIM6A\_JM521\_A ..... G. .... TCTT. .... R. .... T..C..  
 [137]  
 HTELESIPHE\_N11 ..... TCTT. .... A. .... T. .... TAGC..  
 [139]  
 HCLYSONIMUS\_C3037 ..... TCTT. .... A. .... GC..  
 [138]

[ 160 170 180 190  
 [ 200 ]  
 [ . . . . ]

CHE2A\_C140\_A TAATCTGATA GGACTAATAC TATGAATAAT AT-----G  
 [167]  
 CHE2B\_C140\_B .....  
 [167]  
 CHE4A\_C201\_A .....  
 [167]  
 CYR1A\_N588\_A ..... A. .... .G-----  
 [170]  
 CYR1B\_N588\_B ..... A. .... .G-----  
 [170]  
 CYR2A\_C2861#1 .....  
 [167]  
 CYR2B\_C2861#2 ..... A. .... .G-----  
 [171]  
 CYR3A\_PR03\_A ..... A. .... .G-----  
 [171]  
 CYR3B\_PR03\_B ..... A. .... .G-----  
 [171]  
 CYR5A\_PR31\_A ..... A..A. .... .G-----  
 [170]  
 CYR5B\_PR31\_B .....  
 [167]  
 CYR6A\_PR43\_A .....  
 [167]  
 CYR6B\_PR43\_B ..... A. .... .G-----  
 [171]  
 PET1A\_N7153\_A ..... A. ....  
 [166]

|                |                 |         |
|----------------|-----------------|---------|
| PET1B_N7153_B  | ..... A.....    | .G----- |
| [170]          |                 |         |
| PET3A_N7183_A  | ..... A.....    | .G----- |
| [169]          |                 |         |
| PET3B_N7183_B  | ..... A.....    | -----   |
| [166]          |                 |         |
| PET4A_C2980_A  | ..... A.....    | .G----- |
| [170]          |                 |         |
| PET4B_C2980_B  | .G..... A.....  | -----   |
| [156]          |                 |         |
| PET7A_PR26_A   | ..... A.....    | .G----- |
| [170]          |                 |         |
| PET7B_PR26_B   | ..... A..G..... | .G----- |
| [171]          |                 |         |
| HYCO2A_C455_A  | ..... A.....    | .G----- |
| [170]          |                 |         |
| HYCO2B_C455_B  | ..... A.....    | -----   |
| [169]          |                 |         |
| HYCO3A_C456_A  | ..... A.....    | .G----- |
| [160]          |                 |         |
| HYCO3B_C456_B  | ..... A.....    | .G----- |
| [160]          |                 |         |
| HYCO4A_C457_A  | ..... A..G..... | .G----- |
| [169]          |                 |         |
| HYCO4B_C457_B  | ..... A..G..... | .G----- |
| [172]          |                 |         |
| HYTT1A_TT05_A  | ..... A.....    | .G----- |
| [170]          |                 |         |
| HYTT1B_TT05_B  | ..... A.....    | .G----- |
| [170]          |                 |         |
| HYTT4A_TT12_A  | ..... A.....    | -----   |
| [168]          |                 |         |
| HYTT4B_TT12_B  | ..... A.....    | .G----- |
| [171]          |                 |         |
| HYFG1A_C420_A  | ..... A.....    | -----   |
| [168]          |                 |         |
| HYFG2A_C440_A  | ..... A.....    | G.----- |
| [166]          |                 |         |
| HYFG3A_C442_A  | ..... A.....    | .G----- |
| [171]          |                 |         |
| HYFG4A_C444_A  | ..... A.....    | .G----- |
| [170]          |                 |         |
| ERA1A_C347_A   | ..... A.....    | -----   |
| [167]          |                 |         |
| ERA2A_C348_A   | ..... A.....    | .G----- |
| [168]          |                 |         |
| EMM1A_JM443_A  | ..... A.....    | .G----- |
| [171]          |                 |         |
| EMM1B_JM443_B  | ..... A.....    | .G----- |
| [171]          |                 |         |
| EMM2A_JM1105_A | ..... A.....    | -----   |
| [166]          |                 |         |
| EMM2B_JM1105_B | ..... A.....    | .G----- |
| [171]          |                 |         |
| ETY1A_N27_A    | ..... A.....    | -----   |
| [168]          |                 |         |
| ETY1B_N27_B    | ..... A.....    | -----   |
| [168]          |                 |         |
| ETY2A_N101_A   | ..... A.....    | .G----- |
| [169]          |                 |         |
| ETY2B_N101_B   | ..... A.....    | .G----- |
| [171]          |                 |         |
| ETY3A_PR05_A   | ..... A.....    | .G----- |
| [170]          |                 |         |
| ETY3B_PR05_B   | ..... A.....    | .G----- |
| [164]          |                 |         |
| ETY4A_PR06_A   | ..... A.....    | G.----- |
| [167]          |                 |         |
| ETY4B_PR06_B   | ..... A.....    | G.----- |
| [167]          |                 |         |
| FAV1A_JM488_A  | ..... A.....    | .G----- |
| [163]          |                 |         |



```

FAV2A_JM883_A      ..... A..... ..-----
  [169]
FAV4A_JM1908_A    ..... A..... ..-----
  [169]
LAT1A_N2239_A     ..... A..... ..-----
  [167]
LAT2A_Y30_A       ..... A..... ..-----
  [168]
LAT2B_Y30_B       ..... A..... .C..... ..-----
  [168]
LAT3A_Y31_A       ..... A..... ..-----
  [167]
LAT3B_Y31_B       ..... A..... .G-----
  [170]
LAT4A_Y34_A       ..... A..... .G-----
  [171]
LAT4B_Y34_B       ..... A..... .G-----
  [174]
NOT1A_PR12_A      ..... A..... ..-----
  [168]
NOT3A_PR15_A      ..... A..... .G-----
  [170]
NOT3B_PR15_B      ..... A..... ..-----A
  [168]
NOT4A_PR114_A     ..... A..... .G-----
  [171]
NOT4B_PR114_B     ..... A..... .ATATAATAT GAATAATAG.
  [185]
HIM1A_N620_A      ..... A..... .G-----
  [171]
HIM2A_C2842_1     ..... A..... .G-----
  [171]
HIM3A_PR18_A      ..... A..... .G-----
  [172]
HIM3B_PR18_B      ..... A..... .G-----
  [171]
HIM4A_PR19_A      ..... A..... .G-----
  [171]
HIM5A_PR45_A      ..... A..... .G-----
  [170]
HIM5B_PR45_B      ..... A..... .G-----
  [170]
HIM6A_JM521_A     ..... A..... .G-----
  [170]
HTELESIPHE_N11   ..... A..... .W..G-----
  [172]
HCLYSONIMUS_C3037 ..... A..... .G-----
  [171]

```

```

[           210           220           230           240
  250]
[           .           .           .           .           .]

```

```

CHE2A_C140_A      AGTATTATGA ATGAGATTAA ACACTCAT-- ----AGAAT TAACTTTAAA
  [210]
CHE2B_C140_B      .....
  [210]
CHE4A_C201_A      .....
  [210]
CYR1A_N588_A      .T.....A. ....T...A...
  [213]
CYR1B_N588_B      .T.....A. ....T...A...
  [213]
CYR2A_C2861#1     .....C.....
  [210]
CYR2B_C2861#2     RT.....A. ....T...A...
  [214]
CYR3A_PR03_A      .T.....A. ....T...A...
  [214]
CYR3B_PR03_B      .T.....A. ....T...A...
  [214]

```

|                         |                                    |
|-------------------------|------------------------------------|
| CYR5A_PR31_A<br>[213]   | .T.....G.-- ----. .T..A...         |
| CYR5B_PR31_B<br>[210]   | .....                              |
| CYR6A_PR43_A<br>[210]   | .....                              |
| CYR6B_PR43_B<br>[214]   | .T.....A.....T..A...               |
| PET1A_N7153_A<br>[209]  | .C.....G.....                      |
| PET1B_N7153_B<br>[213]  | .T.....G.-- ----. .T..A...         |
| PET3A_N7183_A<br>[212]  | .T.....G.-- ----. .T..C...         |
| PET3B_N7183_B<br>[205]  | .C.....                            |
| PET4A_C2980_A<br>[220]  | .T.....TG.CT AGAAT.....T..A...     |
| PET4B_C2980_B<br>[199]  | .C.....G.....                      |
| PET7A_PR26_A<br>[213]   | .T.....C.C.....G.-- ----. .T..A... |
| PET7B_PR26_B<br>[214]   | .T.....G.-- ----. .T..C...         |
| HYCO2A_C455_A<br>[213]  | .T.....G.-- ----. .T..C...         |
| HYCO2B_C455_B<br>[212]  | .C.....A.....                      |
| HYCO3A_C456_A<br>[203]  | .T.....T..C...                     |
| HYCO3B_C456_B<br>[203]  | .T.....T..C...                     |
| HYCO4A_C457_A<br>[219]  | .T.....G..TG.CT AGAAT.....T..A...  |
| HYCO4B_C457_B<br>[215]  | .T.....G.-- ----. .T..A...         |
| HYTT1A_TT05_A<br>[213]  | .T.....G.-- ----. .T..C...         |
| HYTT1B_TT05_B<br>[213]  | .T.....G.-- ----. .T..C...         |
| HYTT4A_TT12_A<br>[207]  | .C.....T.....                      |
| HYTT4B_TT12_B<br>[214]  | .T.....G.-- ----. .GT..C...        |
| HYFG1A_C420_A<br>[211]  | .C.....G.....                      |
| HYFG2A_C440_A<br>[205]  | .C.....                            |
| HYFG3A_C442_A<br>[214]  | .T.....G.-- ----. .T..A...         |
| HYFG4A_C444_A<br>[213]  | .T.....G.-- ----. .T..C...         |
| ERA1A_C347_A<br>[206]   | .C.....                            |
| ERA2A_C348_A<br>[211]   | .T.....G.-- ----. .GT..C...        |
| EMM1A_JM443_A<br>[214]  | .T.....A.T..C...                   |
| EMM1B_JM443_B<br>[214]  | .T.....A.....A.T..C...             |
| EMM2A_JM1105_A<br>[209] | .C.....G.....                      |
| EMM2B_JM1105_B<br>[204] | GT.....G..G.-- ----. .             |
| ETY1A_N27_A<br>[211]    | .C.....A.....G...                  |
| ETY1B_N27_B<br>[211]    | .C.....A.....G...                  |
| ETY2A_N101_A<br>[212]   | .T.....TG.-- ----. .T..C...        |
| ETY2B_N101_B<br>[214]   | .T.....G.-- ----. .T..A...         |

ETY3A\_PR05\_A [213] .T.....G.-- .....T...C...  
 ETY3B\_PR05\_B [207] .T.....G.-- .....GT...C...  
 ETY4A\_PR06\_A [206] .C.....C.....  
 ETY4B\_PR06\_B [206] .C.....  
 FAV1A\_JM488\_A [206] .T.....G.-- .....GC...C...  
 FAV2A\_JM883\_A [212] .C.....A.....  
 FAV4A\_JM1908\_A [212] .C.....A.....  
 LAT1A\_N2239\_A [210] .C.....A.....  
 LAT2A\_Y30\_A [207] .C.....T.....  
 LAT2B\_Y30\_B [211] .C.....A.....  
 LAT3A\_Y31\_A [210] .....T.....  
 LAT3B\_Y31\_B [213] .T.....G.-- .....T...C...  
 LAT4A\_Y34\_A [214] .T.....T...A...  
 LAT4B\_Y34\_B [214] .T.....T...C...  
 NOT1A\_PR12\_A [211] .C.....A.C.....  
 NOT3A\_PR15\_A [213] .T.....G.-- .....T...A...  
 NOT3B\_PR15\_B [211] .C.....A.....  
 NOT4A\_PR114\_A [214] .T.....G.-- .....T...A...  
 NOT4B\_PR114\_B [228] .T.....G.-- .....T...C...  
 HIM1A\_N620\_A [214] .T.....G.-- .....T...C...  
 HIM2A\_C2842\_1 [214] .T.....G.-- .....T...C...  
 HIM3A\_PR18\_A [215] .T.....G.-- .....T...C...  
 HIM3B\_PR18\_B [214] .T.....G.-- .....T...C...  
 HIM4A\_PR19\_A [214] .T.....G.-- .....T...C...  
 HIM5A\_PR45\_A [213] .T.....G.-- .....A.T...A...  
 HIM5B\_PR45\_B [213] .T.....G.-- .....A.T...A...  
 HIM6A\_JM521\_A [213] .T.....G.-- .....A.T...A...  
 HTELESIPHE\_N11 [215] .C.....T.....C...  
 HCLYSONIMUS\_C3037 [214] .C.....

[ 300] 260 270 280 290  
 [ . . . . . ]

CHE2A\_C140\_A [260] CTCTACCAGC AACCAACAAA TCTTTTAACT AATTAAATGT AAATTCATAT  
 CHE2B\_C140\_B [260] .....  
 CHE4A\_C201\_A [260] .....  
 CYR1A\_N588\_A [263] .....C...G. ...G.....A.G.

CYR1B\_N588\_B .....C..G. ...G.....A..G.  
 [263]  
 CYR2A\_C2861#1 .....  
 [260]  
 CYR2B\_C2861#2 .....C..G. ...G.....A..G.  
 [264]  
 CYR3A\_PR03\_A .....C..G. ...G.....A..G.  
 [264]  
 CYR3B\_PR03\_B .....G.....C..G. ...G.....A..G.  
 [264]  
 CYR5A\_PR31\_A .....C..G. ...G.....A..G.  
 [263]  
 CYR5B\_PR31\_B .....  
 [260]  
 CYR6A\_PR43\_A .....  
 [260]  
 CYR6B\_PR43\_B .....C..G. ...G.....A..G.  
 [264]  
 PET1A\_N7153\_A .....T.....A.----.C..T.....  
 [255]  
 PET1B\_N7153\_B .....---.G. ...G.....A..G.  
 [260]  
 PET3A\_N7183\_A ...C.....C..GC ...G.....A..G.  
 [262]  
 PET3B\_N7183\_B -----  
 [226]  
 PET4A\_C2980\_A .....C..G. ...G.....A..G.  
 [270]  
 PET4B\_C2980\_B .....  
 [245]  
 PET7A\_PR26\_A .....C..G. ...G.....A..G.  
 [263]  
 PET7B\_PR26\_B ...C.....C..GC ...G.....A..G.  
 [264]  
 HYCO2A\_C455\_A ...C.....C..G. ...G.....A..G.  
 [263]  
 HYCO2B\_C455\_B ..--.....T.....  
 [260]  
 HYCO3A\_C456\_A ...C.....T.....C..GC ...G.....A..G.  
 [253]  
 HYCO3B\_C456\_B ...C.....T.....C..GC ...G.....A..G.  
 [253]  
 HYCO4A\_C457\_A .....C..G. ...G.....A..G.  
 [269]  
 HYCO4B\_C457\_B .....C..G. ...G.....A..G.  
 [265]  
 HYTT1A\_TT05\_A ...C.....C..G. ...G.....A..G.  
 [263]  
 HYTT1B\_TT05\_B ...C.....C..GC ...G.....A..G.  
 [263]  
 HYTT4A\_TT12\_A -----  
 [228]  
 HYTT4B\_TT12\_B ...C.....G.....C..GC ...G.....A..G.  
 [264]  
 HYFG1A\_C420\_A .....T...G.....G.----.T.....  
 [257]  
 HYFG2A\_C440\_A -----  
 [226]  
 HYFG3A\_C442\_A .....---.G. ...G.....A..G.  
 [261]  
 HYFG4A\_C444\_A ...C.....C..GC ...G.....A..G.  
 [263]  
 ERA1A\_C347\_A -----  
 [227]  
 ERA2A\_C348\_A .....C..G. ...G.....G.  
 [261]  
 EMM1A\_JM443\_A ...C.....T.....C..GC ...G.....A..G.  
 [264]  
 EMM1B\_JM443\_B ...C.....T.....C..GC ...G.....A..G.  
 [264]  
 EMM2A\_JM1105\_A .....  
 [255]

```

EMM2B_JM1105_B      .....C..G. ...G..C... ..A..G.
[254]
ETY1A_N27_A         .....T.....T.....
[261]
ETY1B_N27_B         .....T.....T.....
[261]
ETY2A_N101_A        ...C.....C..GC ...G.....A..G.
[262]
ETY2B_N101_B        .....---.G. ...G.....A..G.
[261]
ETY3A_PR05_A        ...C.....C..GC ...G.....A..G.
[263]
ETY3B_PR05_B        .....C..G. ...G.....T..G.
[257]
ETY4A_PR06_A        -----
[227]
ETY4B_PR06_B        -----
[227]
FAV1A_JM488_A       .....C..G. ...G.....T..G.
[256]
FAV2A_JM883_A       ..--.....T.....G.....G.
[260]
FAV4A_JM1908_A      ..--.....T.....G.....G.
[260]
LAT1A_N2239_A       ..--.....T.....
[258]
LAT2A_Y30_A         -----
[228]
LAT2B_Y30_B         ..--.....T.....
[259]
LAT3A_Y31_A         .....
[260]
LAT3B_Y31_B         .....G.C..G. ...G.....A..G.
[263]
LAT4A_Y34_A         .....---.G. ...G.....A..G.
[261]
LAT4B_Y34_B         ...C.....C..GC ...G.....A..G.
[264]
NOT1A_PR12_A        ..--.....T.....
[259]
NOT3A_PR15_A        .....---.G. ...G.....A..G.
[260]
NOT3B_PR15_B        .....T.....
[261]
NOT4A_PR114_A       .....---.G. ...G.....A..G.
[261]
NOT4B_PR114_B       ...C.....-T.....C..GC ...G.....A..G.
[277]
HIM1A_N620_A        .....T.....C..G. ...G.....G.
[264]
HIM2A_C2842_1       .....T.....C..G. ...G.....G.
[264]
HIM3A_PR18_A        .....T.....C..G. ...G.....G.
[265]
HIM3B_PR18_B        .....T.....C..G. ...G.....G.
[264]
HIM4A_PR19_A        .....T.....C..G. ...G.....G.
[264]
HIM5A_PR45_A        .....C..G. ...G.....A..G.
[263]
HIM5B_PR45_B        .....C..G. ...G.....A..G.
[263]
HIM6A_JM521_A       .....C..G. ...G.....A..G.
[263]
HTELESIPHE_N11     .....T... TTGTTGTTG CTAG...TTA .....A..G.
[265]
HCLYSONIMUS_C3037  .....T.....T.....A..G.
[264]

```

```

[           310           320           330           340
[ 350]
[ . . . . . ]

```

|                        |                                                        |
|------------------------|--------------------------------------------------------|
| CHE2A_C140_A<br>[310]  | TTTAAATAAT TTTCATGATA TGAGATGCTC TATTAAACAA ATGTAATAAA |
| CHE2B_C140_B<br>[310]  | .....                                                  |
| CHE4A_C201_A<br>[310]  | .....                                                  |
| CYR1A_N588_A<br>[312]  | .C.....T.A.....C..T.....                               |
| CYR1B_N588_B<br>[312]  | .C.....T.A.....C..T.....                               |
| CYR2A_C2861#1<br>[310] | .....                                                  |
| CYR2B_C2861#2<br>[313] | .C.....T.A.....C..T.....                               |
| CYR3A_PR03_A<br>[313]  | .C.....T.A.....C..T.....                               |
| CYR3B_PR03_B<br>[313]  | .C.....T.A.....C..T.....                               |
| CYR5A_PR31_A<br>[313]  | .....T.A.....C..T.....                                 |
| CYR5B_PR31_B<br>[310]  | .....                                                  |
| CYR6A_PR43_A<br>[310]  | .....                                                  |
| CYR6B_PR43_B<br>[313]  | .C.....T.A.....C..T.....                               |
| PET1A_N7153_A<br>[305] | .....A...G.....C.....                                  |
| PET1B_N7153_B<br>[309] | .....T.A.....C..T.....                                 |
| PET3A_N7183_A<br>[312] | .....T.A.....C..T.....                                 |
| PET3B_N7183_B<br>[276] | .....T..A.....A.....                                   |
| PET4A_C2980_A<br>[320] | .....T.A...G.....C.....                                |
| PET4B_C2980_B<br>[295] | .....G.A...G.....C.....                                |
| PET7A_PR26_A<br>[313]  | .....T.A.....C..T.....                                 |
| PET7B_PR26_B<br>[314]  | .....C.....T.A.....C..T.....                           |
| HYCO2A_C455_A<br>[313] | .....T.A.....C..T.....                                 |
| HYCO2B_C455_B<br>[310] | .....A.....A.....CG.....                               |
| HYCO3A_C456_A<br>[303] | .....T.A.....C..T.....                                 |
| HYCO3B_C456_B<br>[303] | .....T.A.....C..T.....                                 |
| HYCO4A_C457_A<br>[319] | .....TT.A.....TC..T.....                               |
| HYCO4B_C457_B<br>[314] | .C.....T.A.....C..T.....                               |
| HYTT1A_TT05_A<br>[313] | .....T.A.....C..T.....                                 |
| HYTT1B_TT05_B<br>[313] | .....C.....T.A.....C..T.....                           |
| HYTT4A_TT12_A<br>[278] | .....A.....C.....                                      |
| HYTT4B_TT12_B<br>[314] | .....T.A.....T.....G                                   |
| HYFG1A_C420_A<br>[307] | .....T.A...G.....C.....                                |
| HYFG2A_C440_A<br>[276] | .....A.....                                            |
| HYFG3A_C442_A<br>[310] | .....T.A.....C..T.....                                 |
| HYFG4A_C444_A<br>[313] | .....C.....T.A.....C..T.....                           |

|                |                                  |
|----------------|----------------------------------|
| ERA1A_C347_A   | .....A.....                      |
| [277]          |                                  |
| ERA2A_C348_A   | .....A.....T.....G               |
| [311]          |                                  |
| EMM1A_JM443_A  | .....T.A.....C.....T.....        |
| [314]          |                                  |
| EMM1B_JM443_B  | .....T.A.....C.....T.....        |
| [314]          |                                  |
| EMM2A_JM1105_A | .....A..G.....C.....             |
| [305]          |                                  |
| EMM2B_JM1105_B | .....T.A.....C.....T.....        |
| [304]          |                                  |
| ETY1A_N27_A    | .....C A.....A.....C.....        |
| [311]          |                                  |
| ETY1B_N27_B    | .....C A.....A.....C.....        |
| [311]          |                                  |
| ETY2A_N101_A   | .....-.....T.A.....TC.....T..... |
| [311]          |                                  |
| ETY2B_N101_B   | .....-.....T.A.....C.....T.....  |
| [310]          |                                  |
| ETY3A_PR05_A   | .....G.....T.A.....C.....T.....  |
| [313]          |                                  |
| ETY3B_PR05_B   | .....T-----G.-TG.-----           |
| [287]          |                                  |
| ETY4A_PR06_A   | .....A..A.....                   |
| [277]          |                                  |
| ETY4B_PR06_B   | .....A..A.....                   |
| [277]          |                                  |
| FAV1A_JM488_A  | .....A.....T.....G               |
| [306]          |                                  |
| FAV2A_JM883_A  | .....A.....C..A.....T.....       |
| [310]          |                                  |
| FAV4A_JM1908_A | .....A.....C..A.....T.....       |
| [310]          |                                  |
| LAT1A_N2239_A  | .....A.....A.....CG.....         |
| [308]          |                                  |
| LAT2A_Y30_A    | ..A.....A.....C.....             |
| [278]          |                                  |
| LAT2B_Y30_B    | .....A.....C..A.....C.....       |
| [309]          |                                  |
| LAT3A_Y31_A    | ..C.....A C.....                 |
| [310]          |                                  |
| LAT3B_Y31_B    | .....T..T.A.....C.....T.....     |
| [313]          |                                  |
| LAT4A_Y34_A    | .....-.....T.A.....C.....T.....  |
| [310]          |                                  |
| LAT4B_Y34_B    | .....C.....T.A.....C.....T.....  |
| [314]          |                                  |
| NOT1A_PR12_A   | .....A.....A.....C.....          |
| [309]          |                                  |
| NOT3A_PR15_A   | .....-.....T.A.....C.....T.....  |
| [309]          |                                  |
| NOT3B_PR15_B   | .....A.....A.....C.....          |
| [311]          |                                  |
| NOT4A_PR114_A  | .....-.....T.A.....C.....T.....  |
| [310]          |                                  |
| NOT4B_PR114_B  | .....T.A.....C.....T.....        |
| [327]          |                                  |
| HIM1A_N620_A   | .....C.....T..A.....T.....       |
| [314]          |                                  |
| HIM2A_C2842_1  | .....C.....T..A.....T.....       |
| [314]          |                                  |
| HIM3A_PR18_A   | .....C.....T..A.....T.....       |
| [315]          |                                  |
| HIM3B_PR18_B   | .....C.....T..A.....T.....       |
| [314]          |                                  |
| HIM4A_PR19_A   | .....C.....T..A.....T.....       |
| [314]          |                                  |
| HIM5A_PR45_A   | ..G.....T.A.....T.C.....T.....   |
| [313]          |                                  |
| HIM5B_PR45_B   | ..G.....T.A.....T.C.....T.....   |
| [313]          |                                  |

```

HIM6A_JM521_A      ...G.....T.A.....T.C...T.....
  [313]
HTELESIPHE_N11    .....C.....CT..T.A.....TT...T.....
  [315]
HCLYSONIMUS_C3037 .....C.....TGCT..T.A.....T...T.....
  [314]

```

```

[           360           370           380           390
[   400]
[           .           .           .           .           .]

```

```

CHE2A_C140_A      AACTTTAAGT CAAAAATTAG ACTGAAACAA TTAA-----
  [345]
CHE2B_C140_B      .....
  [345]
CHE4A_C201_A      .....
  [345]
CYR1A_N588_A      C.....T.AA .....A .....A.G ....G-----
  [347]
CYR1B_N588_B      C.....T.AA .....A .....A.G ....G-----
  [347]
CYR2A_C2861#1     .....
  [345]
CYR2B_C2861#2     .....T.AA .....A.G ....G-----
  [348]
CYR3A_PR03_A      .....T.AA .....A.G ....G-----
  [348]
CYR3B_PR03_B      .....T.AA .....A.G ....G-----
  [348]
CYR5A_PR31_A      .....T.AA .....A.G ....G-----
  [348]
CYR5B_PR31_B      .....
  [345]
CYR6A_PR43_A      .....
  [345]
CYR6B_PR43_B      .....T.AA .....A.G ....G-----
  [348]
PET1A_N7153_A     .....T.....A.T.G.C .-----
  [336]
PET1B_N7153_B     .....T.A- .....A.G ....G-----
  [342]
PET3A_N7183_A     .....T.AA .....A.G ....G-----
  [347]
PET3B_N7183_B     .....A. ....A.. ....G-----AAAA
  [315]
PET4A_C2980_A     .....T.....A.T.G.C .-----
  [351]
PET4B_C2980_B     .....T.....A.T.G.C .-----
  [326]
PET7A_PR26_A      .....T.AA .....A.G ....G-----
  [348]
PET7B_PR26_B      .....T.AA .....A.G ....G-----
  [349]
HYCO2A_C455_A     .....T.AA .....A.G ..C.G-----
  [348]
HYCO2B_C455_B     .G.....AC .....A.. ....G-----
  [345]
HYCO3A_C456_A     .....T.AA .....T .....A.G ....G-----
  [337]
HYCO3B_C456_B     .....T.AA .....T .....A.G ....G-----
  [337]
HYCO4A_C457_A     .....T.AA .....A.G ....G-----
  [354]
HYCO4B_C457_B     .....T.AA .....A.G ....G-----
  [349]
HYTT1A_TT05_A     .....T.AA .....A.G ....G-----
  [348]
HYTT1B_TT05_B     .....T.AA .....A.G ....G-----
  [348]
HYTT4A_TT12_A     .....A. ....A.. ....G-----
  [313]

```



|                         |                                        |
|-------------------------|----------------------------------------|
| HYTT4B_TT12_B<br>[345]  | .....C.A. ....-- --.T...A.G G...G----- |
| HYFG1A_C420_A<br>[342]  | .....T.....A..A...G-----               |
| HYFG2A_C440_A<br>[311]  | .....A.....A...G-----                  |
| HYFG3A_C442_A<br>[344]  | .....T.AA -.....T.....A.G....G-----    |
| HYFG4A_C444_A<br>[348]  | .....T.AA.....A.G....G-----            |
| ERA1A_C347_A<br>[327]   | .....A.....T..A...GAAATA ATTTTGAAAG    |
| ERA2A_C348_A<br>[342]   | .....C.A. ....-- --.T...A.G....G-----  |
| EMM1A_JM443_A<br>[349]  | .....T.AA.....A...TG-----              |
| EMM1B_JM443_B<br>[349]  | .....T.AA.....A...TG-----              |
| EMM2A_JM1105_A<br>[336] | .....T.....A.T.G.C .-----              |
| EMM2B_JM1105_B<br>[338] | .....T.AA.....T.....AGT...G-----       |
| ETY1A_N27_A<br>[345]    | -......A.....T.....A.G..A.G-----       |
| ETY1B_N27_B<br>[345]    | -......A.....T.....A.G..A.G-----       |
| ETY2A_N101_A<br>[346]   | .....T.AA.....A.G....G-----            |
| ETY2B_N101_B<br>[344]   | .....T.AA -.....A.G....G-----          |
| ETY3A_PR05_A<br>[348]   | .....T.AA.....A.G....G-----            |
| ETY3B_PR05_B<br>[315]   | ---...C.A. ....-- --.T...A.G....G----- |
| ETY4A_PR06_A<br>[312]   | .....A.....A...G-----                  |
| ETY4B_PR06_B<br>[312]   | .....A.....A...G-----                  |
| FAV1A_JM488_A<br>[337]  | .....C.A. ....-- --.T...A.G....G-----  |
| FAV2A_JM883_A<br>[345]  | .....A.T.....A...G-----                |
| FAV4A_JM1908_A<br>[345] | .....A.T.....A...G-----                |
| LAT1A_N2239_A<br>[343]  | .....AC.....A...G-----                 |
| LAT2A_Y30_A<br>[313]    | .....A.....A...G-----                  |
| LAT2B_Y30_B<br>[344]    | .....A.....A...G-----                  |
| LAT3A_Y31_A<br>[345]    | .....A.....A...-----                   |
| LAT3B_Y31_B<br>[348]    | .....T.AA T.....A.G....G-----          |
| LAT4A_Y34_A<br>[344]    | .....T.AA -.....A.G....G-----          |
| LAT4B_Y34_B<br>[349]    | .....T.AA.....A.G....G-----            |
| NOT1A_PR12_A<br>[344]   | .....A.....T..T.....A...G-----         |
| NOT3A_PR15_A<br>[343]   | .....T.AA -.....A.G....G-----          |
| NOT3B_PR15_B<br>[346]   | .....A.....A...G-----                  |
| NOT4A_PR114_A<br>[344]  | .....T.AA -.....A.G....G-----          |
| NOT4B_PR114_B<br>[362]  | .....T.AA.....A.G....G-----            |
| HIM1A_N620_A<br>[345]   | .....C.A. ....-- --.T...A.G....G-----  |
| HIM2A_C2842_1<br>[345]  | .....C.A. ....-- --.T...A.G....G-----  |

```

HIM3A_PR18_A      .....C.A. ....-- --.T...A.G ....G-----
[346]
HIM3B_PR18_B      .....C.A. ....-- --.T...A.G ....G-----
[345]
HIM4A_PR19_A      .....C.A. ....T- --.-...A.G ....G-----
[345]
HIM5A_PR45_A      .....T.AA .....A.G ....G-----
[348]
HIM5B_PR45_B      .....T.AA .....A.G ....G-----
[348]
HIM6A_JM521_A     .....T.AA .....A.G ....G-----
[348]
HTELESIPHE_N11    .....C.AA .....A.G ....G-----
[350]
HCLYSONIMUS_C3037.....C.AA .....T. ....A.G ....G-----
[349]

```

```

[           410           420           430           440
[           .           .           .           .           . ]

```

```

CHE2A_C140_A      ---AGATAA TT-----TGT GTATGGTAGG AGTATATGGG AGAGATATAA
[386]
CHE2B_C140_B      -----
[386]
CHE4A_C201_A      -----
[386]
CYR1A_N588_A      ---G.....-----...C.....T G..... G.T.G.....
[389]
CYR1B_N588_B      ---G.....-----...C.....T G..... G.T.G.....
[389]
CYR2A_C2861#1     -----
[386]
CYR2B_C2861#2     ---G.....-----...AT .....A. G.T.G.....
[390]
CYR3A_PR03_A      ---G.....-----...G.....AT .....A. G.T.G.....
[390]
CYR3B_PR03_B      ---G.....-----...AT .....A. G.T.G.....
[390]
CYR5A_PR31_A      ---G.....-----...T ..... G.T.G.....
[390]
CYR5B_PR31_B      -----
[386]
CYR6A_PR43_A      -----
[386]
CYR6B_PR43_B      ---G.....-----...AT .....A. G.T.G.....
[390]
PET1A_N7153_A     -----C. ....T.....
[377]
PET1B_N7153_B     ---G.....-----...TCT ..... G.T.G.....
[384]
PET3A_N7183_A     ---G.....-----...T ..... G.T.G.....
[389]
PET3B_N7183_B     AAAG.A.... ..AGAAT... ..T.....
[365]
PET4A_C2980_A     -----T.....
[392]
PET4B_C2980_B     -----T.....
[367]
PET7A_PR26_A      ---G.....-----...AT .....A. G.T.G.....
[390]
PET7B_PR26_B      ---G.....-----...AT .....A. G.T.G.....
[391]
HYCO2A_C455_A     ---G.....-----...AT .....A. G.T.GA....
[390]
HYCO2B_C455_B     -----A-----...A ..... G.....
[386]
HYCO3A_C456_A     ---G.....-----...AT .....A. G.TAG.....
[379]
HYCO3B_C456_B     ---G.....-----...AT .....A. G.TAG.....
[379]

```

|                         |                                    |
|-------------------------|------------------------------------|
| HYCO4A_C457_A<br>[396]  | ---G.....AT.....A.G.T.G.....       |
| HYCO4B_C457_B<br>[391]  | ---G.....AT.....G.T.G.....         |
| HYTT1A_TT05_A<br>[390]  | ---G.....T.....G.T.G.....          |
| HYTT1B_TT05_B<br>[390]  | ---G.....AT.....A.G.T.G.....       |
| HYTT4A_TT12_A<br>[353]  | -----G.T.....                      |
| HYTT4B_TT12_B<br>[386]  | ----.A.C.....A...G.....            |
| HYFG1A_C420_A<br>[383]  | -----T.....                        |
| HYFG2A_C440_A<br>[352]  | ----.A.....T.....A.....            |
| HYFG3A_C442_A<br>[386]  | ---G.....CT.....G.T.G.....         |
| HYFG4A_C444_A<br>[390]  | ---G.....A-----AT.....A.G.T.G..... |
| ERA1A_C347_A<br>[377]   | AAAG.A....AGAAT....T.....          |
| ERA2A_C348_A<br>[383]   | ----.A.C.....G.....                |
| EMM1A_JM443_A<br>[390]  | -----A-----A.....G...G             |
| EMM1B_JM443_B<br>[390]  | -----A-----A.....G...G             |
| EMM2A_JM1105_A<br>[377] | -----C.....T.....                  |
| EMM2B_JM1105_B<br>[380] | ---G.....AT.....T.G.....           |
| ETY1A_N27_A<br>[385]    | -----AT.....-A.G.T.G.....          |
| ETY1B_N27_B<br>[385]    | -----AT.....-A.G.T.G.....          |
| ETY2A_N101_A<br>[388]   | ---G.....TT.....A.G.T.G.....       |
| ETY2B_N101_B<br>[386]   | ---G.....CT.....G.T.G.....         |
| ETY3A_PR05_A<br>[390]   | ---G.....AT.....G.T.G.....         |
| ETY3B_PR05_B<br>[356]   | ----.A.C.....G.....                |
| ETY4A_PR06_A<br>[353]   | ----.A.....T.....A.....            |
| ETY4B_PR06_B<br>[353]   | ----.A.....T.....A.....            |
| FAV1A_JM488_A<br>[378]  | ----.A.C.....G.....                |
| FAV2A_JM883_A<br>[386]  | -----A-----G.....                  |
| FAV4A_JM1908_A<br>[386] | -----A-----G.....                  |
| LAT1A_N2239_A<br>[384]  | -----A-----A.....G.....            |
| LAT2A_Y30_A<br>[354]    | -----G.T.....                      |
| LAT2B_Y30_B<br>[385]    | -----A-----G.....                  |
| LAT3A_Y31_A<br>[386]    | -----                              |
| LAT3B_Y31_B<br>[390]    | ---G.....T.....G.T.G.....          |
| LAT4A_Y34_A<br>[386]    | ---G.....CT.....G.T.G.....         |
| LAT4B_Y34_B<br>[391]    | ---G.....AT.....A.G.T.G.....       |
| NOT1A_PR12_A<br>[385]   | -----A-----                        |
| NOT3A_PR15_A<br>[385]   | ---G.....CT.....G.T.G.....         |

NOT3B\_PR15\_B [387] ----. . . . .A----- . . . . .G. . . . .  
 NOT4A\_PR114\_A [386] ---G. . . . .CT . . . . .G.T.G. . . . .  
 NOT4B\_PR114\_B [404] ---G. . . . .AT . . . . .A. G.T.G. . . . .  
 HIM1A\_N620\_A [386] ----.A.C. . . . .G. . . . .  
 HIM2A\_C2842\_1 [386] ----.A.C. . . . .G. . . . .  
 HIM3A\_PR18\_A [387] ----.A.C. . . . .G. . . . .  
 HIM3B\_PR18\_B [386] ----.A.C. . . . .G. . . . .  
 HIM4A\_PR19\_A [386] ----.A.C. . . . .G. . . . .  
 HIM5A\_PR45\_A [390] ---G. . . .C. . . . .T . . . .G. . . .G.T.G. . . . .  
 HIM5B\_PR45\_B [390] ---G. . . .C. . . . .C.T . . . .G. . . .G.T.G. . . . .  
 HIM6A\_JM521\_A [390] ---G. . . .C. . . . .T . . . .G. . . .G.T.G. . . . .  
 HTELESIPHE\_N11 [391] ----. . . .C. . . . .C. . . . .T. . . . .AG.T. . . . .  
 HCLYSONIMUS\_C3037 [390] ----. . . . .A. . . . .A. . . . .C . . . .G. . . . .

[ 460 470 480 490  
 [ 500 . . . . . ]

CHE2A\_C140\_A [410] TAACAAAA-- ---ACAGTTT GCTAAGAAA- ----  
 CHE2B\_C140\_B [410] . . . . .- - - . . . . .- - - - -  
 CHE4A\_C201\_A [410] . . . . .- - - . . . . .- - - - -  
 CYR1A\_N588\_A [417] . . . . .GTC TCT.AT.C. . .C..A.- - - - -  
 CYR1B\_N588\_B [417] . . . . .GTC TCT.AT.C. . .C..A.- - - - -  
 CYR2A\_C2861#1 [410] . . . . .- - - . . . . .- - - - -  
 CYR2B\_C2861#2 [418] . . . . .GTC TCT. . . .C. . .C..A.- - - - -  
 CYR3A\_PR03\_A [418] . . . . .GTC TCT. . . .C. . .C..A.- - - - -  
 CYR3B\_PR03\_B [418] . . . . .GTC TCT. . . .C. . .C..A.- - - - -  
 CYR5A\_PR31\_A [418] . . . . .GTC TCT. . . .C. . .C..A.- - - - -  
 CYR5B\_PR31\_B [410] . . . . .- - - . . . . .- - - - -  
 CYR6A\_PR43\_A [410] . . . . .- - - . . . . .- - - - -  
 CYR6B\_PR43\_B [418] . . . . .GTC TCT. . . .C. . .C..A.- - - - -  
 PET1A\_N7153\_A [400] . . . . .- - - . . . . . . . .A.- - - - -  
 PET1B\_N7153\_B [412] . . . . .GTC TCT. . . .C. . .C..A.- - - - -  
 PET3A\_N7183\_A [417] . . . . .GTC TCT. . . .C. . .C..A.- - - - -  
 PET3B\_N7183\_B [389] . . . . .- - - .T. . . . . . . .A.- - - - -  
 PET4A\_C2980\_A [416] . . . . .- - - . . . . . . . .A.- - - - -  
 PET4B\_C2980\_B [391] . . . . .- - - . . . . . . . .A.- - - - -  
 PET7A\_PR26\_A [418] . . . . .GTC TCT. . . .C. . .C..A.- - - - -

|                         |                                |            |
|-------------------------|--------------------------------|------------|
| PET7B_PR26_B<br>[419]   | .....GTC TCT....C...C.A...--   | -----      |
| HYCO2A_C455_A<br>[418]  | .....GTC TCT....C...C.A...--   | -----      |
| HYCO2B_C455_B<br>[411]  | .....-- .....                  | A...A----- |
| HYCO3A_C456_A<br>[407]  | .....GTC TCT...AC...C.A...--   | -----      |
| HYCO3B_C456_B<br>[407]  | .....GTC TCT...AC...C.A...--   | -----      |
| HYCO4A_C457_A<br>[424]  | .....GTC TCT....C...C.A...--   | -----      |
| HYCO4B_C457_B<br>[419]  | .....GTA TCT....C...C.C.A...-- | -----      |
| HYTT1A_TT05_A<br>[418]  | .....GTC TCT....C...C.A...--   | -----      |
| HYTT1B_TT05_B<br>[418]  | .....GTC TCT....C...C.A...--   | -----      |
| HYTT4A_TT12_A<br>[378]  | .....-- .....                  | A...A----- |
| HYTT4B_TT12_B<br>[413]  | .....TC T---.....              | A...A----- |
| HYFG1A_C420_A<br>[406]  | .....-- .....                  | A...-----  |
| HYFG2A_C440_A<br>[376]  | .....-- .....                  | A...-----  |
| HYFG3A_C442_A<br>[414]  | .....GTC TCT....C...C.A...--   | -----      |
| HYFG4A_C444_A<br>[418]  | .....GTC TCT....C...C.A...--   | -----      |
| ERA1A_C347_A<br>[401]   | .....-- .....                  | A...-----  |
| ERA2A_C348_A<br>[413]   | ....G...TC TCT.....            | A...A----- |
| EMM1A_JM443_A<br>[415]  | .....-- .....                  | A...A----- |
| EMM1B_JM443_B<br>[415]  | .....-- .....                  | A...A----- |
| EMM2A_JM1105_A<br>[402] | .....-- .....                  | A...A----- |
| EMM2B_JM1105_B<br>[408] | .....GTC TCTT...C...C.A...--   | -----      |
| ETY1A_N27_A<br>[414]    | .....GTC TCT....C...AAC.A...-- | -----      |
| ETY1B_N27_B<br>[413]    | .....GTC TCT....C...AAC.A...-- | -----      |
| ETY2A_N101_A<br>[416]   | .....GTC TCT....C...A.C.A...-- | -----      |
| ETY2B_N101_B<br>[414]   | .....GTC TCT....C...C.A...--   | -----      |
| ETY3A_PR05_A<br>[415]   | C.---GTC TCT....C...-.A...--   | -----      |
| ETY3B_PR05_B<br>[386]   | ....G...TC TCT.....            | A...A----- |
| ETY4A_PR06_A<br>[377]   | .....-- .....                  | A...-----  |
| ETY4B_PR06_B<br>[377]   | .....-- .....                  | A...-----  |
| FAV1A_JM488_A<br>[408]  | ....G...TC TCT.....            | A...A----- |
| FAV2A_JM883_A<br>[410]  | .....-- .....                  | A...-----  |
| FAV4A_JM1908_A<br>[411] | .....-- .....                  | A...A----- |
| LAT1A_N2239_A<br>[408]  | .....-- .....                  | A...-----  |
| LAT2A_Y30_A<br>[377]    | .....-- .....                  | A...-----  |
| LAT2B_Y30_B<br>[409]    | .....-- .....                  | A...-----  |
| LAT3A_Y31_A<br>[410]    | .....-- .....                  | -----      |

LAT3B\_Y31\_B .....GTC TCT....C...C..A...-- -----  
 [418]  
 LAT4A\_Y34\_A ...T...GTC TCT....C...C..A...-- -----  
 [414]  
 LAT4B\_Y34\_B .....GTC TCT....C...C..A...-- -----  
 [419]  
 NOT1A\_PR12\_A .....-- .....A...-- -----  
 [409]  
 NOT3A\_PR15\_A .....GTC TCT....C...C..A...-- -----  
 [413]  
 NOT3B\_PR15\_B .....-- .....T.A...-- -----  
 [411]  
 NOT4A\_PR114\_A .....GTC TCT....C...C..A...-- -----  
 [414]  
 NOT4B\_PR114\_B .....GTC TCT....C...C..A...-- -----  
 [432]  
 HIM1A\_N620\_A .....TC C---.....A...A -----  
 [413]  
 HIM2A\_C2842\_1 .....TC C---.....A...A -----  
 [413]  
 HIM3A\_PR18\_A .....TC C---.....A...A -----  
 [414]  
 HIM3B\_PR18\_B .....TC C---.....A...A -----  
 [413]  
 HIM4A\_PR19\_A .....TC C---.....A...A -----  
 [413]  
 HIM5A\_PR45\_A ...G...GTC TCT....C...C..A...-- TCTATACTCT ATCTATAATC  
 [438]  
 HIM5B\_PR45\_B ...G...GTC TCT....C...C..A...-- TCTATACTCT ATGTATAATC  
 [438]  
 HIM6A\_JM521\_A ...G...GTC TCT....C...C..A...-- TCTATACTCT ATCTATAATC  
 [438]  
 HTELESIPHE\_N11 ...G...TC TCT.A.....A...-- -----  
 [420]  
 HCLYSONIMUS\_C3037 .....TT TCT.....A...A...-- -----  
 [419]

[ 510 520 530 540  
 [ 550  
 [ . . . . ]

CHE2A\_C140\_A --TCTTTGAT ATATAGAATA TTAA-GTAAT TTCTTCTCAT TACATAATAG  
 [457]  
 CHE2B\_C140\_B --.....-.....  
 [457]  
 CHE4A\_C201\_A --.....-.....  
 [457]  
 CYR1A\_N588\_A --...A...-...C...C.T..C...G.C.A  
 [453]  
 CYR1B\_N588\_B --...A...-...C...C.T..C...G.C.A  
 [453]  
 CYR2A\_C2861#1 --.....-.....  
 [457]  
 CYR2B\_C2861#2 --...A...-...C...T...G...A  
 [465]  
 CYR3A\_PR03\_A --...A...-...C...T...G...A  
 [465]  
 CYR3B\_PR03\_B --...A...-...C...T...G...A  
 [465]  
 CYR5A\_PR31\_A --C..A...-...C...T..C...G.C.A  
 [464]  
 CYR5B\_PR31\_B --.....-.....  
 [457]  
 CYR6A\_PR43\_A --.....-.....  
 [457]  
 CYR6B\_PR43\_B --...A...-...C...T...G...A  
 [465]  
 PET1A\_N7153\_A --.....G...-...C...TT..C...G...A  
 [447]  
 PET1B\_N7153\_B --...A...-...C...T..T...G...A  
 [459]

PET3A\_N7183\_A [464] --...A.....-...C.....T.....G...A  
 PET3B\_N7183\_B [436] --.....-...C.....T.....G...A  
 PET4A\_C2980\_A [463] --.....-C..C.....T.....G...A  
 PET4B\_C2980\_B [438] --.....-C..C.....T.....G...A  
 PET7A\_PR26\_A [465] --...A.....-...C.....T.TT.....G...A  
 PET7B\_PR26\_B [466] --...A.....-...C.....T.....G...A  
 HYCO2A\_C455\_A [465] --...A.....-...C.....T.....G...A  
 HYCO2B\_C455\_B [457] ---.....-A..C.....T.....G....  
 HYCO3A\_C456\_A [454] --...A.....-...C.....T.....G...A  
 HYCO3B\_C456\_B [454] --...A.....-...C.....T.....G...A  
 HYCO4A\_C457\_A [471] --...A.....-...C.....T.....G...A  
 HYCO4B\_C457\_B [466] --...A.....-.GC.....TT..C...G...A  
 HYTT1A\_TT05\_A [464] --C..A.....-...C.....T..C...G.C.A  
 HYTT1B\_TT05\_B [465] --.T.A.....-...C.....T.....G...A  
 HYTT4A\_TT12\_A [424] ---.....-A..C.....T.....G....  
 HYTT4B\_TT12\_B [459] ---.....-...C.....T.TT.....G...A  
 HYFG1A\_C420\_A [453] --.....-...C.....TT..C...G...A  
 HYFG2A\_C440\_A [423] --.....-...C.....T.....G????  
 HYFG3A\_C442\_A [461] --...A.....-...C.....T..T.....G...A  
 HYFG4A\_C444\_A [465] --...A.....-...C.....T.....G...A  
 ERA1A\_C347\_A [448] --.....-...C.....T.....G...A  
 ERA2A\_C348\_A [459] ---.....-...C.....T.....G...A  
 EMM1A\_JM443\_A [461] ---.....-A..C.....T.....C...A  
 EMM1B\_JM443\_B [461] ---.....-A..C.....T.....C...A  
 EMM2A\_JM1105\_A [448] ---...C.....-A..C.....T.....G....  
 EMM2B\_JM1105\_B [455] --...A.....-...C.....T.....G...A  
 ETY1A\_N27\_A [461] --...A.....-...C.....T.....G...A  
 ETY1B\_N27\_B [460] --...A.....-...C.....T.....G...A  
 ETY2A\_N101\_A [463] --...A.....-...C.....T.....G...A  
 ETY2B\_N101\_B [461] --...A.....-...C.....T..T.....G...A  
 ETY3A\_PR05\_A [462] --...A.....-...C.....T.....G...A  
 ETY3B\_PR05\_B [432] ---.....-...C.....TT..C...G...A  
 ETY4A\_PR06\_A [424] --...C.....-...C.....T.....G...A  
 ETY4B\_PR06\_B [424] --.....-...C.....T.....G...A  
 FAV1A\_JM488\_A [454] ---.....-...C.....TT..C...G...A  
 FAV2A\_JM883\_A [456] ---.....-A..C.....T.....G....

FAV4A\_JM1908\_A [457] ---.....-A..C. ....T. ....G....  
 LAT1A\_N2239\_A [454] ---.....-A..C. ....T. ....G....  
 LAT2A\_Y30\_A [424] --.....-...C. ....T. ....G...A  
 LAT2B\_Y30\_B [456] --.....-A..C. ....T. ....G....  
 LAT3A\_Y31\_A [457] --.....-.....  
 LAT3B\_Y31\_B [465] --...A.....-...C. ....T..T. ....G...A  
 LAT4A\_Y34\_A [461] --...A.....-...C. ....T..T. ....G...A  
 LAT4B\_Y34\_B [466] --...A.....-...C. ....T. ....G...A  
 NOT1A\_PR12\_A [456] --.....-A..C. ....T. ....G....  
 NOT3A\_PR15\_A [460] --...A.....-...C. ....T..T. ....G...A  
 NOT3B\_PR15\_B [458] --.....-A..C. ....T. ....G....  
 NOT4A\_PR114\_A [461] --...A.....-...C. ....T..T. ....G...A  
 NOT4B\_PR114\_B [479] --...A.....-...C. ....T. ....G...A  
 HIM1A\_N620\_A [457] ---.....-...CC ..T.--TT. ....G...A  
 HIM2A\_C2842\_1 [457] ---.....-...CC ..T.--TT. ....G...A  
 HIM3A\_PR18\_A [459] ---.....A...CC .--..T.TT. ....G...A  
 HIM3B\_PR18\_B [457] ---.....-...CC .--..T.TT. ....G...A  
 HIM4A\_PR19\_A [456] ---.....-...CC ..T.---T. ....G...A  
 HIM5A\_PR45\_A [476] TA...A... ..----- ..C. ....C.T. .C...G.C.A  
 HIM5B\_PR45\_B [476] TA...A... ..----- ..C. ....C.T. .C...G.C.A  
 HIM6A\_JM521\_A [476] TA...A... ..----- ..C. ....C.T. .C...G.C.A  
 HTELESIPHE\_N11 [467] --.....-...C. .G.....T. ....G...A  
 HCLYSONIMUS\_C3037 [466] --...G.....-T..C. .G...T..T. ....G...A

[ 560 570 580 590  
 [ 600 ]

CHE2A\_C140\_A [505] CAAT--ATTT TATTACAGAA CCATGCCGAA CAACTTCATA AGAGCTTTCC  
 CHE2B\_C140\_B [505] ...A--.....  
 CHE4A\_C201\_A [505] ....--.....  
 CYR1A\_N588\_A [501] ...A--..A. .G.....A.....  
 CYR1B\_N588\_B [501] ...A--..A. .G.....A.....  
 CYR2A\_C2861#1 [505] ...A--.....  
 CYR2B\_C2861#2 [513] ...A--... C..... T.....A.....  
 CYR3A\_PR03\_A [513] ...A--... C..... T.....A.....  
 CYR3B\_PR03\_B [513] ...A--... C..... T.....A.....  
 CYR5A\_PR31\_A [512] ...C--..A. .G.....A.....



|                         |                                                        |
|-------------------------|--------------------------------------------------------|
| CYR5B_PR31_B<br>[505]   | ...A--.....                                            |
| CYR6A_PR43_A<br>[505]   | ...A--.....                                            |
| CYR6B_PR43_B<br>[513]   | ...A--..... C..... T..... A.....                       |
| PET1A_N7153_A<br>[495]  | ...A--..... A.....                                     |
| PET1B_N7153_B<br>[509]  | A..ATAT... T.....A..C.....G                            |
| PET3A_N7183_A<br>[512]  | ...A--..... A..... C.....                              |
| PET3B_N7183_B<br>[484]  | ...A--..... T..... A..... C.....                       |
| PET4A_C2980_A<br>[511]  | ...A--..... T..... A..... C.....                       |
| PET4B_C2980_B<br>[486]  | ...A--..... A..... C.....                              |
| PET7A_PR26_A<br>[513]   | ...A--..... A..... C.....                              |
| PET7B_PR26_B<br>[514]   | ...A--..... C..... T..... A.....                       |
| HYCO2A_C455_A<br>[513]  | ...A--..A. CG..... A..... C.....                       |
| HYCO2B_C455_B<br>[505]  | ...A--..... G..... A.....                              |
| HYCO3A_C456_A<br>[502]  | ...A--..... C..... T..... A..... C.....                |
| HYCO3B_C456_B<br>[502]  | ...A--..... C..... G..... T..... A..... C.....         |
| HYCO4A_C457_A<br>[519]  | ...A--..... C..... T..... A.....                       |
| HYCO4B_C457_B<br>[514]  | ...A--..... A..... C.....                              |
| HYTT1A_TT05_A<br>[512]  | ...C--..A. G..... A.....                               |
| HYTT1B_TT05_B<br>[513]  | ...A--..... T..... A.....                              |
| HYTT4A_TT12_A<br>[472]  | T..A--..G..... A.....                                  |
| HYTT4B_TT12_B<br>[507]  | ...A--..G..... A.....                                  |
| HYFG1A_C420_A<br>[501]  | ..T.A--..... A.....                                    |
| HYFG2A_C440_A<br>[473]  | ?????????? ?????????? ?????????? ?????????? ?????????? |
| HYFG3A_C442_A<br>[511]  | A..ATA... T..... A.....                                |
| HYFG4A_C444_A<br>[513]  | ...A--..... T..... A.....                              |
| ERA1A_C347_A<br>[496]   | ...A--..... G..... A..... A.....                       |
| ERA2A_C348_A<br>[507]   | ...A--..... A.....                                     |
| EMM1A_JM443_A<br>[509]  | ...A--..... A..... ??                                  |
| EMM1B_JM443_B<br>[509]  | ...A--..... A.....                                     |
| EMM2A_JM1105_A<br>[496] | ...A--..... A..... C.....                              |
| EMM2B_JM1105_B<br>[503] | ...A--G..... T..... A.....                             |
| ETY1A_N27_A<br>[509]    | ...A--.....                                            |
| ETY1B_N27_B<br>[508]    | ...A--.....                                            |
| ETY2A_N101_A<br>[511]   | ...A--..... T..... A.....                              |
| ETY2B_N101_B<br>[511]   | A..ATAT... T..... A.....                               |
| ETY3A_PR05_A<br>[510]   | ...A--..... T..... A.....                              |

ETY3B\_PR05\_B .T.A--.....A.....C.....  
 [480]  
 ETY4A\_PR06\_A ...A--.....G..A.....  
 [472]  
 ETY4B\_PR06\_B ...A--.....A.....  
 [472]  
 FAV1A\_JM488\_A .T.A--.....A.....C.....  
 [502]  
 FAV2A\_JM883\_A ...A--.....T....A.....  
 [504]  
 FAV4A\_JM1908\_A ...A--.....T....A.....  
 [505]  
 LAT1A\_N2239\_A ...A--.....A.....  
 [502]  
 LAT2A\_Y30\_A ...A--.....C.....T....A.....  
 [472]  
 LAT2B\_Y30\_B ...A--.....A.....  
 [504]  
 LAT3A\_Y31\_A ...A--.....A.....  
 [505]  
 LAT3B\_Y31\_B A..ATA.....A.....  
 [515]  
 LAT4A\_Y34\_A A..ATA.....T....A.....  
 [511]  
 LAT4B\_Y34\_B ...A--.....T....A.....  
 [514]  
 NOT1A\_PR12\_A ...A--.....A.....  
 [504]  
 NOT3A\_PR15\_A A..ATA.....T....A.....  
 [510]  
 NOT3B\_PR15\_B .CTA--.....A.....C.....  
 [506]  
 NOT4A\_PR114\_A A..ATA.....T....A.....???  
 [511]  
 NOT4B\_PR114\_B ...A--.....C.....T....A.....  
 [527]  
 HIM1A\_N620\_A ...A--.....A.....C.....  
 [505]  
 HIM2A\_C2842\_1 ...A--.....A.....  
 [505]  
 HIM3A\_PR18\_A ...A--.....A.....C.....  
 [507]  
 HIM3B\_PR18\_B ...A--.....A.....C.....  
 [505]  
 HIM4A\_PR19\_A ...A--.....A.....C.....  
 [504]  
 HIM5A\_PR45\_A ...A--.A..G.....A.....  
 [524]  
 HIM5B\_PR45\_B ...A--.A..G.....A.....  
 [524]  
 HIM6A\_JM521\_A ...A--.A..G.....A.....  
 [524]  
 HTELESIPHE\_N11 ...A--.....A.....  
 [515]  
 HCLYSONIMUS\_C3037 ...A--.....A.....A.....  
 [514]

[ ]  
[ ]

CHE2A\_C140\_A TGACATG [512]  
 CHE2B\_C140\_B ..... [512]  
 CHE4A\_C201\_A ..... [512]  
 CYR1A\_N588\_A ..... [508]  
 CYR1B\_N588\_B ..... [508]  
 CYR2A\_C2861#1 ..... [512]  
 CYR2B\_C2861#2 ....TG. [520]  
 CYR3A\_PR03\_A ..... [520]  
 CYR3B\_PR03\_B ..... [520]  
 CYR5A\_PR31\_A ..... [519]  
 CYR5B\_PR31\_B ..... [512]  
 CYR6A\_PR43\_A ..... [512]

```

CYR6B_PR43_B          ..... [520]
PET1A_N7153_A         ..... [502]
PET1B_N7153_B         ..... [516]
PET3A_N7183_A         ..... [519]
PET3B_N7183_B         ..... [491]
PET4A_C2980_A         .....G. [518]
PET4B_C2980_B         .....G. [493]
PET7A_PR26_A          ..... [520]
PET7B_PR26_B          ..... [521]
HYCO2A_C455_A         ..... [520]
HYCO2B_C455_B         ..... [512]
HYCO3A_C456_A         ..... [509]
HYCO3B_C456_B         ..... [509]
HYCO4A_C457_A         ..... [526]
HYCO4B_C457_B         ..... [521]
HYTT1A_TT05_A         ..... [519]
HYTT1B_TT05_B         ..... [520]
HYTT4A_TT12_A         ..... [479]
HYTT4B_TT12_B         ..... [514]
HYFG1A_C420_A         ..... [508]
HYFG2A_C440_A         ??????? [480]
HYFG3A_C442_A         ..... [518]
HYFG4A_C444_A         ..... [520]
ERA1A_C347_A          ..... [503]
ERA2A_C348_A          ..... [514]
EMM1A_JM443_A         ??????? [516]
EMM1B_JM443_B         ..... [516]
EMM2A_JM1105_A        ..... [503]
EMM2B_JM1105_B        ...T... [510]
ETY1A_N27_A           ..... [516]
ETY1B_N27_B           ..... [515]
ETY2A_N101_A          ..... [518]
ETY2B_N101_B          ..... [518]
ETY3A_PR05_A          ..... [517]
ETY3B_PR05_B          ..... [487]
ETY4A_PR06_A          ..... [479]
ETY4B_PR06_B          ..... [479]
FAV1A_JM488_A         ..... [509]
FAV2A_JM883_A         ..... [511]
FAV4A_JM1908_A        ..... [512]
LAT1A_N2239_A         ..... [509]
LAT2A_Y30_A           ..... [479]
LAT2B_Y30_B           ..... [511]
LAT3A_Y31_A           ..... [512]
LAT3B_Y31_B           ...T... [522]
LAT4A_Y34_A           ..... [518]
LAT4B_Y34_B           ..... [521]
NOT1A_PR12_A          ..... [511]
NOT3A_PR15_A          ..... [517]
NOT3B_PR15_B          ..... [513]
NOT4A_PR114_A         ??????? [518]
NOT4B_PR114_B         ..... [534]
HIM1A_N620_A          ..... [512]
HIM2A_C2842_1         ..... [512]
HIM3A_PR18_A          ..... [514]
HIM3B_PR18_B          ..... [512]
HIM4A_PR19_A          ..... [511]
HIM5A_PR45_A          ..... [531]
HIM5B_PR45_B          ..... [531]
HIM6A_JM521_A         ..... [531]
HTELESIPHE_N11       ..... [522]
HCLYSONIMUS_C3037    ..... [521]
;
END;
BEGIN paup;
exclude 43-77 253-254 274-276 462-463 479-502;
END;
BEGIN PAUP;
lset Base=(0.4234 0.1174 0.1155) Nst=6 Rmat=(0.9016 2.4817 0.4566 1.9015
3.5899) Rates=gamma Shape=0.6014 Pinvar=0;
END;

```

## B. Alignment for *H. erato* at the *Tpi* locus

```
#NEXUS
BEGIN DATA;
  DIMENSIONS NTAX=70 NCHAR=433;
  FORMAT DATATYPE=DNA MISSING=? GAP=- MATCHCHAR=. INTERLEAVE ;
MATRIX
[
  10      20      30      40      50]
[
  .      .      .      .      .]

CHE1A_C65_A      TGGTGAAAAG GATGATCTGG TTGCTGAAAA GGTAACAACAA GCTTTT-----
  [46]
CHE2A_C140_A      .....
  [46]
CHE3A_C188_A      .....
  [46]
CHE4A_C201_A      .....
  [46]
CHE5A_C206_A      .....
  [46]
CYR2A_C2861_1     .....
  [46]
CYR2B_C2861_2     .....
  [46]
CYR3A_PR03_A      .....
  [46]
CYR4A_PR10_A      .....
  [46]
CYR5A_PR31_A      .....
  [46]
CYR6A_PR43_A      .....
  [46]
PET1A_N7153_A     ..... ACTTA
  [50]
PET2A_N7154_A     ..... ACTTA
  [50]
PET3A_N7183_A     .....G.....
  [46]
PET4A_C2980_1     .....
  [46]
PET4B_C2980_2     .....
  [46]
PET5A_C2981_1     .....
  [46]
PET5B_C2981_2     .....G.....
  [46]
PET6A_P50_A       .....
  [46]
PET7A_PR26_A      .....
  [46]
HYCO1A_C454_A     .....G.....
  [46]
HYCO1B_C454_B     .....A.....
  [46]
HYCO2A_C455_A     .....G.....
  [46]
HYCO4A_C457_A     .....
  [46]
HYTT1A_TT05_A     .....
  [46]
HYTT2A_TT06_A     .....
  [46]
HYTT2B_TT06_B     .....
  [46]
HYTT3A_TT07_A     .....
  [46]
HYTT3B_TT07_B     .....
  [46]
```

|                |  |     |  |     |  |     |      |
|----------------|--|-----|--|-----|--|-----|------|
| HYTT4A_TT12_A  |  |     |  | .G. |  |     | ---- |
| [46]           |  |     |  |     |  |     |      |
| HYFG1A_C420_A  |  |     |  | .G. |  |     | ---- |
| [46]           |  |     |  |     |  |     |      |
| HYFG2A_C440_A  |  |     |  |     |  |     | ---- |
| [46]           |  |     |  |     |  |     |      |
| HYFG2B_C440_B  |  |     |  |     |  |     | ---- |
| [46]           |  |     |  |     |  |     |      |
| HYFG3A_C442_A  |  |     |  |     |  |     | ---- |
| [46]           |  |     |  |     |  |     |      |
| HYFG3B_C442_B  |  |     |  |     |  |     | ---- |
| [46]           |  |     |  |     |  |     |      |
| ERA1A_C347_A   |  |     |  | .G. |  |     | ---- |
| [46]           |  |     |  |     |  |     |      |
| ERA2A_C348_A   |  |     |  |     |  | .A. | ---- |
| [46]           |  |     |  |     |  |     |      |
| ERA3A_C349_A   |  |     |  |     |  |     | ---- |
| [46]           |  |     |  |     |  |     |      |
| ERA3B_C349_B   |  | .G. |  |     |  |     | ---- |
| [46]           |  |     |  |     |  |     |      |
| EMM1A_JM443_A  |  |     |  |     |  | .C. | ---- |
| [46]           |  |     |  |     |  |     |      |
| EMM2A_JM1105_A |  |     |  |     |  |     | ---- |
| [46]           |  |     |  |     |  |     |      |
| ETY1A_N27_A    |  |     |  |     |  |     | ---- |
| [46]           |  |     |  |     |  |     |      |
| ETY2A_N101_A   |  |     |  |     |  |     | ---- |
| [46]           |  |     |  |     |  |     |      |
| ETY3A_PR05_A   |  |     |  |     |  | .A. | ---- |
| [46]           |  |     |  |     |  |     |      |
| ETY4A_PR06_A   |  |     |  |     |  |     | ---- |
| [46]           |  |     |  |     |  |     |      |
| FAV1A_JM488_A  |  |     |  |     |  |     | ---- |
| [46]           |  |     |  |     |  |     |      |
| FAV2A_JM883_A  |  | .A. |  |     |  |     | ---- |
| [46]           |  |     |  |     |  |     |      |
| FAV3A_JM1141_A |  | .C. |  | .G. |  |     | ---- |
| [46]           |  |     |  |     |  |     |      |
| FAV4A_JM1908_A |  |     |  |     |  |     | ---- |
| [46]           |  |     |  |     |  |     |      |
| FAV5A_JM1911_A |  |     |  |     |  | .A. | ---- |
| [46]           |  |     |  |     |  |     |      |
| LAT3A_Y31_A    |  |     |  |     |  |     | ---- |
| [46]           |  |     |  |     |  |     |      |
| LAT3B_Y31_B    |  |     |  |     |  |     | ---- |
| [46]           |  |     |  |     |  |     |      |
| LAT4A_Y34_A    |  |     |  |     |  |     | ---- |
| [46]           |  |     |  |     |  |     |      |
| NOT1A_PR12_A   |  |     |  |     |  | .A. | ---- |
| [46]           |  |     |  |     |  |     |      |
| NOT1B_PR12_B   |  |     |  |     |  | .A. | ---- |
| [46]           |  |     |  |     |  |     |      |
| NOT2A_PR13_A   |  |     |  |     |  | .A. | ---- |
| [46]           |  |     |  |     |  |     |      |
| NOT3A_PR15_A   |  |     |  |     |  |     | ---- |
| [46]           |  |     |  |     |  |     |      |
| NOT4A_PR114_A  |  |     |  |     |  | .A. | ---- |
| [46]           |  |     |  |     |  |     |      |
| HIM1A_N620_A   |  |     |  |     |  |     | ---- |
| [46]           |  |     |  |     |  |     |      |
| HIM2A_C2842_1  |  |     |  |     |  |     | ---- |
| [46]           |  |     |  |     |  |     |      |
| HIM2B_C2842_2  |  |     |  |     |  | .T. | ---- |
| [46]           |  |     |  |     |  |     |      |
| HIM3A_PR18_A   |  |     |  |     |  |     | ---- |
| [46]           |  |     |  |     |  |     |      |
| HIM4A_PR19_A   |  |     |  |     |  |     | ---- |
| [46]           |  |     |  |     |  |     |      |
| HIM5A_PR45_A   |  | .A. |  |     |  |     | ---- |
| [46]           |  |     |  |     |  |     |      |
| HIM5B_PR45_B   |  |     |  |     |  | .T. | ---- |
| [46]           |  |     |  |     |  |     |      |

```

HIM6A_JM521_A      .....-----
  [46]
HIM7A_JM522_A      .....-----
  [46]
HIM7B_JM522_B      .....-----
  [46]
H.CLYSONIMUS_C3037_1 .....-----
  [46]
H.TELESIPHE_N11_A  .....-----
  [46]

[                60          70          80          90
  [                .                .                .                .                .]

CHE1A_C65_A        -----AAGA CAGCA----- -AAGTTAAAT TTATTGT-TA
  [73]
CHE2A_C140_A        .....----- .....T..
  [74]
CHE3A_C188_A        .....----- .....T..
  [74]
CHE4A_C201_A        .....----- .....T..
  [74]
CHE5A_C206_A        .....----- .....T..
  [74]
CYR2A_C2861_1      .....----- .....T..
  [74]
CYR2B_C2861_2      .....----- .....T..
  [74]
CYR3A_PR03_A        .....C .TA.T----- .....A..C..
  [74]
CYR4A_PR10_A        .....----- .....T..
  [74]
CYR5A_PR31_A        .....----- .....T..
  [74]
CYR6A_PR43_A        .....C .TA.T----- .....A..C..
  [74]
PET1A_N7153_A      ACTTTACTTA ACAAGC.... .....----- .....T..
  [94]
PET2A_N7154_A      ACTTTACTTA ACAAGC.... .....----- .....T..
  [94]
PET3A_N7183_A        .....T.. .....----- .....T..
  [74]
PET4A_C2980_1      .....G .....----- .....T..
  [74]
PET4B_C2980_2      .....T.....----- .....T..
  [74]
PET5A_C2981_1      .....----- .....T..
  [74]
PET5B_C2981_2      .....T.. .....----- .....T..
  [74]
PET6A_P50_A         .....----- .....T..
  [74]
PET7A_PR26_A        .....----- .....T..
  [74]
HYCO1A_C454_A        .....T.. .....----- .....T..
  [74]
HYCO1B_C454_B        .....----- .....T..
  [74]
HYCO2A_C455_A        .....T.. .....----- .....T..
  [74]
HYCO4A_C457_A        .....----- .....T..
  [74]
HYTT1A_TT05_A       .....----- .....T..
  [74]
HYTT2A_TT06_A       .....----- .....T..
  [74]
HYTT2B_TT06_B       .....----- .....T..
  [74]
HYTT3A_TT07_A       .....----- .....T..
  [74]

```

|                |       |       |          |        |       |           |
|----------------|-------|-------|----------|--------|-------|-----------|
| HYTT3B_TT07_B  | ----- | ..... | .....    | .....  | ..... | T..       |
| [74]           |       |       |          |        |       |           |
| HYTT4A_TT12_A  | ----- | ..... | T..      | -----  | ..... | T..       |
| [74]           |       |       |          |        |       |           |
| HYFG1A_C420_A  | ----- | ..... | T..      | -----  | ..... | T..       |
| [74]           |       |       |          |        |       |           |
| HYFG2A_C440_A  | ----- | ..... | .....    | -----  | ..... | T..       |
| [74]           |       |       |          |        |       |           |
| HYFG2B_C440_B  | ----- | ..... | .....    | -----  | ..... | T..       |
| [74]           |       |       |          |        |       |           |
| HYFG3A_C442_A  | ----- | ..... | .....    | -----  | ..... | C..       |
| [74]           |       |       |          |        |       |           |
| HYFG3B_C442_B  | ----- | ..... | .....    | -----  | ..... | T..       |
| [74]           |       |       |          |        |       |           |
| ERA1A_C347_A   | ----- | ..... | TA.      | -----  | ..... | T..       |
| [74]           |       |       |          |        |       |           |
| ERA2A_C348_A   | ----- | ..... | .....    | -----  | ..... | T..       |
| [74]           |       |       |          |        |       |           |
| ERA3A_C349_A   | ----- | ..... | .....    | -----  | ..... | T..       |
| [74]           |       |       |          |        |       |           |
| ERA3B_C349_B   | ----- | ..... | .....    | -----  | ..... | T..       |
| [74]           |       |       |          |        |       |           |
| EMM1A_JM443_A  | ----- | ..... | G..      | -----  | ..... | T..       |
| [74]           |       |       |          |        |       |           |
| EMM2A_JM1105_A | ----- | ..... | .....    | -----  | ..... | T..       |
| [74]           |       |       |          |        |       |           |
| ETY1A_N27_A    | ----- | ..... | .....    | -----  | ..... | T..       |
| [74]           |       |       |          |        |       |           |
| ETY2A_N101_A   | ----- | ..... | G        | -----  | ..... | T..       |
| [74]           |       |       |          |        |       |           |
| ETY3A_PR05_A   | ----- | ..... | .....    | -----  | ..... | T..       |
| [74]           |       |       |          |        |       |           |
| ETY4A_PR06_A   | ----- | ..... | AA.GACAA | A..... | ..... | T..       |
| [80]           |       |       |          |        |       |           |
| FAV1A_JM488_A  | ----- | ..... | .....    | -----  | ..... | C..       |
| [74]           |       |       |          |        |       |           |
| FAV2A_JM883_A  | ----- | ..... | .....    | -----  | ..... | A.T..     |
| [74]           |       |       |          |        |       |           |
| FAV3A_JM1141_A | ----- | ..... | T..      | -----  | ..... | T..       |
| [74]           |       |       |          |        |       |           |
| FAV4A_JM1908_A | ----- | ..... | AA.GACAA | A..... | ..... | T..       |
| [80]           |       |       |          |        |       |           |
| FAV5A_JM1911_A | ----- | ..... | .....    | -----  | ..... | T..       |
| [74]           |       |       |          |        |       |           |
| LAT3A_Y31_A    | ----- | ..... | .....    | -----  | ..... | T..       |
| [74]           |       |       |          |        |       |           |
| LAT3B_Y31_B    | ----- | ..... | G        | -----  | ..... | T..       |
| [74]           |       |       |          |        |       |           |
| LAT4A_Y34_A    | ----- | ..... | .....    | -----  | ..... | A.....T.. |
| [74]           |       |       |          |        |       |           |
| NOT1A_PR12_A   | ----- | ..... | .....    | -----  | ..... | T..       |
| [74]           |       |       |          |        |       |           |
| NOT1B_PR12_B   | ----- | ..... | .....    | -----  | ..... | T..       |
| [74]           |       |       |          |        |       |           |
| NOT2A_PR13_A   | ----- | ..... | .....    | -----  | ..... | T..       |
| [74]           |       |       |          |        |       |           |
| NOT3A_PR15_A   | ----- | ..... | .....    | -----  | ..... | T..       |
| [74]           |       |       |          |        |       |           |
| NOT4A_PR114_A  | ----- | ..... | .....    | -----  | ..... | T..       |
| [74]           |       |       |          |        |       |           |
| HIM1A_N620_A   | ----- | ..... | .....    | -----  | ..... | C..       |
| [74]           |       |       |          |        |       |           |
| HIM2A_C2842_1  | ----- | ..... | .....    | -----  | ..... | C..       |
| [74]           |       |       |          |        |       |           |
| HIM2B_C2842_2  | ----- | ..... | .....    | -----  | ..... | C.....C.. |
| [74]           |       |       |          |        |       |           |
| HIM3A_PR18_A   | ----- | ..... | .....    | -----  | ..... | C..       |
| [74]           |       |       |          |        |       |           |
| HIM4A_PR19_A   | ----- | ..... | .....    | -----  | ..... | C..       |
| [74]           |       |       |          |        |       |           |
| HIM5A_PR45_A   | ----- | ..... | .....    | -----  | ..... | C..       |
| [74]           |       |       |          |        |       |           |

```

HIM5B_PR45_B      ----- ..... - .....C..
  [74]
HIM6A_JM521_A    ----- ..... - .....C..
  [74]
HIM7A_JM522_A    ----- ..... - .....C..
  [74]
HIM7B_JM522_B    ----- ..... - .....C..
  [74]
H.CLYSONIMUS_C3037_1 ----- ..C. .... - .G.....C..
  [74]
H.TELESIPHE_N11_A ----- ..C. .... - .....C..
  [74]

```

```

[           110           120           130           140
[           150]
[           .           .           .           .           .]

```

```

CHE1A_C65_A      GTATTTTCTA TGAATTACTA TAACAATTGT ATAAATAAGT TCACAAATGC
  [123]
CHE2A_C140_A     .....
  [124]
CHE3A_C188_A     .....
  [124]
CHE4A_C201_A     .....
  [124]
CHE5A_C206_A     .....
  [124]
CYR2A_C2861_1    .....T.. ..C.....
  [124]
CYR2B_C2861_2    .....T.. ..C.....
  [124]
CYR3A_PR03_A     .....T.. ..C.....
  [124]
CYR4A_PR10_A     .....T.. ..C.....
  [124]
CYR5A_PR31_A     .....T.. ..C.....
  [124]
CYR6A_PR43_A     .....T.. ..C.....
  [124]
PET1A_N7153_A    .....T.. ..C.....
  [144]
PET2A_N7154_A    .....T.. ..C.....
  [144]
PET3A_N7183_A    .....T.. ..C.....
  [124]
PET4A_C2980_1    .....T.. ..C..... ..T.....
  [124]
PET4B_C2980_2    ..G..... ..T.. ..T.....
  [124]
PET5A_C2981_1    .....T.. ..C.....
  [124]
PET5B_C2981_2    .....T.. ..C.....
  [124]
PET6A_P50_A      .....T.. ..C.....
  [124]
PET7A_PR26_A     .....T.. ..C.....
  [124]
HYCO1A_C454_A    .....T.. ..C.....
  [124]
HYCO1B_C454_B    .....A...T.. ..C..... ..T.....
  [124]
HYCO2A_C455_A    .....T.. ..C.....
  [124]
HYCO4A_C457_A    .....T.. ..C..... ..A...T.....
  [124]
HYTT1A_TT05_A    .....T.. ..C..... ..A.....
  [124]
HYTT2A_TT06_A    .....
  [124]
HYTT2B_TT06_B    .....
  [124]

```



|                |        |       |         |         |         |
|----------------|--------|-------|---------|---------|---------|
| HYTT3A_TT07_A  | .....  | ..... | .....   | .....   | .....   |
| [124]          |        |       |         |         |         |
| HYTT3B_TT07_B  | .....  | ..... | .....   | .....   | .....   |
| [124]          |        |       |         |         |         |
| HYTT4A_TT12_A  | .....  | T..   | .C..... | .....   | .....   |
| [124]          |        |       |         |         |         |
| HYFG1A_C420_A  | .....  | T..   | .C..... | .....   | .....   |
| [124]          |        |       |         |         |         |
| HYFG2A_C440_A  | .....  | T..   | .C..... | .....   | .....   |
| [124]          |        |       |         |         |         |
| HYFG2B_C440_B  | .....  | T..   | .C..... | .....   | .....   |
| [124]          |        |       |         |         |         |
| HYFG3A_C442_A  | .....  | T..   | .C..... | .....   | .....   |
| [124]          |        |       |         |         |         |
| HYFG3B_C442_B  | .....  | T..   | TC..... | .....   | .....   |
| [124]          |        |       |         |         |         |
| ERA1A_C347_A   | .....  | T..   | .C..... | .....   | .....   |
| [124]          |        |       |         |         |         |
| ERA2A_C348_A   | .....  | A.... | T..     | .C..... | .....   |
| [124]          |        |       |         |         | T.      |
| ERA3A_C349_A   | .....  | A.... | .....   | .....   | .....   |
| [124]          |        |       |         |         |         |
| ERA3B_C349_B   | .....  | ..... | T..     | .....   | .....   |
| [124]          |        |       |         |         | A.      |
| EMM1A_JM443_A  | .....  | ..... | T..     | .C..... | .....   |
| [124]          |        |       |         |         |         |
| EMM2A_JM1105_A | .....  | ..... | .....   | .....   | .....   |
| [124]          |        |       |         |         |         |
| ETY1A_N27_A    | .....  | ..... | T..     | .C..... | .....   |
| [124]          |        |       |         |         |         |
| ETY2A_N101_A   | .....  | ..... | T..     | .C..... | .....   |
| [124]          |        |       |         |         | T.      |
| ETY3A_PR05_A   | .....  | A.... | T..     | .C..... | .....   |
| [124]          |        |       |         |         | T.      |
| ETY4A_PR06_A   | A..... | ..... | T..     | .C..... | .....   |
| [130]          |        |       |         |         |         |
| FAV1A_JM488_A  | .....  | ..... | T..     | .C..... | .....   |
| [124]          |        |       |         |         |         |
| FAV2A_JM883_A  | .....  | ..... | T..     | .....   | A. .... |
| [124]          |        |       |         |         | T. .... |
| FAV3A_JM1141_A | .....  | ..... | T..     | .C..... | .....   |
| [124]          |        |       |         |         |         |
| FAV4A_JM1908_A | A..... | ..... | T..     | .C..... | .....   |
| [130]          |        |       |         |         |         |
| FAV5A_JM1911_A | .....  | A.... | T..     | .C..... | .....   |
| [124]          |        |       |         |         | T.      |
| LAT3A_Y31_A    | .....  | ..... | T..     | .C..... | .....   |
| [124]          |        |       |         |         |         |
| LAT3B_Y31_B    | .....  | ..... | T.G     | .C..... | .....   |
| [124]          |        |       |         |         | T.      |
| LAT4A_Y34_A    | .....  | ..... | T..     | .C..... | -----   |
| [101]          |        |       |         |         |         |
| NOT1A_PR12_A   | .....  | A.... | T..     | .C..... | .....   |
| [124]          |        |       |         |         | T.      |
| NOT1B_PR12_B   | .....  | A.... | T..     | .C..... | .....   |
| [124]          |        |       |         |         | T.      |
| NOT2A_PR13_A   | .....  | A.... | T..     | .C..... | .....   |
| [124]          |        |       |         |         | T.      |
| NOT3A_PR15_A   | .....  | ..... | T..     | .....   | .....   |
| [124]          |        |       |         |         |         |
| NOT4A_PR114_A  | .....  | A.... | T..     | .C..... | .....   |
| [124]          |        |       |         |         | T.      |
| HIM1A_N620_A   | .....  | ..... | T..     | .C..... | .....   |
| [124]          |        |       |         |         |         |
| HIM2A_C2842_1  | .....  | ..... | T..     | .C..... | .....   |
| [124]          |        |       |         |         |         |
| HIM2B_C2842_2  | .....  | ..... | T..     | .C..... | .....   |
| [124]          |        |       |         |         |         |
| HIM3A_PR18_A   | .....  | ..... | T..     | .C..... | .....   |
| [124]          |        |       |         |         |         |
| HIM4A_PR19_A   | .....  | ..... | T..     | .C..... | .....   |
| [124]          |        |       |         |         |         |

HIM5A\_PR45\_A .....T.. .C.....  
 [124]  
 HIM5B\_PR45\_B .....T.. .C.....  
 [124]  
 HIM6A\_JM521\_A .....T.. .C.....  
 [124]  
 HIM7A\_JM522\_A .....T.. .C.....  
 [124]  
 HIM7B\_JM522\_B .....T.. .C.....  
 [124]  
 H.CLYSONIMUS\_C3037\_1 .....TC. .C.....K. ....G.....  
 [124]  
 H.TELESIPHE\_N11\_A .....T.. .C.....A.....  
 [124]

[ 160 170 180 190  
 [ 200 ]

CHE1A\_C65\_A CATGAAAATG TGCAGGAGGA ATAATGTGGG TGGGCCAAGT TGTTCAAATG  
 [173]  
 CHE2A\_C140\_A .....  
 [174]  
 CHE3A\_C188\_A .....  
 [174]  
 CHE4A\_C201\_A .....  
 [174]  
 CHE5A\_C206\_A .....  
 [174]  
 CYR2A\_C2861\_1 .....C.....  
 [174]  
 CYR2B\_C2861\_2 .T.....T.....  
 [174]  
 CYR3A\_PR03\_A .....T.AA.....  
 [174]  
 CYR4A\_PR10\_A .....C.....  
 [174]  
 CYR5A\_PR31\_A .....  
 [174]  
 CYR6A\_PR43\_A .....T.AA.....  
 [174]  
 PET1A\_N7153\_A .....CA.....  
 [194]  
 PET2A\_N7154\_A .....CA.....  
 [194]  
 PET3A\_N7183\_A .....A.....  
 [174]  
 PET4A\_C2980\_1 .....C.....  
 [174]  
 PET4B\_C2980\_2 .....  
 [174]  
 PET5A\_C2981\_1 .....A.....  
 [174]  
 PET5B\_C2981\_2 .....  
 [174]  
 PET6A\_P50\_A .....  
 [174]  
 PET7A\_PR26\_A .....G.....  
 [174]  
 HYCO1A\_C454\_A .....  
 [174]  
 HYCO1B\_C454\_B T.....  
 [174]  
 HYCO2A\_C455\_A .....  
 [174]  
 HYCO4A\_C457\_A .....A.....  
 [174]  
 HYTT1A\_TT05\_A .....A.....  
 [174]  
 HYTT2A\_TT06\_A T.....A.....  
 [174]

|                         |                          |
|-------------------------|--------------------------|
| HYTT2B_TT06_B<br>[174]  | T.....G.....A.....       |
| HYTT3A_TT07_A<br>[174]  | T.....A.....             |
| HYTT3B_TT07_B<br>[174]  | T.....A...C.....         |
| HYTT4A_TT12_A<br>[174]  | .....                    |
| HYFG1A_C420_A<br>[171]  | .....                    |
| HYFG2A_C440_A<br>[174]  | .....T.AA.....A          |
| HYFG2B_C440_B<br>[173]  | .....A...G-...A...A..... |
| HYFG3A_C442_A<br>[174]  | .....T.AA.....A          |
| HYFG3B_C442_B<br>[173]  | .....A...G-...A...A..... |
| ERA1A_C347_A<br>[174]   | .....G.....              |
| ERA2A_C348_A<br>[174]   | T.....                   |
| ERA3A_C349_A<br>[174]   | .....A.....              |
| ERA3B_C349_B<br>[174]   | .....C.A.....            |
| EMM1A_JM443_A<br>[174]  | .....G.....              |
| EMM2A_JM1105_A<br>[174] | .....A.....              |
| ETY1A_N27_A<br>[174]    | .....                    |
| ETY2A_N101_A<br>[174]   | .....C.....A...G.....    |
| ETY3A_PR05_A<br>[174]   | T.....                   |
| ETY4A_PR06_A<br>[176]   | .....A----.....          |
| FAV1A_JM488_A<br>[174]  | .....C.A.....            |
| FAV2A_JM883_A<br>[165]  | .....-- ----.....        |
| FAV3A_JM1141_A<br>[174] | .....A.....C.....        |
| FAV4A_JM1908_A<br>[180] | .....A.....              |
| FAV5A_JM1911_A<br>[174] | T.....                   |
| LAT3A_Y31_A<br>[174]    | .....                    |
| LAT3B_Y31_B<br>[174]    | .....C.....              |
| LAT4A_Y34_A<br>[147]    | ----G.....A.....         |
| NOT1A_PR12_A<br>[174]   | T.....AA.....            |
| NOT1B_PR12_B<br>[174]   | T.....C.A.....           |
| NOT2A_PR13_A<br>[174]   | T.....                   |
| NOT3A_PR15_A<br>[173]   | .....A-.....             |
| NOT4A_PR114_A<br>[174]  | T.....                   |
| HIM1A_N620_A<br>[174]   | .....T.AA.....T...A      |
| HIM2A_C2842_1<br>[174]  | .....T.AA.....A          |
| HIM2B_C2842_2<br>[174]  | .....T.AA.....T...A      |
| HIM3A_PR18_A<br>[174]   | .....T.AA.....T...A      |

HIM4A\_PR19\_A .....T.AA. ....T....A  
 [174]  
 HIM5A\_PR45\_A .....T.AA. ....T....A  
 [174]  
 HIM5B\_PR45\_B .....T.AA. ....A  
 [174]  
 HIM6A\_JM521\_A .....T.AA. ....T....A  
 [174]  
 HIM7A\_JM522\_A .....T.AA. ....T....A  
 [174]  
 HIM7B\_JM522\_B .....T.AA. ....A  
 [174]  
 H.CLYSONIMUS\_C3037\_1 .....CA..  
 [174]  
 H.TELESIPHE\_N11\_A .....A .....C...  
 [174]

[ 210 220 230 240  
 [ 250 ]  
 [ . . . . ]

CHE1A\_C65\_A AGTAATTGTT AAGTTGGTCA ATATTTGCAT AA-----  
 [205]  
 CHE2A\_C140\_A .....  
 [206]  
 CHE3A\_C188\_A .....  
 [206]  
 CHE4A\_C201\_A .....  
 [206]  
 CHE5A\_C206\_A .....  
 [206]  
 CYR2A\_C2861\_1 .....C...  
 [206]  
 CYR2B\_C2861\_2 .....  
 [206]  
 CYR3A\_PR03\_A ..C..... GCATTGCT GTATATTACA  
 [224]  
 CYR4A\_PR10\_A .....  
 [206]  
 CYR5A\_PR31\_A .....-...T...  
 [205]  
 CYR6A\_PR43\_A ..C..... GCATTGCT GTATATTACA  
 [224]  
 PET1A\_N7153\_A .....  
 [226]  
 PET2A\_N7154\_A .....  
 [226]  
 PET3A\_N7183\_A .....  
 [206]  
 PET4A\_C2980\_1 .....A...  
 [206]  
 PET4B\_C2980\_2 ..C.-.....A...A ..TCAATGCT GTAT--TAC-  
 [220]  
 PET5A\_C2981\_1 .....C...  
 [206]  
 PET5B\_C2981\_2 .....  
 [206]  
 PET6A\_P50\_A .....  
 [206]  
 PET7A\_PR26\_A .....C...  
 [206]  
 HYCO1A\_C454\_A .....  
 [206]  
 HYCO1B\_C454\_B .....C...  
 [206]  
 HYCO2A\_C455\_A .....G...  
 [206]  
 HYCO4A\_C457\_A ..C.....A...A ..TCAATGCT GTAT--TAC-  
 [221]  
 HYTT1A\_TT05\_A .....A...G.....A ..TCAATGCT GTAT--TAC-  
 [221]

|                |          |       |       |       |       |       |
|----------------|----------|-------|-------|-------|-------|-------|
| HYTT2A_TT06_A  | .....    | ..... | ..... | ..... | ..... | ..... |
| [206]          |          |       |       |       |       |       |
| HYTT2B_TT06_B  | .....    | ..... | ..... | ..... | ..... | ..... |
| [206]          |          |       |       |       |       |       |
| HYTT3A_TT07_A  | .....    | ..... | ..... | ..... | ..... | ..... |
| [206]          |          |       |       |       |       |       |
| HYTT3B_TT07_B  | .....    | ..... | ..... | ..... | ..... | ..... |
| [206]          |          |       |       |       |       |       |
| HYTT4A_TT12_A  | .....    | ..... | ..... | ..... | ..... | ..... |
| [206]          |          |       |       |       |       |       |
| HYFG1A_C420_A  | .....    | ..... | ..... | ..... | ..... | ..... |
| [203]          |          |       |       |       |       |       |
| HYFG2A_C440_A  | .....    | ..... | ..... | ..... | ..... | ..... |
| [206]          |          |       |       |       |       |       |
| HYFG2B_C440_B  | .....    | ..... | ..... | ..... | ..... | ..... |
| [205]          |          |       |       |       |       |       |
| HYFG3A_C442_A  | .....    | ..... | ..... | ..... | ..... | ..... |
| [206]          |          |       |       |       |       |       |
| HYFG3B_C442_B  | ..C..... | ..... | ..... | ..... | ..... | ..... |
| [205]          |          |       |       |       |       |       |
| ERA1A_C347_A   | .....    | ..... | ..... | ..... | ..... | ..... |
| [206]          |          |       |       |       |       |       |
| ERA2A_C348_A   | .....    | ..... | ..... | ..... | ..... | ..... |
| [206]          |          |       |       |       |       |       |
| ERA3A_C349_A   | .....    | ..... | ..... | ..... | ..... | ..... |
| [206]          |          |       |       |       |       |       |
| ERA3B_C349_B   | .....    | ..... | ..... | ..... | ..... | ..... |
| [206]          |          |       |       |       |       |       |
| EMM1A_JM443_A  | .....    | ..... | ..... | ..... | ..... | ..... |
| [206]          |          |       |       |       |       |       |
| EMM2A_JM1105_A | .....    | ..... | ..... | ..... | ..... | ..... |
| [206]          |          |       |       |       |       |       |
| ETY1A_N27_A    | .....    | ..... | ..... | ..... | ..... | ..... |
| [206]          |          |       |       |       |       |       |
| ETY2A_N101_A   | .....    | ..... | ..... | ..... | ..... | ..... |
| [206]          |          |       |       |       |       |       |
| ETY3A_PR05_A   | .....    | ..... | ..... | ..... | ..... | ..... |
| [206]          |          |       |       |       |       |       |
| ETY4A_PR06_A   | .....    | ..... | ..... | ..... | ..... | ..... |
| [208]          |          |       |       |       |       |       |
| FAV1A_JM488_A  | ..C..... | ..... | ..... | ..... | ..... | ..... |
| [224]          |          |       |       |       |       |       |
| FAV2A_JM883_A  | .....    | ..... | ..... | ..... | ..... | ..... |
| [197]          |          |       |       |       |       |       |
| FAV3A_JM1141_A | .....    | ..... | ..... | ..... | ..... | ..... |
| [206]          |          |       |       |       |       |       |
| FAV4A_JM1908_A | .....    | ..... | ..... | ..... | ..... | ..... |
| [212]          |          |       |       |       |       |       |
| FAV5A_JM1911_A | .....    | ..... | ..... | ..... | ..... | ..... |
| [206]          |          |       |       |       |       |       |
| LAT3A_Y31_A    | .....    | ..... | ..... | ..... | ..... | ..... |
| [206]          |          |       |       |       |       |       |
| LAT3B_Y31_B    | .....    | ..... | ..... | ..... | ..... | ..... |
| [206]          |          |       |       |       |       |       |
| LAT4A_Y34_A    | .....    | ..... | ..... | ..... | ..... | ..... |
| [179]          |          |       |       |       |       |       |
| NOT1A_PR12_A   | .....    | ..... | ..... | ..... | ..... | ..... |
| [206]          |          |       |       |       |       |       |
| NOT1B_PR12_B   | ..C..... | ..... | ..... | ..... | ..... | ..... |
| [221]          |          |       |       |       |       |       |
| NOT2A_PR13_A   | .....    | ..... | ..... | ..... | ..... | ..... |
| [206]          |          |       |       |       |       |       |
| NOT3A_PR15_A   | .....    | ..... | ..... | ..... | ..... | ..... |
| [205]          |          |       |       |       |       |       |
| NOT4A_PR114_A  | .....    | ..... | ..... | ..... | ..... | ..... |
| [206]          |          |       |       |       |       |       |
| HIM1A_N620_A   | .....    | ..... | ..... | ..... | ..... | ..... |
| [206]          |          |       |       |       |       |       |
| HIM2A_C2842_1  | .....    | ..... | ..... | ..... | ..... | ..... |
| [206]          |          |       |       |       |       |       |
| HIM2B_C2842_2  | .....    | ..... | ..... | ..... | ..... | ..... |
| [206]          |          |       |       |       |       |       |

```

HIM3A_PR18_A      .....C. ....
  [206]
HIM4A_PR19_A      .....C. ....
  [206]
HIM5A_PR45_A      .....C. ....
  [206]
HIM5B_PR45_B      .....C. ....
  [206]
HIM6A_JM521_A     .....C. ....
  [206]
HIM7A_JM522_A     .....C. ....
  [206]
HIM7B_JM522_B     .....C. ....
  [206]
H.CLYSONIMUS_C3037_1 G..... ..GCATTGCT GTAT--TAC-
  [221]
H.TELESIPHE_N11_A ..C..... .C..... ..GCAATGCT GTAT--TAC-
  [221]

```

```

[                260          270          280          290
[          300]
[                .                .                .                .                .]

```

```

CHE1A_C65_A      -----CAG GCATATAATA TTTAAACTAA TATATTAAAA ATAAACTAAT
  [248]
CHE2A_C140_A     -----
  [249]
CHE3A_C188_A     -----
  [249]
CHE4A_C201_A     -----
  [249]
CHE5A_C206_A     -----
  [249]
CYR2A_C2861_1    ----- .A... .G.....
  [240]
CYR2B_C2861_2    ----- .A... .G.....
  [240]
CYR3A_PR03_A     TTACACA... ..T... ..G.....
  [274]
CYR4A_PR10_A     ----- ..G.....
  [249]
CYR5A_PR31_A     ----- ..G.....
  [239]
CYR6A_PR43_A     TTACACA... ..T... ..G.....
  [274]
PET1A_N7153_A    ----- ..C... ..G.....
  [269]
PET2A_N7154_A    ----- ..C... ..G.....
  [269]
PET3A_N7183_A    ----- ..A... ..G.....
  [249]
PET4A_C2980_1    ----- ..G.....
  [249]
PET4B_C2980_2    -----CA... ..G.....
  [265]
PET5A_C2981_1    ----- ..G.....
  [249]
PET5B_C2981_2    ----- .A... ..A... ..G.....
  [249]
PET6A_P50_A      ----- ..G.....
  [240]
PET7A_PR26_A     ----- ..G.....
  [249]
HYCO1A_C454_A    ----- .A... ..A... ..CG.....
  [249]
HYCO1B_C454_B    ----- ..A... ..G...C. ....
  [249]
HYCO2A_C455_A    ----- ..G.....
  [249]
HYCO4A_C457_A    -----CA... ..G... ..T...
  [265]

```

|                         |                                  |
|-------------------------|----------------------------------|
| HYTT1A_TT05_A<br>[266]  | -----CA... ..G... ..T...         |
| HYTT2A_TT06_A<br>[249]  | -----... ..G... ..G... ..        |
| HYTT2B_TT06_B<br>[249]  | -----... ..G... ..G... ..        |
| HYTT3A_TT07_A<br>[249]  | -----... ..G... ..G... ..        |
| HYTT3B_TT07_B<br>[249]  | -----... ..G... ..G... ..        |
| HYTT4A_TT12_A<br>[249]  | -----... ..A... ..G... ..        |
| HYFG1A_C420_A<br>[246]  | -----... ..G... ..               |
| HYFG2A_C440_A<br>[249]  | -----... ..C... ..G... ..        |
| HYFG2B_C440_B<br>[248]  | -----... ..T... ..G... ..        |
| HYFG3A_C442_A<br>[249]  | -----... ..G... ..               |
| HYFG3B_C442_B<br>[248]  | -----... ..T... ..G... ..        |
| ERA1A_C347_A<br>[240]   | -----... ..G... ..               |
| ERA2A_C348_A<br>[249]   | -----... ..A... ..G... ..C... .. |
| ERA3A_C349_A<br>[249]   | -----... ..G... ..               |
| ERA3B_C349_B<br>[249]   | -----... ..G... ..               |
| EMM1A_JM443_A<br>[249]  | -----... ..G... ..               |
| EMM2A_JM1105_A<br>[249] | -----... ..G... ..               |
| ETY1A_N27_A<br>[249]    | -----... ..G... ..               |
| ETY2A_N101_A<br>[249]   | -----... ..G... ..               |
| ETY3A_PR05_A<br>[249]   | -----... ..A... ..G... ..C... .. |
| ETY4A_PR06_A<br>[251]   | -----... ..G... ..               |
| FAV1A_JM488_A<br>[274]  | TTACACA... ..A... ..G... ..      |
| FAV2A_JM883_A<br>[240]  | -----... ..C... ..G... ..        |
| FAV3A_JM1141_A<br>[249] | -----... ..G... ..               |
| FAV4A_JM1908_A<br>[255] | -----... ..G... ..               |
| FAV5A_JM1911_A<br>[249] | -----... ..G... ..G... ..        |
| LAT3A_Y31_A<br>[249]    | -----... ..G... ..               |
| LAT3B_Y31_B<br>[249]    | -----... ..G... ..               |
| LAT4A_Y34_A<br>[222]    | -----... ..G... ..               |
| NOT1A_PR12_A<br>[249]   | -----... ..A... ..G... ..C... .. |
| NOT1B_PR12_B<br>[266]   | -----CA... ..G... ..             |
| NOT2A_PR13_A<br>[249]   | -----... ..A... ..G... ..C... .. |
| NOT3A_PR15_A<br>[248]   | -----... ..G... ..               |
| NOT4A_PR114_A<br>[249]  | -----... ..A... ..G... ..C... .. |
| HIM1A_N620_A<br>[249]   | -----... ..G... ..               |
| HIM2A_C2842_1<br>[249]  | -----... ..G... ..               |

HIM2B\_C2842\_2 [249] ----- . . . . .G. . . . .

HIM3A\_PR18\_A [249] ----- . . . . .G. . . . .

HIM4A\_PR19\_A [249] ----- . . . . .G. . . . .

HIM5A\_PR45\_A [249] ----- . . . . .G. . . . .

HIM5B\_PR45\_B [249] ----- . . . . .G. . . . .

HIM6A\_JM521\_A [249] ----- . . . . .G. . . . .

HIM7A\_JM522\_A [249] ----- . . . . .G. . . . .

HIM7B\_JM522\_B [249] ----- . . . . .G. . . . .

H. CLYSONIMUS\_C3037\_1 [266] -----CA. . . . .C. . . . .G. .G. .

H. TELESIPHE\_N11\_A [266] -----AA. . . . .C. . . . .G. .G. .

[ 310 320 330 340 ]

[ 350 ]

CHE1A\_C65\_A [298] ATATTTTCAGG TGGCCCATGC CCTTGAATGT GGTTTAAAAG TGATTGCCTG

CHE2A\_C140\_A [299] . . . . .

CHE3A\_C188\_A [299] . . . . .

CHE4A\_C201\_A [299] . . . . .

CHE5A\_C206\_A [299] . . . . .

CYR2A\_C2861\_1 [290] . . . . .

CYR2B\_C2861\_2 [290] . . . . .

CYR3A\_PR03\_A [324] . . . . .

CYR4A\_PR10\_A [299] . . . . .

CYR5A\_PR31\_A [289] . . . . .

CYR6A\_PR43\_A [324] . . . . .

PET1A\_N7153\_A [319] . . . . .

PET2A\_N7154\_A [319] . . . . .

PET3A\_N7183\_A [299] . . . . .G. . . . .

PET4A\_C2980\_1 [299] . . . . .

PET4B\_C2980\_2 [315] . . . . .G. . . . .A. . . . .

PET5A\_C2981\_1 [299] . . . . .G. . . . .

PET5B\_C2981\_2 [299] . . . . .G. . . . .

PET6A\_P50\_A [290] . . . . .

PET7A\_PR26\_A [299] . . . . .

HYCO1A\_C454\_A [299] . . . . .G. . . . .

HYCO1B\_C454\_B [299] . . . . .A. . . . .

HYCO2A\_C455\_A [299] . . . . .G. . . . .



|                         |                   |                   |                     |
|-------------------------|-------------------|-------------------|---------------------|
| HYCO4A_C457_A<br>[315]  | . . . C . . . . . | . . . G . . . . . | . . . A . . . . .   |
| HYTT1A_TT05_A<br>[316]  | . . . C . . . . . | . . . G . . . . . | . . . A . . . . .   |
| HYTT2A_TT06_A<br>[299]  | . . . . .         | . . . . .         | . . . . .           |
| HYTT2B_TT06_B<br>[299]  | . . . . .         | . . . . .         | . . . . .           |
| HYTT3A_TT07_A<br>[299]  | . . . . .         | . . . . .         | . . . . .           |
| HYTT3B_TT07_B<br>[299]  | . . . . .         | . . . . .         | . . . . .           |
| HYTT4A_TT12_A<br>[299]  | . . . . .         | . . . . .         | . . . G . . . . .   |
| HYFG1A_C420_A<br>[296]  | . . . . .         | . . . . .         | . . . . .           |
| HYFG2A_C440_A<br>[299]  | . . . . .         | . . . C . . . . . | . . . . .           |
| HYFG2B_C440_B<br>[298]  | . . . . .         | . . . C . . . . . | . . . . .           |
| HYFG3A_C442_A<br>[299]  | . . . . .         | . . . C . . . . . | . . . . .           |
| HYFG3B_C442_B<br>[298]  | . . . . .         | . . . C . . . . . | . . . . .           |
| ERA1A_C347_A<br>[290]   | . . . . .         | . . . . .         | . . . G . . . . .   |
| ERA2A_C348_A<br>[299]   | . . . . .         | . . . . .         | . . . A . . . . .   |
| ERA3A_C349_A<br>[299]   | . C . . . . .     | . . . . .         | . . . . .           |
| ERA3B_C349_B<br>[299]   | . C . . . . .     | . . . . .         | . . . . .           |
| EMM1A_JM443_A<br>[299]  | . . . . .         | . . . . .         | . . . . .           |
| EMM2A_JM1105_A<br>[299] | . . . . .         | . T . . . . .     | . . . G . . . . .   |
| ETY1A_N27_A<br>[299]    | . . . . .         | . . . . .         | . . . . .           |
| ETY2A_N101_A<br>[299]   | . . . . .         | . . . . .         | . . . . A . . . . . |
| ETY3A_PR05_A<br>[299]   | . . . . .         | . . . . .         | . . . A . . . . .   |
| ETY4A_PR06_A<br>[301]   | . . . . .         | . . . . .         | . . . . .           |
| FAV1A_JM488_A<br>[324]  | . . . . .         | . . . . .         | . . . . .           |
| FAV2A_JM883_A<br>[290]  | . . . . .         | . T . . . . .     | . . . G . . . . .   |
| FAV3A_JM1141_A<br>[299] | . . . . .         | . . . . .         | . . . . .           |
| FAV4A_JM1908_A<br>[305] | . . . . .         | . C . . . . .     | . . . . .           |
| FAV5A_JM1911_A<br>[299] | . . . . .         | . . . . .         | . . . A . . . . .   |
| LAT3A_Y31_A<br>[299]    | . . . . .         | . . . . .         | . . . G . . . . .   |
| LAT3B_Y31_B<br>[299]    | . . . . .         | . . . . .         | . . . . .           |
| LAT4A_Y34_A<br>[272]    | . . . . .         | . . . . .         | . . . . .           |
| NOT1A_PR12_A<br>[299]   | . . . . .         | . . . . .         | . . . A . . . . .   |
| NOT1B_PR12_B<br>[316]   | . . . . .         | . . . . .         | . . . . A . . . . . |
| NOT2A_PR13_A<br>[299]   | . . . . .         | . . . . .         | . . . A . . . . .   |
| NOT3A_PR15_A<br>[298]   | . . . . .         | . . . . .         | . . . . .           |
| NOT4A_PR114_A<br>[299]  | . . . . .         | . . . . .         | . . . A . . . . .   |
| HIM1A_N620_A<br>[299]   | . . . . .         | . T . . . . .     | . . . . .           |

HIM2A\_C2842\_1 ..... T.....  
 [299]  
 HIM2B\_C2842\_2 ..... T.....  
 [299]  
 HIM3A\_PR18\_A ..... T.....  
 [299]  
 HIM4A\_PR19\_A ..... T.....  
 [299]  
 HIM5A\_PR45\_A ..... T.....  
 [299]  
 HIM5B\_PR45\_B ..... T.....  
 [299]  
 HIM6A\_JM521\_A ..... T.....  
 [299]  
 HIM7A\_JM522\_A ..... T.....G.....  
 [299]  
 HIM7B\_JM522\_B ..... T.....  
 [299]  
 H.CLYSONIMUS\_C3037\_1 .....  
 [316]  
 H.TELESIPHE\_N11\_A .....G.....  
 [316]

[ ..... 360 ..... 370 ..... 380 ..... 390 .....  
 [ 400] ..... ]

CHE1A\_C65\_A ..... CATAGGTGAA ACTTTAGAAG AAAGGGAGGC GGGTAAAACT GAGGAAGTGG  
 [348]  
 CHE2A\_C140\_A .....  
 [349]  
 CHE3A\_C188\_A ..... T.....  
 [349]  
 CHE4A\_C201\_A .....  
 [349]  
 CHE5A\_C206\_A .....  
 [349]  
 CYR2A\_C2861\_1 .....G.....  
 [340]  
 CYR2B\_C2861\_2 .....G.....  
 [340]  
 CYR3A\_PR03\_A .....  
 [374]  
 CYR4A\_PR10\_A .....G..A.....C.....  
 [349]  
 CYR5A\_PR31\_A .....G..A.....  
 [339]  
 CYR6A\_PR43\_A .....  
 [374]  
 PET1A\_N7153\_A .....G..A.....C.....  
 [369]  
 PET2A\_N7154\_A .....G..A.....C.....  
 [369]  
 PET3A\_N7183\_A .....T.....C.....G.....G.....  
 [349]  
 PET4A\_C2980\_1 .....C.....  
 [349]  
 PET4B\_C2980\_2 .....G.....  
 [365]  
 PET5A\_C2981\_1 .....T.....G.....C.....  
 [349]  
 PET5B\_C2981\_2 .....T.....C.....G.....G.....  
 [349]  
 PET6A\_P50\_A .....G.....  
 [340]  
 PET7A\_PR26\_A .....T.....G.....C.....  
 [349]  
 HYCO1A\_C454\_A .....T.....C.....G.....G.....  
 [349]  
 HYCO1B\_C454\_B .....G.....  
 [349]

|                         |           |         |             |             |
|-------------------------|-----------|---------|-------------|-------------|
| HYCO2A_C455_A<br>[349]  | .....     | .....   | .....       | .....       |
| HYCO4A_C457_A<br>[365]  | .....     | .G..... | A.....      | .....       |
| HYTT1A_TT05_A<br>[366]  | .....     | .G..... | A.....      | .....       |
| HYTT2A_TT06_A<br>[349]  | .....     | .G..... | A.....      | .....       |
| HYTT2B_TT06_B<br>[349]  | .....     | .G..... | A.....      | .....       |
| HYTT3A_TT07_A<br>[349]  | .....     | .G..... | A.....      | .....       |
| HYTT3B_TT07_B<br>[349]  | .....     | .C..... | .G.....     | A.....      |
| HYTT4A_TT12_A<br>[349]  | T.....    | C.....  | .G.....     | .....       |
| HYFG1A_C420_A<br>[346]  | .....     | .....   | .G.....     | ...C.....   |
| HYFG2A_C440_A<br>[349]  | .....     | .....   | .T...G..... | ...G.....   |
| HYFG2B_C440_B<br>[348]  | .....     | .....   | .G.....     | .....       |
| HYFG3A_C442_A<br>[349]  | .....     | .....   | .G.....     | .....       |
| HYFG3B_C442_B<br>[348]  | .....     | .....   | .G.....     | .....       |
| ERA1A_C347_A<br>[340]   | T.....    | C.....  | .G.....     | .....       |
| ERA2A_C348_A<br>[349]   | .....     | .....   | .G.....     | .....       |
| ERA3A_C349_A<br>[349]   | .....     | .....   | .....       | .....       |
| ERA3B_C349_B<br>[349]   | .....     | .....   | .....       | .....       |
| EMM1A_JM443_A<br>[349]  | ...T..... | .....   | .G..A.....  | ...C.....   |
| EMM2A_JM1105_A<br>[349] | T.....    | C.....  | .G.....     | .....       |
| ETY1A_N27_A<br>[349]    | .....     | .....   | .G..A.....  | ...C.....   |
| ETY2A_N101_A<br>[349]   | .....     | .....   | .G.....     | A.....      |
| ETY3A_PR05_A<br>[349]   | .....     | .....   | .G.....     | .....       |
| ETY4A_PR06_A<br>[351]   | .....     | .....   | .G.....     | ...C.....   |
| FAV1A_JM488_A<br>[374]  | .....     | .....   | .G..A.....  | ...C.....   |
| FAV2A_JM883_A<br>[340]  | T.....    | C.....  | .G.....     | .....       |
| FAV3A_JM1141_A<br>[349] | .....     | .....   | .G.....     | .....A..... |
| FAV4A_JM1908_A<br>[355] | .....     | .....   | .G.....     | ...C.....   |
| FAV5A_JM1911_A<br>[349] | T.....    | .....   | .G..A.....  | ...C.....   |
| LAT3A_Y31_A<br>[349]    | T.....    | C.....  | .G.....     | A.....      |
| LAT3B_Y31_B<br>[349]    | .....     | .....   | .G.....     | ...C.....   |
| LAT4A_Y34_A<br>[322]    | .....     | .....   | .G.....     | A.....      |
| NOT1A_PR12_A<br>[349]   | .....     | .....   | .G.....     | .....       |
| NOT1B_PR12_B<br>[366]   | .....     | .....   | .G.....     | A.....      |
| NOT2A_PR13_A<br>[349]   | .....     | .....   | .G.....     | .....       |
| NOT3A_PR15_A<br>[348]   | .....     | .....   | .....       | .....       |
| NOT4A_PR114_A<br>[349]  | .....     | .....   | .G.....     | .....       |

HIM1A\_N620\_A .....G.....  
 [349]  
 HIM2A\_C2842\_1 .....G.....T.....  
 [349]  
 HIM2B\_C2842\_2 .....G.....  
 [349]  
 HIM3A\_PR18\_A .....G.....  
 [349]  
 HIM4A\_PR19\_A .....G.....  
 [349]  
 HIM5A\_PR45\_A .....G.....  
 [349]  
 HIM5B\_PR45\_B .....G.....  
 [349]  
 HIM6A\_JM521\_A .....G.....  
 [349]  
 HIM7A\_JM522\_A .....G.....  
 [349]  
 HIM7B\_JM522\_B .....G.....  
 [349]  
 H.CLYSONIMUS\_C3037\_1 .....G.....A..A.....C.  
 [366]  
 H.TELESIPHE\_N11\_A .....G..A.....A.....  
 [366]

[ 410 420 430 ]  
 [ . . . ]

CHE1A\_C65\_A TG TTCAGACA AACTAAGGCT CTATTGCCTG CTA [381]  
 CHE2A\_C140\_A ..... [382]  
 CHE3A\_C188\_A ..... [382]  
 CHE4A\_C201\_A ..... [382]  
 CHE5A\_C206\_A ..... [382]  
 CYR2A\_C2861\_1 ..... [373]  
 CYR2B\_C2861\_2 ..... [373]  
 CYR3A\_PR03\_A .....C. [407]  
 CYR4A\_PR10\_A .....A ..... [382]  
 CYR5A\_PR31\_A .....A .....C. [372]  
 CYR6A\_PR43\_A .....A .....C. [407]  
 PET1A\_N7153\_A .....A ..... [402]  
 PET2A\_N7154\_A .....A ..... [402]  
 PET3A\_N7183\_A .....A .....C. [382]  
 PET4A\_C2980\_1 .....C ..... [382]  
 PET4B\_C2980\_2 ..... [398]  
 PET5A\_C2981\_1 .....A .....C. [382]  
 PET5B\_C2981\_2 .....A .....C. [382]  
 PET6A\_P50\_A .....A .....C. [373]  
 PET7A\_PR26\_A .....A .....C. [382]  
 HYCO1A\_C454\_A .....A .....C. [382]  
 HYCO1B\_C454\_B ..... [382]  
 HYCO2A\_C455\_A ..... [382]  
 HYCO4A\_C457\_A .....A .....C. [398]  
 HYTT1A\_TT05\_A .....A .....C. [399]  
 HYTT2A\_TT06\_A ..... [382]  
 HYTT2B\_TT06\_B ..... [382]  
 HYTT3A\_TT07\_A ..... [382]  
 HYTT3B\_TT07\_B ..... [382]  
 HYTT4A\_TT12\_A .....A .....C. [382]  
 HYFG1A\_C420\_A .....A .....C. [379]  
 HYFG2A\_C440\_A .....G.....G..... [382]  
 HYFG2B\_C440\_B ..... [381]  
 HYFG3A\_C442\_A ..... [382]  
 HYFG3B\_C442\_B ..... [381]  
 ERA1A\_C347\_A ..... [373]  
 ERA2A\_C348\_A .....A .....C. [382]  
 ERA3A\_C349\_A ..... [382]  
 ERA3B\_C349\_B ..... [382]  
 EMM1A\_JM443\_A .....A .....C. [382]  
 EMM2A\_JM1105\_A .....A .....C. [382]  
 ETY1A\_N27\_A .....A .....C. [382]  
 ETY2A\_N101\_A ..... [382]  
 ETY3A\_PR05\_A .....A .....C. [382]

```

ETY4A_PR06_A          ..... [384]
FAV1A_JM488_A        ..... [407]
FAV2A_JM883_A        ..... G. .... .C. [373]
FAV3A_JM1141_A       .....A ..... .C. [382]
FAV4A_JM1908_A       ..... [388]
FAV5A_JM1911_A       .....A ..... .C. [382]
LAT3A_Y31_A          ..... [382]
LAT3B_Y31_B          ....T.....A ..... .C. [382]
LAT4A_Y34_A          ..... [355]
NOT1A_PR12_A         .....A ..... .C. [382]
NOT1B_PR12_B         ..... [399]
NOT2A_PR13_A         .....A ..... .C. [382]
NOT3A_PR15_A         .....A ..... .C. [381]
NOT4A_PR114_A        .....A ..... .C. [382]
HIM1A_N620_A         ..... [382]
HIM2A_C2842_1        ..... [382]
HIM2B_C2842_2        ..... [382]
HIM3A_PR18_A         ..... [382]
HIM4A_PR19_A         ..... [382]
HIM5A_PR45_A         ..... [382]
HIM5B_PR45_B         ..... [382]
HIM6A_JM521_A        ..... [382]
HIM7A_JM522_A        ..... [382]
HIM7B_JM522_B        ..... [382]
H.CLYSONIMUS_C3037_1 ..... [399]
H.TELESIPHE_N11_A    ..... [399]
;
END;
BEGIN PAUP;
Lset Base=(0.3765 0.1271 0.1897) Nst=6 Rmat=(1.0000 4.0187 1.0000 1.0000
      8.0465) Rates=gamma Shape=0.8850 Pinvar=0.3402;
END;

```

### C. Alignment for *H. melpomene* at the *Mpi* locus

```

#NEXUS

BEGIN DATA;
  DIMENSIONS NTAX=57 NCHAR=498;
  FORMAT DATATYPE=DNA MISSING=? GAP=- MATCHCHAR=. INTERLEAVE ;
MATRIX

[          10          20          30          40
50]
[          .          .          .          .          .]

CYTH1A_N1379_A      TTTATCCATT CAAGCTCATC CAACTAAGGT ATGTATGATG TATAAAAATA
[50]
CYTH1B_N1379_B      .....G. ....
[50]
CYTH2A_N1378_A      .....
[50]
CYTH3A_N1051_A      .....
[50]
CYTH3B_N1051_B      .....CTAA ATA.....
[50]
ROS1A_C811#1        .....
[50]
ROS1B_C811#2        .....CTAA ATA.....
[50]
ROS2A_C544_A        .....
[50]
ROS2B_C544_B        .....
[50]
ROS3A_C1652_A      .....CTAA ATA.....
[50]
ROS3B_C1652_B      .....
[50]
ROS4A_C841_A        .....--- .....
[47]

```

|                 |             |          |          |
|-----------------|-------------|----------|----------|
| ROS4B_C841_B    | .....       |          |          |
| [50]            |             |          |          |
| MELCO2A_C422_A  | .....       |          |          |
| [50]            |             |          |          |
| MELCO2B_C422_B  | .....       |          |          |
| [50]            |             |          |          |
| MELCO3A_C11_A   | .....       |          |          |
| [50]            |             |          |          |
| MELTT1A_TT03_A  | .....       |          |          |
| [47]            |             |          |          |
| MELTT1B_TT03_B  | ..G.....    |          |          |
| [47]            |             |          |          |
| MELTT2A_TT04_A  | .....       |          |          |
| [47]            |             |          |          |
| MELTT2B_TT04_B  | ..G.....    |          |          |
| [47]            |             |          |          |
| MELTT3A_TT14_A  | .....       |          |          |
| [47]            |             |          |          |
| MELTT3B_TT14_B  | .....       |          |          |
| [47]            |             |          |          |
| MELFG1A_C436_A  | ..G.....    |          |          |
| [47]            |             |          |          |
| MELFG1B_C436_B  | ..G.....    |          |          |
| [47]            |             |          |          |
| MELFG2A_C437_A  | ..G.....    |          |          |
| [47]            |             |          |          |
| MELFG3A_C528_A  | ..G.....    |          |          |
| [47]            |             |          |          |
| MELFG3B_C528_B  | ..G.....    |          |          |
| [47]            |             |          |          |
| MELFG4A_C1384_A | .....       |          |          |
| [47]            |             |          |          |
| MELFG4B_C1384_B | .....       |          |          |
| [47]            |             |          |          |
| THEL4A_FG118_A  | .....       |          |          |
| [47]            |             |          |          |
| THEL4B_FG118_B  | ..G.....    |          | ..G..... |
| [47]            |             |          |          |
| THEL2A_FG90_A   | .....       |          |          |
| [47]            |             |          |          |
| THEL2B_FG90_B   | ..G.....    |          |          |
| [47]            |             |          |          |
| THEL3A_FG104_A  | .....       |          |          |
| [47]            |             |          |          |
| THEL3B_FG104_B  | .....       |          |          |
| [47]            |             |          |          |
| MAL1A_N4026_A   | .....       |          |          |
| [47]            |             |          |          |
| MAL1B_N4026_B   | .....G..... | ..T..... |          |
| [47]            |             |          |          |
| MAL2A_N4027_A   | .....       |          |          |
| [47]            |             |          |          |
| MAL2B_N4027_B   | .....       |          |          |
| [47]            |             |          |          |
| ECUA1A_C428_A   | .....       |          |          |
| [47]            |             |          |          |
| ECUA2A_C2417_A  | .....       |          |          |
| [47]            |             |          |          |
| ECUA2B_C2417_B  | .....       |          |          |
| [47]            |             |          |          |
| AMAR1A_JM1916_A | .....       |          |          |
| [47]            |             |          |          |
| AMAR2A_JM1917_A | .....       |          |          |
| [47]            |             |          |          |
| AMAR3A_JM1271_A | .....       |          |          |
| [47]            |             |          |          |
| AGLA2A_JM1174_A | .....       |          |          |
| [47]            |             |          |          |
| AGLA2B_JM1174_B | ..G.....    |          |          |
| [47]            |             |          |          |
| AGLA3A_JM1178_A | .....       |          |          |
| [47]            |             |          |          |

```

PLES2A_C2397_A .....--- .....
[47]
PLES3A_C2429_A .....--- .....
[47]
PLES3B_C2429_B .....
[50]
CYDNO1A_553_A .....
[50]
CYDNO2A_570_A ...G.....--- .....
[47]
CYDNO4A_N1047_A .....
[50]
CYDNO5_STRIB809#2 ?.....T.....CTAA ATA.....
[50]
H.HECALE_Y5_A .....C.....--- .....
[47]
H.HECALE_Y5_B .....C.....--- .....
[47]

[          60          70          80          90
100]
[          .          .          .          .          .]

CYTH1A_N1379_A ---ATTTATG ATATTTCTCC TTGTGTCAAT CATTTAATGT TTCATAA---
[94]
CYTH1B_N1379_B ---.....---
[94]
CYTH2A_N1378_A ---.....---
[94]
CYTH3A_N1051_A ---.....---
[93]
CYTH3B_N1051_B TAT..... T.....C.....----.....G.....---
[92]
ROS1A_C811#1 ---.....---
[94]
ROS1B_C811#2 TAT..... T.....C.....----.....G.....---
[92]
ROS2A_C544_A ---.....---
[94]
ROS2B_C544_B ---.....---
[94]
ROS3A_C1652_A TAT..... T.....C.....----.....G.....---
[92]
ROS3B_C1652_B ---.....---
[94]
ROS4A_C841_A ---..... T.....TAT
[94]
ROS4B_C841_B ---.....---
[93]
MELCO2A_C422_A ---.....C.....---
[94]
MELCO2B_C422_B ---.....---
[94]
MELCO3A_C11_A ---.....C.....---
[94]
MELTT1A_TT03_A ---..... T.....A .....---
[91]
MELTT1B_TT03_B ---.....---
[91]
MELTT2A_TT04_A ---..... T.....A .....---
[91]
MELTT2B_TT04_B ---.....---
[91]
MELTT3A_TT14_A ---..... T.....A .....---
[91]
MELTT3B_TT14_B ---..... T.....A .....---
[91]
MELFG1A_C436_A ---.....---
[91]
MELFG1B_C436_B ---.....---
[91]

```

```

MELFG2A_C437_A      ---.....
[91]
MELFG3A_C528_A      ---.....
[91]
MELFG3B_C528_B      ---.....
[91]
MELFG4A_C1384_A     ---..... T..... A .....
[91]
MELFG4B_C1384_B     ---.....
[91]
THEL4A_FG118_A      ---..... T..... A .....
[91]
THEL4B_FG118_B      ---.....
[91]
THEL2A_FG90_A       ---..... T..... A .....
[91]
THEL2B_FG90_B       ---..... .C.....
[91]
THEL3A_FG104_A      ---..... T..... A .....
[91]
THEL3B_FG104_B      ---..... T..... A .....
[91]
MAL1A_N4026_A       ---..... T..... A .....
[91]
MAL1B_N4026_B       ---..... T..... A .....
[91]
MAL2A_N4027_A       ---..... T..... A .....
[91]
MAL2B_N4027_B       ---..... T..... A ..... .AT.....
[91]
ECUA1A_C428_A       ---...A... T..... A .....
[91]
ECUA2A_C2417_A      ---..... T..... A .....
[91]
ECUA2B_C2417_B      ---..... T..... A .....
[91]
AMAR1A_JM1916_A     ---..... T..... A .....
[91]
AMAR2A_JM1917_A     ---...A... T..... A .....
[91]
AMAR3A_JM1271_A     ---..... T..... A .....
[91]
AGLA2A_JM1174_A     ---..... T..... A .....
[91]
AGLA2B_JM1174_B     ---...A... T..... A .....
[91]
AGLA3A_JM1178_A     ---..... T..... A .....
[91]
PLES2A_C2397_A      ---..... T..... A .....
[91]
PLES3A_C2429_A      ---..... T..... A ..... .AT.....
[91]
PLES3B_C2429_B      ---..... .C.....
[94]
CYDNO1A__553_A      ---.....
[94]
CYDNO2A_570_A       ---..... T..... .TAT
[94]
CYDNO4A_N1047_A     ---.....
[91]
CYDNO5_STRIB809#2   TAT..... T..... .C..... ----- G.....
[92]
H.HECALE_Y5_A       ---..... T.....
[91]
H.HECALE_Y5_B       ---..... T..... .A.....
[91]

[                               110           120           130           140
150]
[                               .           .           .           .           .]

```



|                 |            |            |            |            |            |
|-----------------|------------|------------|------------|------------|------------|
| CYTH1A_N1379_A  | -----      | -----      | -----      | -----      | -----      |
| [94]            |            |            |            |            |            |
| CYTH1B_N1379_B  | -----      | -----      | -----      | -----      | -----      |
| [94]            |            |            |            |            |            |
| CYTH2A_N1378_A  | -----      | -----      | -----      | -----      | -----      |
| [94]            |            |            |            |            |            |
| CYTH3A_N1051_A  | -----      | -----      | -----      | -----      | -----      |
| [93]            |            |            |            |            |            |
| CYTH3B_N1051_B  | -----      | -----      | -----      | -----      | -----      |
| [92]            |            |            |            |            |            |
| ROS1A_C811#1    | -----      | -----      | -----      | -----      | -----      |
| [94]            |            |            |            |            |            |
| ROS1B_C811#2    | -----      | -----      | -----      | -----      | -----      |
| [92]            |            |            |            |            |            |
| ROS2A_C544_A    | -----      | -----      | -----      | -----      | -----      |
| [94]            |            |            |            |            |            |
| ROS2B_C544_B    | -----      | -----      | -----      | -----      | -----      |
| [94]            |            |            |            |            |            |
| ROS3A_C1652_A   | -----      | -----      | -----      | -----      | -----      |
| [92]            |            |            |            |            |            |
| ROS3B_C1652_B   | -----      | -----      | -----      | -----      | -----      |
| [94]            |            |            |            |            |            |
| ROS4A_C841_A    | CTTATTATTC | TTTCCATACA | ACGTGACATT | GGCCATATAT | CAAGAATTCA |
| [144]           |            |            |            |            |            |
| ROS4B_C841_B    | -----      | -----      | -----      | -----      | -----      |
| [93]            |            |            |            |            |            |
| MELCO2A_C422_A  | -----      | -----      | -----      | -----      | -----      |
| [94]            |            |            |            |            |            |
| MELCO2B_C422_B  | -----      | -----      | -----      | -----      | -----      |
| [94]            |            |            |            |            |            |
| MELCO3A_C11_A   | -----      | -----      | -----      | -----      | -----      |
| [94]            |            |            |            |            |            |
| MELTT1A_TT03_A  | -----      | -----      | -----      | -----      | -----      |
| [91]            |            |            |            |            |            |
| MELTT1B_TT03_B  | -----      | -----      | -----      | -----      | -----      |
| [91]            |            |            |            |            |            |
| MELTT2A_TT04_A  | -----      | -----      | -----      | -----      | -----      |
| [91]            |            |            |            |            |            |
| MELTT2B_TT04_B  | -----      | -----      | -----      | -----      | -----      |
| [91]            |            |            |            |            |            |
| MELTT3A_TT14_A  | -----      | -----      | -----      | -----      | -----      |
| [91]            |            |            |            |            |            |
| MELTT3B_TT14_B  | -----      | -----      | -----      | -----      | -----      |
| [91]            |            |            |            |            |            |
| MELFG1A_C436_A  | -----      | -----      | -----      | -----      | -----      |
| [91]            |            |            |            |            |            |
| MELFG1B_C436_B  | -----      | -----      | -----      | -----      | -----      |
| [91]            |            |            |            |            |            |
| MELFG2A_C437_A  | -----      | -----      | -----      | -----      | -----      |
| [91]            |            |            |            |            |            |
| MELFG3A_C528_A  | -----      | -----      | -----      | -----      | -----      |
| [91]            |            |            |            |            |            |
| MELFG3B_C528_B  | -----      | -----      | -----      | -----      | -----      |
| [91]            |            |            |            |            |            |
| MELFG4A_C1384_A | -----      | -----      | -----      | -----      | -----      |
| [91]            |            |            |            |            |            |
| MELFG4B_C1384_B | -----      | -----      | -----      | -----      | -----      |
| [91]            |            |            |            |            |            |
| THEL4A_FG118_A  | -----      | -----      | -----      | -----      | -----      |
| [91]            |            |            |            |            |            |
| THEL4B_FG118_B  | -----      | -----      | -----      | -----      | -----      |
| [91]            |            |            |            |            |            |
| THEL2A_FG90_A   | -----      | -----      | -----      | -----      | -----      |
| [91]            |            |            |            |            |            |
| THEL2B_FG90_B   | -----      | -----      | -----      | -----      | -----      |
| [91]            |            |            |            |            |            |
| THEL3A_FG104_A  | -----      | -----      | -----      | -----      | -----      |
| [91]            |            |            |            |            |            |
| THEL3B_FG104_B  | -----      | -----      | -----      | -----      | -----      |
| [91]            |            |            |            |            |            |
| MAL1A_N4026_A   | -----      | -----      | -----      | -----      | -----      |
| [91]            |            |            |            |            |            |

```

MAL1B_N4026_B -----
[91]
MAL2A_N4027_A -----
[91]
MAL2B_N4027_B -----
[91]
ECUA1A_C428_A -----
[91]
ECUA2A_C2417_A -----
[91]
ECUA2B_C2417_B -----
[91]
AMAR1A_JM1916_A -----
[91]
AMAR2A_JM1917_A -----
[91]
AMAR3A_JM1271_A -----
[91]
AGLA2A_JM1174_A -----
[91]
AGLA2B_JM1174_B -----
[91]
AGLA3A_JM1178_A -----
[91]
PLES2A_C2397_A -----
[91]
PLES3A_C2429_A -----
[91]
PLES3B_C2429_B -----
[94]
CYDNO1A__553_A -----
[94]
CYDNO2A_570_A CTTATTATTC TTTCCATACA ACGTGACATT GGCCAAATAT CAAGAATTCA
[144]
CYDNO4A_N1047_A -----
[91]
CYDNO5_STRIB809#2 -----
[92]
H.HECALE_Y5_A -----
[91]
H.HECALE_Y5_B -----
[91]

[ 160 170 180 190
200]
[ . . . . ]

CYTH1A_N1379_A ----- -GATATTCTT ATTTATAAAT AAGTACATAA CAATATGGCC
[133]
CYTH1B_N1379_B ----- -.....
[133]
CYTH2A_N1378_A ----- -.....
[133]
CYTH3A_N1051_A ----- -.....T.....T.
[132]
CYTH3B_N1051_B ----- -.....C.....
[131]
ROS1A_C811#1 ----- -.....
[133]
ROS1B_C811#2 ----- -.....C.....
[131]
ROS2A_C544_A ----- -.....
[133]
ROS2B_C544_B ----- -.....
[133]
ROS3A_C1652_A ----- -.....C.....
[131]
ROS3B_C1652_B ----- -.....
[133]
ROS4A_C841_A ATTCAATTCA A......G.....C.....
[194]

```

|                 |       |                     |
|-----------------|-------|---------------------|
| ROS4B_C841_B    | ----- | .....T.....         |
| [132]           |       |                     |
| MELCO2A_C422_A  | ----- | .....               |
| [133]           |       |                     |
| MELCO2B_C422_B  | ----- | .....               |
| [133]           |       |                     |
| MELCO3A_C11_A   | ----- | .....               |
| [133]           |       |                     |
| MELTT1A_TT03_A  | ----- | .....G.C.....       |
| [130]           |       |                     |
| MELTT1B_TT03_B  | ----- | .....C.....         |
| [130]           |       |                     |
| MELTT2A_TT04_A  | ----- | .....G.C.....       |
| [130]           |       |                     |
| MELTT2B_TT04_B  | ----- | .....C.....         |
| [130]           |       |                     |
| MELTT3A_TT14_A  | ----- | .....G.C.....       |
| [130]           |       |                     |
| MELTT3B_TT14_B  | ----- | .....G.C.....       |
| [130]           |       |                     |
| MELFG1A_C436_A  | ----- | .....C.....         |
| [130]           |       |                     |
| MELFG1B_C436_B  | ----- | .....C.....         |
| [130]           |       |                     |
| MELFG2A_C437_A  | ----- | .....C.....         |
| [130]           |       |                     |
| MELFG3A_C528_A  | ----- | .....C.....         |
| [130]           |       |                     |
| MELFG3B_C528_B  | ----- | .....C.....         |
| [130]           |       |                     |
| MELFG4A_C1384_A | ----- | .....G.C.....G..... |
| [130]           |       |                     |
| MELFG4B_C1384_B | ----- | .....C.....         |
| [130]           |       |                     |
| THEL4A_FG118_A  | ----- | .....G.C.....       |
| [130]           |       |                     |
| THEL4B_FG118_B  | ----- | .....C.....         |
| [130]           |       |                     |
| THEL2A_FG90_A   | ----- | .....G.C.....G..... |
| [130]           |       |                     |
| THEL2B_FG90_B   | ----- | .....C.....         |
| [130]           |       |                     |
| THEL3A_FG104_A  | ----- | .....G.C.....       |
| [130]           |       |                     |
| THEL3B_FG104_B  | ----- | .....G.C.....       |
| [130]           |       |                     |
| MAL1A_N4026_A   | ----- | .....C.....         |
| [130]           |       |                     |
| MAL1B_N4026_B   | ----- | .....C.....         |
| [130]           |       |                     |
| MAL2A_N4027_A   | ----- | .....C.....         |
| [130]           |       |                     |
| MAL2B_N4027_B   | ----- | .....C.....         |
| [130]           |       |                     |
| ECUA1A_C428_A   | ----- | .....C.....         |
| [130]           |       |                     |
| ECUA2A_C2417_A  | ----- | .....C.....         |
| [130]           |       |                     |
| ECUA2B_C2417_B  | ----- | .....C.....         |
| [130]           |       |                     |
| AMAR1A_JM1916_A | ----- | .....C.....         |
| [130]           |       |                     |
| AMAR2A_JM1917_A | ----- | .....C.....         |
| [130]           |       |                     |
| AMAR3A_JM1271_A | ----- | .....C.....         |
| [130]           |       |                     |
| AGLA2A_JM1174_A | ----- | .....C.....         |
| [130]           |       |                     |
| AGLA2B_JM1174_B | ----- | .....C.....         |
| [130]           |       |                     |
| AGLA3A_JM1178_A | ----- | .....G.C.....       |
| [130]           |       |                     |

```

PLES2A_C2397_A ----- .....C .....
[130]
PLES3A_C2429_A ----- .....C .....
[130]
PLES3B_C2429_B ----- .....C .....
[133]
CYDNO1A_553_A ----- .....
[133]
CYDNO2A_570_A ATTCAATTCA A..... .G.....C .....
[194]
CYDNO4A_N1047_A ----- .....C .....T.
[130]
CYDNO5_STRIB809#2 ----- .....C .....
[131]
H.HECALE_Y5_A ----- .....C .....
[130]
H.HECALE_Y5_B ----- .....C .....
[130]

[                210          220          230          240
250]
[                .                .                .                .                .]

CYTH1A_N1379_A ATAATCTGAT AAGACTAATT CTATCAATAA TAGGACTATT ATGAATCATA
[183]
CYTH1B_N1379_B .....
[183]
CYTH2A_N1378_A .C.....
[183]
CYTH3A_N1051_A .....
[180]
CYTH3B_N1051_B .....A.. .....G.....G .....T.G
[181]
ROS1A_C811#1 C.....
[183]
ROS1B_C811#2 .....A.. .....G.....G .....T.G
[181]
ROS2A_C544_A .....
[183]
ROS2B_C544_B .....
[183]
ROS3A_C1652_A .....A.. .....G.....G .....T.G
[181]
ROS3B_C1652_B .....
[183]
ROS4A_C841_A .....T..
[244]
ROS4B_C841_B .....
[182]
MELCO2A_C422_A .....
[183]
MELCO2B_C422_B .....
[183]
MELCO3A_C11_A .....
[183]
MELTT1A_TT03_A ...T.....
[180]
MELTT1B_TT03_B .....A.....T
[180]
MELTT2A_TT04_A ...T.....
[180]
MELTT2B_TT04_B .....A.....T
[180]
MELTT3A_TT14_A ...T.....
[180]
MELTT3B_TT14_B ...T.....G.....
[180]
MELFG1A_C436_A .....A.....T
[180]
MELFG1B_C436_B .....A.....T
[180]

```

MELFG2A\_C437\_A .....A.....T  
[180]  
MELFG3A\_C528\_A .....A.....T  
[180]  
MELFG3B\_C528\_B .....A.....---T  
[177]  
MELFG4A\_C1384\_A ...T.....  
[180]  
MELFG4B\_C1384\_B .....A.....T  
[180]  
THEL4A\_FG118\_A ...T.....  
[180]  
THEL4B\_FG118\_B .....A.....T  
[180]  
THEL2A\_FG90\_A ...T.....  
[180]  
THEL2B\_FG90\_B .....A.....T  
[180]  
THEL3A\_FG104\_A ...T.....  
[180]  
THEL3B\_FG104\_B ...T.....-  
[179]  
MAL1A\_N4026\_A ...T.....  
[180]  
MAL1B\_N4026\_B ...T.....--  
[178]  
MAL2A\_N4027\_A ...T.....  
[180]  
MAL2B\_N4027\_B ...T.....  
[180]  
ECUA1A\_C428\_A ...T.....  
[180]  
ECUA2A\_C2417\_A ...T.....  
[180]  
ECUA2B\_C2417\_B ...T.....  
[180]  
AMAR1A\_JM1916\_A ...T.....  
[180]  
AMAR2A\_JM1917\_A ...T.....  
[180]  
AMAR3A\_JM1271\_A ...T.....  
[180]  
AGLA2A\_JM1174\_A ...T.....  
[180]  
AGLA2B\_JM1174\_B ...T.....  
[180]  
AGLA3A\_JM1178\_A ...T.....  
[180]  
PLES2A\_C2397\_A ...T.....  
[180]  
PLES3A\_C2429\_A ...T.....  
[180]  
PLES3B\_C2429\_B .....  
[183]  
CYDNO1A\_\_553\_A .....  
[183]  
CYDNO2A\_570\_A .....T.....  
[244]  
CYDNO4A\_N1047\_A .....  
[180]  
CYDNO5\_STRIB809#2 .....A.....G.....G.....T.G  
[181]  
H.HECALE\_Y5\_A .....  
[180]  
H.HECALE\_Y5\_B .....  
[180]

[ 260 270 280 290  
300 ]

|                          |             |            |            |            |             |
|--------------------------|-------------|------------|------------|------------|-------------|
| CYTH1A_N1379_A<br>[233]  | ACAAATCTTT  | CAACTAATTA | AATGTAAATT | CATGTTTTAA | ATAATTA AAA |
| CYTH1B_N1379_B<br>[233]  | .....       | T.....     | .....      | .....      | .....       |
| CYTH2A_N1378_A<br>[233]  | ...T.....   | T.....     | .....      | .....      | .....       |
| CYTH3A_N1051_A<br>[230]  | .....       | T.....     | .....      | .....      | .....       |
| CYTH3B_N1051_B<br>[231]  | .....G..... | T.....     | .....      | .....T.    | .A..AAT..T  |
| ROS1A_C811#1<br>[233]    | .....       | T.....     | .....      | .....      | .....       |
| ROS1B_C811#2<br>[231]    | .....G..... | T.....     | .....      | .....      | .A..AAT.TT  |
| ROS2A_C544_A<br>[233]    | .....       | T.....     | .....      | .....      | .....       |
| ROS2B_C544_B<br>[233]    | .....       | T.....     | .....      | .....      | .....       |
| ROS3A_C1652_A<br>[231]   | .....G..... | T.....     | .....      | .....      | .A..AAT.TT  |
| ROS3B_C1652_B<br>[233]   | .....       | T.....     | .....      | .....      | .....       |
| ROS4A_C841_A<br>[294]    | .....       | G.....     | .....      | .....      | .....       |
| ROS4B_C841_B<br>[232]    | .....       | T.....     | .....      | .....      | .....       |
| MELCO2A_C422_A<br>[233]  | .....       | T.....     | .....      | .....      | .....       |
| MELCO2B_C422_B<br>[233]  | .....       | T.....     | .....      | .....      | .....       |
| MELCO3A_C11_A<br>[233]   | .....       | T.....     | .....      | .....      | .....       |
| MELTT1A_TT03_A<br>[230]  | .....       | T.....     | .....      | .....      | .....       |
| MELTT1B_TT03_B<br>[230]  | .....       | T.....     | .....      | .....      | .....       |
| MELTT2A_TT04_A<br>[230]  | .....       | T.....     | .....      | .....      | .....       |
| MELTT2B_TT04_B<br>[230]  | .....       | T.....     | .....      | .....      | .....       |
| MELTT3A_TT14_A<br>[230]  | .....       | T.....     | .....      | .....      | .....       |
| MELTT3B_TT14_B<br>[230]  | .....       | T.....     | .....      | .....      | .....       |
| MELFG1A_C436_A<br>[230]  | .....       | T.....     | .....      | .....      | .....       |
| MELFG1B_C436_B<br>[230]  | .....       | T.....     | .....      | .....      | .....       |
| MELFG2A_C437_A<br>[230]  | .....       | T.....     | .....      | .....      | .....       |
| MELFG3A_C528_A<br>[230]  | .....       | T.....     | .....      | .....      | .....       |
| MELFG3B_C528_B<br>[227]  | .....       | T.....     | .....      | .....      | .....       |
| MELFG4A_C1384_A<br>[230] | .....       | T.....     | .....      | .....      | .....       |
| MELFG4B_C1384_B<br>[230] | .....       | T.....     | .....      | .....      | .....       |
| THEL4A_FG118_A<br>[230]  | .....       | T.....     | .....      | .....      | .....       |
| THEL4B_FG118_B<br>[230]  | .....       | T.....     | .....      | .....      | .....       |
| THEL2A_FG90_A<br>[230]   | .....       | T.....     | .....      | .....      | .....       |
| THEL2B_FG90_B<br>[230]   | .....       | T.....     | .....      | .....      | .....       |
| THEL3A_FG104_A<br>[230]  | .....       | T.....     | .....      | .....      | .....       |
| THEL3B_FG104_B<br>[229]  | .....       | T.....     | .....      | .....      | .....       |
| MAL1A_N4026_A<br>[230]   | .....       | T.....     | .....      | .....      | .....       |

```

MAL1B_N4026_B ..... T.....
[228]
MAL2A_N4027_A ..... T.....
[230]
MAL2B_N4027_B ..... T.....
[230]
ECUA1A_C428_A ..... T.....
[230]
ECUA2A_C2417_A ..... T.....
[230]
ECUA2B_C2417_B ..... T.....
[230]
AMAR1A_JM1916_A ..... T.....
[230]
AMAR2A_JM1917_A ..... T.....
[230]
AMAR3A_JM1271_A ..... T.....
[230]
AGLA2A_JM1174_A ..... T.....
[230]
AGLA2B_JM1174_B ..... T.....
[230]
AGLA3A_JM1178_A ..... T.....
[230]
PLES2A_C2397_A ..... T.....
[230]
PLES3A_C2429_A ..... T.....
[230]
PLES3B_C2429_B ..... T..... A.....
[233]
CYDNO1A_553_A ..... T.....
[233]
CYDNO2A_570_A ..... G.....
[294]
CYDNO4A_N1047_A ..... T..... A.....
[230]
CYDNO5_STRIB809#2 ..... G..... T..... ..... A...AAT.TT
[231]
H.HECALE_Y5_A ..... C.. T.G.....
[230]
H.HECALE_Y5_B ..... C.. T.....
[230]

```

```

[ 310 320 330 340
350]
[ . . . . ]

```

```

CYTH1A_N1379_A ATTTAATT-T GTATATGAGG GAGAGTTGTT ATTAC-ACAC A---TCTCTA
[278]
CYTH1B_N1379_B .....- .....- .....- .....-
[278]
CYTH2A_N1378_A .....- .....- .....- .....-
[278]
CYTH3A_N1051_A .....- .....- .....- .....-
[275]
CYTH3B_N1051_B T.....A. A....G.-- .....TT....ATA.....
[279]
ROS1A_C811#1 .....- .....- .....- .....-
[278]
ROS1B_C811#2 T.....A. A....G.-- .....TT..G.ATA.....
[278]
ROS2A_C544_A .....- .....- .....- .....-
[278]
ROS2B_C544_B .AA.....- .....A.....- .....-
[278]
ROS3A_C1652_A T.....A. A....G.-- .....TT....ATA.....
[279]
ROS3B_C1652_B .....- .....- .....- .....-
[278]
ROS4A_C841_A .....- .....A.....- .....-ACAG.....
[339]

```

|                 |         |         |        |           |
|-----------------|---------|---------|--------|-----------|
| ROS4B_C841_B    | .....-  | .....   | .....  | ----      |
| [277]           |         |         |        |           |
| MELCO2A_C422_A  | .....-- | .....   | .....  | ----      |
| [277]           |         |         |        |           |
| MELCO2B_C422_B  | .....-  | .....   | .....  | ----      |
| [278]           |         |         |        |           |
| MELCO3A_C11_A   | .....-  | .....   | .....  | ----      |
| [278]           |         |         |        |           |
| MELTT1A_TT03_A  | .....-  | .....-- | .....  | .ACA..... |
| [276]           |         |         |        |           |
| MELTT1B_TT03_B  | .....-  | .T..... | A..... | .....     |
| [278]           |         |         |        |           |
| MELTT2A_TT04_A  | .....-  | .....-- | .....  | .ACA..... |
| [276]           |         |         |        |           |
| MELTT2B_TT04_B  | .....-  | .T..... | A..... | .....     |
| [278]           |         |         |        |           |
| MELTT3A_TT14_A  | .....-  | .....-- | .....  | .ACA..... |
| [276]           |         |         |        |           |
| MELTT3B_TT14_B  | .....-  | .....-- | .....  | .ACA..... |
| [276]           |         |         |        |           |
| MELFG1A_C436_A  | .....-  | .....   | A..... | .....     |
| [278]           |         |         |        |           |
| MELFG1B_C436_B  | .....-  | .....   | A..... | .....     |
| [278]           |         |         |        |           |
| MELFG2A_C437_A  | .....-  | .T..... | A..... | .....     |
| [278]           |         |         |        |           |
| MELFG3A_C528_A  | .....-  | .T..... | A..... | .....     |
| [278]           |         |         |        |           |
| MELFG3B_C528_B  | .....-  | .....   | A..... | .....     |
| [275]           |         |         |        |           |
| MELFG4A_C1384_A | .....-  | .....-- | .....  | .ATA..... |
| [276]           |         |         |        |           |
| MELFG4B_C1384_B | .....-  | .T..... | A..... | .....     |
| [278]           |         |         |        |           |
| THEL4A_FG118_A  | .....-  | .....-- | .....  | .ACA..... |
| [276]           |         |         |        |           |
| THEL4B_FG118_B  | .....-  | .T..... | A..... | .....     |
| [278]           |         |         |        |           |
| THEL2A_FG90_A   | .....-  | .....-- | .....  | .ATA..... |
| [276]           |         |         |        |           |
| THEL2B_FG90_B   | .....-  | .....   | A..... | .....     |
| [278]           |         |         |        |           |
| THEL3A_FG104_A  | .....-  | .....-- | .....  | .ACA..... |
| [276]           |         |         |        |           |
| THEL3B_FG104_B  | .....-  | .....-- | .....  | .ACA..... |
| [275]           |         |         |        |           |
| MAL1A_N4026_A   | .....-  | .....-- | .....  | .ACA..... |
| [276]           |         |         |        |           |
| MAL1B_N4026_B   | .....-  | .....-- | .....  | .ACA..... |
| [274]           |         |         |        |           |
| MAL2A_N4027_A   | .....-  | .....-- | .....  | .ACA..... |
| [274]           |         |         |        |           |
| MAL2B_N4027_B   | .....-  | .....-- | .....  | .ACA..... |
| [276]           |         |         |        |           |
| ECUA1A_C428_A   | .....-  | .....-- | .....  | .ACA..... |
| [276]           |         |         |        |           |
| ECUA2A_C2417_A  | .....-  | .....-- | .....  | .ACA..... |
| [276]           |         |         |        |           |
| ECUA2B_C2417_B  | .....-  | .....-- | .....  | .ACA..... |
| [276]           |         |         |        |           |
| AMAR1A_JM1916_A | .....-  | .....-- | .....  | .ACA..... |
| [276]           |         |         |        |           |
| AMAR2A_JM1917_A | .....-  | .....-- | .....  | .ACA..... |
| [276]           |         |         |        |           |
| AMAR3A_JM1271_A | .....-  | .....-- | .....  | .ACA..... |
| [276]           |         |         |        |           |
| AGLA2A_JM1174_A | .....-  | .....-- | .....  | .ACA..... |
| [276]           |         |         |        |           |
| AGLA2B_JM1174_B | .....-  | .....-- | .....  | .ACA..... |
| [276]           |         |         |        |           |
| AGLA3A_JM1178_A | .....-  | .....-- | .....  | .ACA..... |
| [276]           |         |         |        |           |



```

PLES2A_C2397_A      .....- . . . . .-- . . . . .- . . . . . .ACA.....
[276]
PLES3A_C2429_A     .....- . . . . .-- . . . . . T. . . . .- . . . . . .ACA.....
[276]
PLES3B_C2429_B     .....- . . . . . A . . . . . A. . . . .- . . . . . .ACA.....
[281]
CYDNO1A_553_A      .....- . . . . .- . . . . .- . . . . .- . . . . . .---.....
[278]
CYDNO2A_570_A      .....- . . . . . A . . . . . . CACA-CA. . . . .- . . . . . .---G.....
[339]
CYDNO4A_N1047_A    .....- . . . . . A . . . . .- . . . . .- . . . . . .ACA.....
[278]
CYDNO5_STRIB809#2  T. . . . . A. A. . . . G. . . . .-- . . . . . TT. . . . . .ATA.....
[279]
H.HECALE_Y5_A      .....- . . . . . A . . . . .- . . . . .- . . . . . .ACA.....
[275]
H.HECALE_Y5_B      .....- . . . . . A . . . . .- . . . . .- . . . . . G. .ACA.....
[275]

```

```

[                               360           370           380           390
400]
[                               .               .               .               .               .]

```

```

CYTH1A_N1379_A     CAGTTTGCTA AATTTTTTTTG ATAAATGG-- -----
[306]
CYTH1B_N1379_B     .....- . . . . .- . . . . .- . . . . .- . . . . .-----
[306]
CYTH2A_N1378_A     .....- . . . . .- . . . . .- . . . . .- . . . . .-----
[306]
CYTH3A_N1051_A     .....- . . . . .- . . . . .- . . . . .- . . . . .-----
[303]
CYTH3B_N1051_B     .....A. . . . . . . . . . . C. .A.-- -----
[307]
ROS1A_C811#1       .....- . . . . .- . . . . .- . . . . .- . . . . .-----
[306]
ROS1B_C811#2       .....A. . . . . . . . . . . C. .A.-- -----
[306]
ROS2A_C544_A       .....- . . . . .- . . . . .- . . . . .- . . . . .-----
[306]
ROS2B_C544_B       .....- . . . . . T. . . . .- . . . . .- . . . . .-----
[306]
ROS3A_C1652_A      .....A. . . . . . . . . . . C. .A.-- -----
[307]
ROS3B_C1652_B      .....- . . . . .- . . . . .- . . . . .- . . . . .-----
[306]
ROS4A_C841_A       .....- . . . . .- . . . . .- . . . . .- . . . . .-----
[367]
ROS4B_C841_B       .....- . . . . .- . . . . .- . . . . .- . . . . .-----
[295]
MELCO2A_C422_A     .....- . . . . .- . . . . .- . . . . .- . . . . .-----
[305]
MELCO2B_C422_B     .....- . . . . .- . . . . .- . . . . .- . . . . .-----
[306]
MELCO3A_C11_A      .....- . . . . .- . . . . .- . . . . .- . . . . .-----
[306]
MELTT1A_TT03_A     .....A. .A. . . . . . . . . . . C. .A.-- -----
[304]
MELTT1B_TT03_B     .....- . . . . . A. . . . .- . . . . . C. .A.-- -----
[305]
MELTT2A_TT04_A     .....A. .A. . . . . . . . . . . C. .A.-- -----
[304]
MELTT2B_TT04_B     .....- . . . . . A. . . . .- . . . . . C. .A.-- -----
[305]
MELTT3A_TT14_A     .....A. .A. . . . . . . . . . . C. .A.-- -----
[304]
MELTT3B_TT14_B     .....A. .A. . . . . . . . . . . C. .A.-- -----
[304]
MELFG1A_C436_A     .....- . . . . . A. . . . .- . . . . . C. .A.-- -----
[305]
MELFG1B_C436_B     .....- . . . . . A. . . . .- . . . . . C. .A.-- -----
[305]

```

```

MELFG2A_C437_A .....A.....-...C.A.-- -----
[305]
MELFG3A_C528_A .....A.....-...C.A.-- -----
[305]
MELFG3B_C528_B .....A.....-...C.A.-- -----
[302]
MELFG4A_C1384_A .....A..A.....-...C.A.-- -----
[304]
MELFG4B_C1384_B ...C.....A.....-...C.A.-- -----
[305]
THEL4A_FG118_A .....A..A.....-...C.A.-- -----
[304]
THEL4B_FG118_B .....A.....-...C.A.-- -----
[305]
THEL2A_FG90_A .....A..A.....-...C.A.-- -----
[304]
THEL2B_FG90_B .....A...C.-...C.A.-- -----
[305]
THEL3A_FG104_A .....A..A.....-...C.A.-- -----
[304]
THEL3B_FG104_B .....A..A.....-...C.A.-- -----
[303]
MAL1A_N4026_A .....A..A.....-...C.A.-- -----
[304]
MAL1B_N4026_B .....A.....-...C.A.-- -----
[302]
MAL2A_N4027_A .....A..A.....-...C.A.-- -----
[302]
MAL2B_N4027_B .....A..A.....-...C.A.-- -----
[304]
ECUA1A_C428_A .....A..A.....-...C.A.-- -----
[304]
ECUA2A_C2417_A .....A.....-...C.A.TA CTGTGTA ACTACTAT
[325]
ECUA2B_C2417_B .....A..A.....-...C.A.-- -----
[304]
AMAR1A_JM1916_A .....A..A.....-...C.A.-- -----
[304]
AMAR2A_JM1917_A .....A..A.....-...C.A.-- -----
[304]
AMAR3A_JM1271_A .....A..A.....-...C.A.-- -----
[304]
AGLA2A_JM1174_A .....A..A.....-...C.A.-- -----
[304]
AGLA2B_JM1174_B .....A..A.....A.C.A.-- -----
[304]
AGLA3A_JM1178_A .....A..A.....-...C.A.-- -----
[304]
PLES2A_C2397_A .....A..A.....-...C.A.-- -----
[304]
PLES3A_C2429_A .....A..A.....-...C.A.-- -----
[304]
PLES3B_C2429_B .....T.....-...C.A.-- -----
[309]
CYDNO1A_553_A .....A.....-...C.A.-- -----
[306]
CYDNO2A_570_A .....A.....-...C.A.-- -----
[367]
CYDNO4A_N1047_A .....A.....-...C.A.-- -----
[306]
CYDNO5_STRIB809#2 .....A.....-...C.A.-- -----
[307]
H.HECALE_Y5_A T.....A.....-...C.A.-- -----
[303]
H.HECALE_Y5_B T.....A.....-...C.A.-- -----
[303]

```

```

[ 410 420 430 440
450]
[ . . . . . ]

```

|                          |       |            |            |           |            |
|--------------------------|-------|------------|------------|-----------|------------|
| CYTH1A_N1379_A<br>[346]  | ----- | AATACTAAGT | ACTTTCTTCT | CTTCCACAA | AAACTAAATT |
| CYTH1B_N1379_B<br>[346]  | ----- | .....      | .....      | .....     | .....      |
| CYTH2A_N1378_A<br>[346]  | ----- | .....      | .....      | .....     | .....      |
| CYTH3A_N1051_A<br>[343]  | ----- | .....      | .....      | .....     | .....      |
| CYTH3B_N1051_B<br>[347]  | ----- | .....      | .....      | .....     | TT.....    |
| ROS1A_C811#1<br>[346]    | ----- | .....      | .....      | .....     | .....      |
| ROS1B_C811#2<br>[346]    | ----- | .....      | .....      | .....     | TT.....    |
| ROS2A_C544_A<br>[346]    | ----- | .....      | .....      | .....     | .....      |
| ROS2B_C544_B<br>[346]    | ----- | .....      | .....      | .....     | .....      |
| ROS3A_C1652_A<br>[347]   | ----- | .....      | .....      | .....     | TT.....    |
| ROS3B_C1652_B<br>[333]   | ----- | .....A.    | -----      | -----     | .....      |
| ROS4A_C841_A<br>[407]    | ----- | .....      | .....      | .....     | T.....     |
| ROS4B_C841_B<br>[332]    | ----- | -----      | -----      | -----     | .....      |
| MELCO2A_C422_A<br>[345]  | ----- | .....      | .....      | .....     | .....      |
| MELCO2B_C422_B<br>[346]  | ----- | .....      | .....      | .....     | .....      |
| MELCO3A_C11_A<br>[346]   | ----- | .....      | .....      | .....     | .....      |
| MELTT1A_TT03_A<br>[344]  | ----- | .....      | .....      | CT.....   | T.....     |
| MELTT1B_TT03_B<br>[345]  | ----- | .....      | T...G..... | .....     | T.....     |
| MELTT2A_TT04_A<br>[344]  | ----- | .....      | .....      | CT.....   | T.....     |
| MELTT2B_TT04_B<br>[345]  | ----- | .....      | T...G..... | .....     | T.....     |
| MELTT3A_TT14_A<br>[344]  | ----- | .....      | .....      | CT.....   | T.....     |
| MELTT3B_TT14_B<br>[344]  | ----- | .....      | .....      | CT.....   | T.....     |
| MELFG1A_C436_A<br>[345]  | ----- | .....      | T...A..... | .....     | T.....     |
| MELFG1B_C436_B<br>[345]  | ----- | .....      | T...G..... | .....     | T.....     |
| MELFG2A_C437_A<br>[345]  | ----- | .....      | T...G..... | .....     | T.....     |
| MELFG3A_C528_A<br>[345]  | ----- | .....      | T...G..... | .....     | T.....T..  |
| MELFG3B_C528_B<br>[342]  | ----- | .....      | T...G..... | .....     | T.....     |
| MELFG4A_C1384_A<br>[344] | ----- | .....      | .....      | CT.....   | T.....     |
| MELFG4B_C1384_B<br>[345] | ----- | .....      | T...G..... | .....     | T.....     |
| THEL4A_FG118_A<br>[344]  | ----- | .....      | .....      | CT.....   | T.....     |
| THEL4B_FG118_B<br>[345]  | ----- | .....      | T...G..... | .....     | T.....     |
| THEL2A_FG90_A<br>[344]   | ----- | .....      | .....      | CT.....   | T.....     |
| THEL2B_FG90_B<br>[345]   | ----- | .....      | T...G..... | .....     | T.....     |
| THEL3A_FG104_A<br>[344]  | ----- | .....      | .....      | CT.....   | T.....     |
| THEL3B_FG104_B<br>[343]  | ----- | .....      | .....      | CT.....   | T.....     |
| MAL1A_N4026_A<br>[344]   | ----- | .....      | .....      | CT.....   | T.....     |

|                   |            |       |       |         |         |
|-------------------|------------|-------|-------|---------|---------|
| MAL1B_N4026_B     | -----      | ..... | ..... | CT..... | T.....  |
| [342]             |            |       |       |         |         |
| MAL2A_N4027_A     | -----      | ..... | ..... | CT..... | T.....  |
| [342]             |            |       |       |         |         |
| MAL2B_N4027_B     | -----      | ..... | ..... | CT..... | T.....  |
| [344]             |            |       |       |         |         |
| ECUA1A_C428_A     | -----      | ..... | ..... | CT..... | T.....  |
| [344]             |            |       |       |         |         |
| ECUA2A_C2417_A    | AGTAGTTAGT | ..... | ..... | CT..... | T.....  |
| [375]             |            |       |       |         |         |
| ECUA2B_C2417_B    | -----      | ..... | ..... | CT..... | T.....  |
| [344]             |            |       |       |         |         |
| AMAR1A_JM1916_A   | -----      | ..... | ..... | CT..... | T.....  |
| [344]             |            |       |       |         |         |
| AMAR2A_JM1917_A   | -----      | ..... | ..... | CT..... | T.....  |
| [344]             |            |       |       |         |         |
| AMAR3A_JM1271_A   | -----      | ..... | ..... | CT..... | T.....  |
| [344]             |            |       |       |         |         |
| AGLA2A_JM1174_A   | -----      | ..... | ..... | CT..... | T.....  |
| [344]             |            |       |       |         |         |
| AGLA2B_JM1174_B   | -----      | ..... | ..... | CT..... | T.....  |
| [344]             |            |       |       |         |         |
| AGLA3A_JM1178_A   | -----      | ..... | ..... | CT..... | T.....  |
| [344]             |            |       |       |         |         |
| PLES2A_C2397_A    | -----      | ..... | ..... | CT..... | T.....  |
| [344]             |            |       |       |         |         |
| PLES3A_C2429_A    | -----      | ..... | ..... | CT..... | T.....  |
| [344]             |            |       |       |         |         |
| PLES3B_C2429_B    | -----      | ..... | ..... |         | T.....  |
| [349]             |            |       |       |         |         |
| CYDNO1A_553_A     | -----      | ..... | ..... |         |         |
| [346]             |            |       |       |         |         |
| CYDNO2A_570_A     | -----      | ..... | ..... |         |         |
| [407]             |            |       |       |         |         |
| CYDNO4A_N1047_A   | -----      | ..... | ..... |         | T.....  |
| [346]             |            |       |       |         |         |
| CYDNO5_STRIB809#2 | -----      | ..... | ..... |         | TT..... |
| [347]             |            |       |       |         |         |
| H.HECALE_Y5_A     | -----      | ..... | ..... | C.....  | G.....  |
| [343]             |            |       |       |         | T.....  |
| H.HECALE_Y5_B     | -----      | ..... | ..... | C.....  | G.....  |
| [343]             |            |       |       |         | T.....  |

[ 460 470 480 490 ] ]

|                |            |            |            |            |          |
|----------------|------------|------------|------------|------------|----------|
| CYTH1A_N1379_A | TTATTTCAGG | ACCATGCAGA | ACAACTTCAT | AAGAGCTTTC | CGAACATG |
| [394]          |            |            |            |            |          |
| CYTH1B_N1379_B | .....      | .....      | .....      | .....      | .....    |
| [394]          |            |            |            |            |          |
| CYTH2A_N1378_A | .....      | .....      | .....      | .....      | .....    |
| [394]          |            |            |            |            |          |
| CYTH3A_N1051_A | .....      | .....      | .....      | .....      | .....    |
| [391]          |            |            |            |            |          |
| CYTH3B_N1051_B | .....      | AT.....    | .....      | .....      | TG.....  |
| [395]          |            |            |            |            |          |
| ROS1A_C811#1   | .....      | .....      | .....      | .....      | .....    |
| [394]          |            |            |            |            |          |
| ROS1B_C811#2   | .....      | AT.....    | .....      | .....      | TG.....  |
| [394]          |            |            |            |            |          |
| ROS2A_C544_A   | .....      | .....      | .....      | .....      | .....    |
| [394]          |            |            |            |            |          |
| ROS2B_C544_B   | .....      | .....      | .....      | .....      | .....    |
| [394]          |            |            |            |            |          |
| ROS3A_C1652_A  | .....      | AT.....    | .....      | G.....     | TG.....  |
| [395]          |            |            |            |            |          |
| ROS3B_C1652_B  | .....      | .....      | .....      | .....      | .....    |
| [381]          |            |            |            |            |          |
| ROS4A_C841_A   | .....      | .....      | .....      | .....      | TG.....  |
| [455]          |            |            |            |            |          |
| ROS4B_C841_B   | .....      | .....      | .....      | .....      | .....    |
| [380]          |            |            |            |            |          |

|                 |       |              |                |
|-----------------|-------|--------------|----------------|
| MELCO2A_C422_A  | ..... | .....        | .....          |
| [393]           |       |              |                |
| MELCO2B_C422_B  | ..... | .....        | .....          |
| [394]           |       |              |                |
| MELCO3A_C11_A   | ..... | .....        | .....          |
| [394]           |       |              |                |
| MELTT1A_TT03_A  | ..... | CA.....      | TG.....        |
| [392]           |       |              |                |
| MELTT1B_TT03_B  | ..... | A.....       | TG.....        |
| [393]           |       |              |                |
| MELTT2A_TT04_A  | ..... | CA.....      | TG.....        |
| [392]           |       |              |                |
| MELTT2B_TT04_B  | ..... | A.....       | TG.....        |
| [393]           |       |              |                |
| MELTT3A_TT14_A  | ..... | CA.....      | TG.....        |
| [392]           |       |              |                |
| MELTT3B_TT14_B  | ..... | CA.....      | TG.....        |
| [392]           |       |              |                |
| MELFG1A_C436_A  | ..... | A.....       | TG.....        |
| [393]           |       |              |                |
| MELFG1B_C436_B  | ..... | A.....       | TG.....        |
| [393]           |       |              |                |
| MELFG2A_C437_A  | ..... | A.....       | TG.....        |
| [393]           |       |              |                |
| MELFG3A_C528_A  | ..... | A.....       | TG.....        |
| [393]           |       |              |                |
| MELFG3B_C528_B  | ..... | A.....       | TG.....        |
| [390]           |       |              |                |
| MELFG4A_C1384_A | ..... | CA.....      | TG.....        |
| [392]           |       |              |                |
| MELFG4B_C1384_B | ..... | A.....       | TG.....        |
| [393]           |       |              |                |
| THEL4A_FG118_A  | ..... | CA.....      | TG.....        |
| [392]           |       |              |                |
| THEL4B_FG118_B  | ..... | A.....       | TG.....        |
| [393]           |       |              |                |
| THEL2A_FG90_A   | ..... | CA.....      | TG.....        |
| [392]           |       |              |                |
| THEL2B_FG90_B   | ..... | A.....       | TG.....        |
| [393]           |       |              |                |
| THEL3A_FG104_A  | ..... | CA.....      | TG.....        |
| [392]           |       |              |                |
| THEL3B_FG104_B  | ..... | CA.....      | TG.....        |
| [391]           |       |              |                |
| MAL1A_N4026_A   | ..... | CA.....      | TG.....        |
| [392]           |       |              |                |
| MAL1B_N4026_B   | ..... | A.....T..... | CA.....TG..... |
| [390]           |       |              |                |
| MAL2A_N4027_A   | ..... | CA.....      | TG.....        |
| [390]           |       |              |                |
| MAL2B_N4027_B   | ..... | CA.....      | TG.....        |
| [392]           |       |              |                |
| ECUA1A_C428_A   | ..... | CA.....      | TG.....        |
| [392]           |       |              |                |
| ECUA2A_C2417_A  | ..... | CA.....      | TG.....        |
| [423]           |       |              |                |
| ECUA2B_C2417_B  | ..... | CA.....      | TG.....        |
| [392]           |       |              |                |
| AMAR1A_JM1916_A | ..... | CA.....      | TG.....        |
| [392]           |       |              |                |
| AMAR2A_JM1917_A | ..... | CA.....      | TG.....        |
| [392]           |       |              |                |
| AMAR3A_JM1271_A | ..... | CA.....      | TG.....        |
| [392]           |       |              |                |
| AGLA2A_JM1174_A | ..... | CA.....      | TG.....        |
| [392]           |       |              |                |
| AGLA2B_JM1174_B | ..... | CA.....      | TG.....        |
| [392]           |       |              |                |
| AGLA3A_JM1178_A | ..... | CA.....      | TG.....        |
| [392]           |       |              |                |
| PLES2A_C2397_A  | ..... | CA.....      | TG.....        |
| [392]           |       |              |                |

```

PLES3A_C2429_A      .....CA.G.. .TG.....
[392]
PLES3B_C2429_B      .....A..... .TG.....
[397]
CYDNO1A_553_A       .....C.....C.....
[394]
CYDNO2A_570_A       .....
[455]
CYDNO4A_N1047_A     .....A..... .TG.....
[394]
CYDNO5_STRIB809#2   .....AT..... ????????? ?????????
[395]
H.HECALE_Y5_A       ..... .TG.....
[391]
H.HECALE_Y5_B       .....C..... .TG.....
[391]
;
END;

BEGIN paup;

exclude 38-40 289-310 317-325 342-344 359-369;
lset Base=(0.3472 0.1659 0.1163) Nst=6 Rmat=(1.0000 2.9083 1.0000 1.0000
1.6178) Rates=equal Pinvar=0.4172;
END;

```

### D. Alignment for *H. melpomene* at the *Tpi* locus

```

#NEXUS
[MacClade 4.0 registered to nmgg, nmgg]

BEGIN DATA;
  DIMENSIONS NTAX=50 NCHAR=623;
  FORMAT DATATYPE=DNA MISSING=? GAP=- MATCHCHAR=. INTERLEAVE ;
MATRIX

[          10          20          30          40          50]
[          .          .          .          .          .]

CYTH1A_N1379_A      TGGTGAAAAAG GACGATCTGG TTGCTGATAA GGTAACAAAAA A-TGACTCTT [49]
CYTH2A_N1378_A      ..... [49]
CYTH3A_N1051_A      ..... [49]
ROS1A_C811_1        ..... [49]
ROS1B_C811_2        ..... [49]
ROS2A_C544_1        ..... [49]
ROS2B_C544_2        .....A..... [50]
ROS3A_C1652_A       ..... [49]
ROS4A_C841_A        ..... [49]
MELCO1A_C421_A      ..... [49]
MELCO2A_C422_A      ..... [49]
MELCO3A_C11_A       ..... [49]
MELCO4A_C12_A       ..... [49]
MELTT1A_TT03_A      .....A..... [50]
MELTT2A_TT04_A      .....A..... [50]
MELTT3A_TT14_A      .....A..... [50]
MELFG1A_C436_1      .....A..... [50]
MELFG1B_C436_2      .....T.....A..... [50]
MELFG2A_C437_1      .....A..... [50]
MELFG2B_C437_2      .....A..... [50]
MELFG3A_C528_A      .....A..... [50]
MELFG4A_C1384_A     .....A.....A..... [50]
THEL1A_FG82_A       .....A..... [50]
THEL1B_FG82_B       .....A..... [50]
THEL2A_FG90_A       .....A..... [50]
THEL3A_FG104_A      .....A..... [50]
THEL3B_FG104_B      .....A..... [50]
THEL4A_FG118_A      .....G.....A..... [50]
THEL4B_FG118_B      .....A..... [50]
MAL1A_N4026_A       .....T.....A.....--..... [48]

```

|                 |            |           |       |       |             |      |
|-----------------|------------|-----------|-------|-------|-------------|------|
| AGLA1A_JM494_A  | .....      | .....     | ..... | ..... | .A.....     | [50] |
| AGLA1B_JM494_B  | .....      | .T.....   | ..... | ..... | ..A.....    | [48] |
| AGLA2A_JM1174_A | .....      | .T.....   | ..... | ..... | ..A.....    | [48] |
| AGLA2B_JM1174_B | .....      | .T.....   | ..... | ..... | ..A.....    | [48] |
| AGLA1A_JM1178_A | .....      | C.T.....  | ..... | ..... | ..A.....    | [48] |
| AMAR2A_JM1917_A | .....      | .T.G..... | ..... | ..... | ..A.....    | [48] |
| AMAR2B_JM1917_B | .....      | .T.....   | ..... | ..... | ..A.....    | [48] |
| AMAR3A_JM1271_A | .....      | .T.....   | ..... | ..... | ..A.....    | [48] |
| ECUA1A_C428_A   | .....      | .T.....   | ..... | ..... | ..A.....    | [48] |
| ECUA2A_C2417_A  | .....      | .T.G..... | ..... | ..... | ..A.....    | [48] |
| PLES1A_N14_A    | .....      | .T.....   | ..... | ..... | ..A.....    | [48] |
| PLES3A_C2429_A  | .....      | .T.....   | ..... | ..... | ..A.....    | [48] |
| CYDNO1A_553_1   | ?????????? | ???       | ..... | ..... | ..A.....    | [49] |
| CYDNO1B_553_2   | ?????????? | ???       | ..... | ..... | ..A.....    | [48] |
| CYDNO2A_570_1   | .....      | .....     | ..... | ..... | ..A.....    | [49] |
| CYDNO4A_N1047_A | .....      | .....     | ..... | ..... | ..A.....    | [48] |
| CYDNO4B_N1047_B | .....      | .....     | ..... | ..... | ..A.....    | [48] |
| CYDNO3A_P40_A   | .....      | .....     | ..... | ..... | ..A.....T.. | [48] |
| CYDNO3B_P40_B   | .....      | .....     | ..... | ..... | ..A.....    | [49] |
| HHECALE_Y5_A    | .....      | .....     | ..... | ..... | ..A.....    | [48] |

|   |    |    |    |    |      |
|---|----|----|----|----|------|
| [ | 60 | 70 | 80 | 90 | 100] |
| [ | .  | .  | .  | .  | .]   |

|                 |            |            |            |            |             |      |
|-----------------|------------|------------|------------|------------|-------------|------|
| CYTH1A_N1379_A  | TATACAATAC | AGTAAGAGAA | ATATTTGCAT | AATCAAATCA | TAGGTTTCAGC | [99] |
| CYTH2A_N1378_A  | .....      | .....      | .....      | .....      | .....       | [99] |
| CYTH3A_N1051_A  | .....      | .....      | .....      | .....      | .....       | [99] |
| ROS1A_C811_1    | .....      | .....      | .....      | T.....     | .....       | [99] |
| ROS1B_C811_2    | .....      | .....      | .....      | .....      | .....       | [99] |
| ROS2A_C544_1    | .....      | .....      | .....      | .....      | .....       | [99] |
| ROS2B_C544_2    | .....      | .....      | .....      | .....      | .....       | [99] |
| [100]           | .....      | .....      | .....      | .....      | .....       |      |
| ROS3A_C1652_A   | .....      | .....      | .....      | .....      | .....       | [99] |
| ROS4A_C841_A    | .....      | .....      | .....      | .....      | .....       | [99] |
| MELCO1A_C421_A  | .....      | .....      | .....      | .....      | .....       | [99] |
| MELCO2A_C422_A  | .....      | .....      | .....      | .....      | .....       | [99] |
| MELCO3A_C11_A   | .....      | .....      | .....      | .....      | .....       | [99] |
| MELCO4A_C12_A   | .....      | .....      | .....      | .....      | .....       | [99] |
| MELTT1A_TT03_A  | .....      | .....      | .....      | .....      | .....       | [99] |
| [100]           | .....      | .....      | .....      | .....      | .....       |      |
| MELTT2A_TT04_A  | .....      | .....      | .....      | .....      | .....       | [99] |
| [100]           | .....      | .....      | .....      | .....      | .....       |      |
| MELTT3A_TT14_A  | .....      | .....      | .....      | .....      | .....       | [99] |
| [100]           | .....      | .....      | .....      | .....      | .....       |      |
| MELFG1A_C436_1  | .....      | .....      | .....      | .....      | .....       | [99] |
| [100]           | .....      | .....      | .....      | .....      | .....       |      |
| MELFG1B_C436_2  | .....      | .....      | .....      | .....      | .....       | [99] |
| [100]           | .....      | .....      | .....      | .....      | .....       |      |
| MELFG2A_C437_1  | .....      | .....      | .....      | .....      | .....       | [99] |
| [100]           | .....      | .....      | .....      | .....      | .....       |      |
| MELFG2B_C437_2  | .....      | .....      | .....      | .....      | .....       | [99] |
| [100]           | .....      | .....      | .....      | .....      | .....       |      |
| MELFG3A_C528_A  | .....      | .....      | .....      | .....      | .....       | [99] |
| [100]           | .....      | .....      | .....      | .....      | .....       |      |
| MELFG4A_C1384_A | .....      | .....      | .....      | .....      | .....       | [99] |
| [100]           | .....      | .....      | .....      | .....      | .....       |      |
| THEL1A_FG82_A   | .....      | .....      | .....      | .....      | .....       | [99] |
| [100]           | .....      | .....      | .....      | .....      | .....       |      |
| THEL1B_FG82_B   | .....      | .....      | .....      | .....      | .....       | [99] |
| [100]           | .....      | .....      | .....      | .....      | .....       |      |
| THEL2A_FG90_A   | .....      | .....      | .....      | .....      | .....       | [99] |
| [100]           | .....      | .....      | .....      | .....      | .....       |      |
| THEL3A_FG104_A  | .....      | .....      | .....      | .....      | .....       | [99] |
| [100]           | .....      | .....      | .....      | .....      | .....       |      |
| THEL3B_FG104_B  | .....      | .....      | .....      | .....      | .....       | [99] |
| [100]           | .....      | .....      | .....      | .....      | .....       |      |
| THEL4A_FG118_A  | .....      | .....      | .....      | .....      | .....       | [99] |
| [100]           | .....      | .....      | .....      | .....      | .....       |      |
| THEL4B_FG118_B  | .....      | .....      | .....      | .....      | .....       | [99] |
| [100]           | .....      | .....      | .....      | .....      | .....       |      |
| MAL1A_N4026_A   | .....      | .....      | .....      | .....      | .....       | [98] |

|                 |       |          |       |        |         |      |
|-----------------|-------|----------|-------|--------|---------|------|
| AGLA1A_JM494_A  | ..... | .....    | ..... | .....  | .....   |      |
| [100]           |       |          |       |        |         |      |
| AGLA1B_JM494_B  | ..... | .T.....  | ..... | .....  | .....   | [98] |
| AGLA2A_JM1174_A | ..... | G.....   | ..... | .....  | .....   | [98] |
| AGLA2B_JM1174_B | ..... | .T.....  | ..... | .....  | .....   | [98] |
| AGLA1A_JM1178_A | ..... | .....    | ..... | .....  | .....   | [98] |
| AMAR2A_JM1917_A | ..... | .....    | ..... | A..... | .....   | [98] |
| AMAR2B_JM1917_B | ..... | .T.....  | ..... | .....  | .....   | [98] |
| AMAR3A_JM1271_A | ..... | .T.....  | ..... | .....  | .....   | [98] |
| ECUA1A_C428_A   | ..... | .T.....  | ..... | .....  | .....   | [98] |
| ECUA2A_C2417_A  | ..... | .T.....  | ..... | .....  | .....   | [98] |
| PLES1A_N14_A    | ..... | .?.....? | ..... | .....  | .....   | [98] |
| PLES3A_C2429_A  | ..... | .T.....  | ..... | .....  | .....   | [98] |
| CYDNO1A_553_1   | ..... | .G.....  | ..... | C..... | .G..... | [99] |
| CYDNO1B_553_2   | ..... | .G.....  | ..... | C..... | .G..... | [98] |
| CYDNO2A_570_1   | ..... | .G.....  | ..... | T..... | .....   | [99] |
| CYDNO4A_N1047_A | ..... | .G.....  | ..... | T..... | .....   | [98] |
| CYDNO4B_N1047_B | ..... | .G.....  | ..... | .....  | T.....  | [98] |
| CYDNO3A_P40_A   | ..... | .G.....  | ..... | T..... | .....   | [98] |
| CYDNO3B_P40_B   | ..... | .G.....  | ..... | C..... | .G..... | [99] |
| HHECALE_Y5_A    | ..... | .G.....  | ..... | .....  | .....   | [98] |

|   |     |     |     |     |      |
|---|-----|-----|-----|-----|------|
| [ | 110 | 120 | 130 | 140 | 150] |
| [ | .   | .   | .   | .   | .]   |

|                 |            |             |             |             |            |
|-----------------|------------|-------------|-------------|-------------|------------|
| CYTH1A_N1379_A  | CATACATATA | TCTCCATAGA  | GAAATAGGAC  | ATGGGGATTA  | ACA-GTCTTG |
| [148]           |            |             |             |             |            |
| CYTH2A_N1378_A  | .....      | .....       | .....       | .....       | .....-     |
| [148]           |            |             |             |             |            |
| CYTH3A_N1051_A  | .....      | .....       | .....       | .....       | .....-     |
| [148]           |            |             |             |             |            |
| ROS1A_C811_1    | .....      | .....       | .....       | .....       | .....-     |
| [148]           |            |             |             |             |            |
| ROS1B_C811_2    | .....      | .....T..... | .....       | .....       | .....-     |
| [148]           |            |             |             |             |            |
| ROS2A_C544_1    | .....      | .....       | .....       | .....       | .....-     |
| [148]           |            |             |             |             |            |
| ROS2B_C544_2    | .....      | .....T..... | .....       | .....A..... | .....-     |
| [149]           |            |             |             |             |            |
| ROS3A_C1652_A   | .....      | .....       | .....T..... | .....       | .....-     |
| [148]           |            |             |             |             |            |
| ROS4A_C841_A    | .....      | .....       | .....       | .....       | .....-     |
| [148]           |            |             |             |             |            |
| MELCO1A_C421_A  | .....      | .....       | .....       | .....       | .....-     |
| [148]           |            |             |             |             |            |
| MELCO2A_C422_A  | .....      | .....T..... | .....       | .....       | .....-     |
| [148]           |            |             |             |             |            |
| MELCO3A_C11_A   | .....      | .....T..... | .....       | .....       | .....-     |
| [148]           |            |             |             |             |            |
| MELCO4A_C12_A   | .....      | .....T..... | .....       | .....       | .....-     |
| [148]           |            |             |             |             |            |
| MELTT1A_TT03_A  | ...G.....  | .....T..... | .....       | .....       | ...C-..... |
| [149]           |            |             |             |             |            |
| MELTT2A_TT04_A  | ...G.....  | .....T..... | .....       | .....       | ...C-..... |
| [149]           |            |             |             |             |            |
| MELTT3A_TT14_A  | ...G.....  | .....T..... | .....       | .....       | ...C-..... |
| [149]           |            |             |             |             |            |
| MELFG1A_C436_1  | ...G.....  | .....T..... | .....       | .....       | ...C-..... |
| [149]           |            |             |             |             |            |
| MELFG1B_C436_2  | ...G.....  | .....T..... | .....T..... | .....       | ...C-..... |
| [149]           |            |             |             |             |            |
| MELFG2A_C437_1  | ...G.....  | .....T..... | .....       | .....       | ...C-..... |
| [149]           |            |             |             |             |            |
| MELFG2B_C437_2  | .....      | .....       | .....       | .....       | .....-     |
| [149]           |            |             |             |             |            |
| MELFG3A_C528_A  | ...G.....  | .....T..... | .....       | .....       | ...C-..... |
| [149]           |            |             |             |             |            |
| MELFG4A_C1384_A | ...G.....  | .....T..... | .....       | .....       | ...C-..... |
| [149]           |            |             |             |             |            |
| THEL1A_FG82_A   | ...G.....  | .....T..... | .....       | .....       | ...C-..... |
| [149]           |            |             |             |             |            |



```

THEL1B_FG82_B      ...G.....T.....C-.....
[149]
THEL2A_FG90_A     ...G.....T.....C-.....
[149]
THEL3A_FG104_A    ...G.....T.....C-.....
[149]
THEL3B_FG104_B    ...G.....T.....C-.....
[149]
THEL4A_FG118_A    .....-.....
[149]
THEL4B_FG118_B    ...G.....T.....C-.....
[149]
MAL1A_N4026_A     .....T.....
[148]
AGLA1A_JM494_A    .....T.....C..-.....
[149]
AGLA1B_JM494_B    .....T.....
[148]
AGLA2A_JM1174_A   .....T.....A
[148]
AGLA2B_JM1174_B   .....G.....T.....
[148]
AGLA1A_JM1178_A   .....A.....T.....
[148]
AMAR2A_JM1917_A   .....T.....
[148]
AMAR2B_JM1917_B   .....T.....
[148]
AMAR3A_JM1271_A   .....T.....
[148]
ECUA1A_C428_A     .....T.....
[148]
ECUA2A_C2417_A    .....T.....A.....-.....
[147]
PLES1A_N14_A      .....T.....
[148]
PLES3A_C2429_A    .....T.....
[148]
CYDNO1A_553_1     .....T.....-.....
[148]
CYDNO1B_553_2     .....-.....
[147]
CYDNO2A_570_1     .....-.....
[148]
CYDNO4A_N1047_A   .....-.....
[147]
CYDNO4B_N1047_B   ...G.....-.....
[147]
CYDNO3A_P40_A     .....-.....
[147]
CYDNO3B_P40_B     .....-.....A
[148]
HHECALE_Y5_A      .....C.....-.....
[147]

```

```

[           160           170           180           190           200]
[           .           .           .           .           .]

```

```

CYTH1A_N1379_A    GACACATACT TTTT-ATCT ATTGTTTCATT AGATTGAAAC TCTTATTAAT
[197]
CYTH2A_N1378_A    .....-.....
[197]
CYTH3A_N1051_A    .....-.....
[197]
ROS1A_C811_1      .....-.....
[197]
ROS1B_C811_2      .....-.....
[197]
ROS2A_C544_1      .....-.....
[197]
ROS2B_C544_2      .....CC.....-.....
[196]

```

ROS3A\_C1652\_A ..... A.....  
 [197]  
 ROS4A\_C841\_A .....  
 [197]  
 MELCO1A\_C421\_A .....  
 [197]  
 MELCO2A\_C422\_A .....  
 [197]  
 MELCO3A\_C11\_A .....  
 [197]  
 MELCO4A\_C12\_A ..... C.....  
 [197]  
 MELTT1A\_TT03\_A .....  
 [198]  
 MELTT2A\_TT04\_A .....  
 [198]  
 MELTT3A\_TT14\_A .....  
 [198]  
 MELFG1A\_C436\_1 ..... T.....  
 [198]  
 MELFG1B\_C436\_2 .....  
 [198]  
 MELFG2A\_C437\_1 .....  
 [198]  
 MELFG2B\_C437\_2 .....  
 [198]  
 MELFG3A\_C528\_A ..... ?.....  
 [198]  
 MELFG4A\_C1384\_A .....  
 [198]  
 THEL1A\_FG82\_A .....  
 [198]  
 THEL1B\_FG82\_B ..... C.....  
 [198]  
 THEL2A\_FG90\_A ..... T.....  
 [198]  
 THEL3A\_FG104\_A .....  
 [198]  
 THEL3B\_FG104\_B ..... T.....  
 [198]  
 THEL4A\_FG118\_A .....  
 [198]  
 THEL4B\_FG118\_B .....  
 [198]  
 MAL1A\_N4026\_A ..... T.....  
 [198]  
 AGLA1A\_JM494\_A ..... ..  
 [196]  
 AGLA1B\_JM494\_B .....  
 [197]  
 AGLA2A\_JM1174\_A .G..... T.....  
 [198]  
 AGLA2B\_JM1174\_B ..... T...C.....  
 [198]  
 AGLA1A\_JM1178\_A ..... T.....  
 [198]  
 AMAR2A\_JM1917\_A ..... T..... C.....  
 [198]  
 AMAR2B\_JM1917\_B ..... T...C.....  
 [198]  
 AMAR3A\_JM1271\_A ..... T.....  
 [198]  
 ECUA1A\_C428\_A ..... T.....  
 [198]  
 ECUA2A\_C2417\_A ..... A..... A.A.....  
 [175]  
 PLES1A\_N14\_A ..... T.....  
 [198]  
 PLES3A\_C2429\_A ..... T.....  
 [198]  
 CYDNO1A\_553\_1 .....  
 [197]

CYDNO1B\_553\_2 .....  
 [196]  
 CYDNO2A\_570\_1 .....  
 [197]  
 CYDNO4A\_N1047\_A .....T. ....-.....  
 [195]  
 CYDNO4B\_N1047\_B .....  
 [195]  
 CYDNO3A\_P40\_A .....T. ....-.....  
 [196]  
 CYDNO3B\_P40\_B .....  
 [197]  
 HHECALE\_Y5\_A .....T. ....G. ....T. ....  
 [196]

[ 210 220 230 240 250 ]  
 [ . . . . . ]

CYTH1A\_N1379\_A ATTGTATATT TCTTACATAG AAAGGACAAC AT-----G CATACATTTA  
 [240]  
 CYTH2A\_N1378\_A .....  
 [240]  
 CYTH3A\_N1051\_A .....  
 [240]  
 ROS1A\_C811\_1 .....  
 [240]  
 ROS1B\_C811\_2 .....  
 [240]  
 ROS2A\_C544\_1 .....  
 [240]  
 ROS2B\_C544\_2 .....  
 [239]  
 ROS3A\_C1652\_A .....  
 [240]  
 ROS4A\_C841\_A .....  
 [240]  
 MELCO1A\_C421\_A .....  
 [240]  
 MELCO2A\_C422\_A .....  
 [240]  
 MELCO3A\_C11\_A .....  
 [240]  
 MELCO4A\_C12\_A .....  
 [240]  
 MELTT1A\_TT03\_A .....CAATGTAT. ...C...  
 [247]  
 MELTT2A\_TT04\_A .....CAATGTAT. ...C...  
 [247]  
 MELTT3A\_TT14\_A .....CAATGTAT. ...C...  
 [247]  
 MELFG1A\_C436\_1 .....CAATGTAT. ...C...  
 [247]  
 MELFG1B\_C436\_2 .....CAATGTAT. ...C...  
 [247]  
 MELFG2A\_C437\_1 .....CAATGTAT. ...C...  
 [247]  
 MELFG2B\_C437\_2 .....  
 [241]  
 MELFG3A\_C528\_A .....CAATGTAT. ...C...  
 [247]  
 MELFG4A\_C1384\_A .....CAATGTAT. ...C...  
 [247]  
 THEL1A\_FG82\_A .....CAATGTAT. ...C...  
 [247]  
 THEL1B\_FG82\_B .....CAATGTAT. ...C...  
 [247]  
 THEL2A\_FG90\_A .....CAATGTAT. ...C...  
 [247]  
 THEL3A\_FG104\_A .....CAATGTAT. ...C...  
 [247]  
 THEL3B\_FG104\_B .....CAATGTAT. ...C...  
 [247]

```

THEL4A_FG118_A .....-.....
[241]
THEL4B_FG118_B .....CAATGTAT...-...C...
[247]
MAL1A_N4026_A .....-.....G.-.....
[214]
AGLA1A_JM494_A .....-.....
[238]
AGLA1B_JM494_B .....-.....G.-.....
[213]
AGLA2A_JM1174_A .....A...-.....G.-.....
[214]
AGLA2B_JM1174_B .....-.....G.-.....
[214]
AGLA1A_JM1178_A .....-.....G.-.....
[214]
AMAR2A_JM1917_A .....-.....G.-.....
[214]
AMAR2B_JM1917_B .....-.....G.-.....
[214]
AMAR3A_JM1271_A .....-.....
[241]
ECUA1A_C428_A .....-.....G.-.....
[214]
ECUA2A_C2417_A .....-.....
[218]
PLES1A_N14_A .....-.....G.-.....
[214]
PLES3A_C2429_A .....-.....G.-.....
[214]
CYDNO1A_553_1 G.....TC.....-.....
[240]
CYDNO1B_553_2 G.....-.....
[239]
CYDNO2A_570_1 G.....-.....
[240]
CYDNO4A_N1047_A G.....-.....
[238]
CYDNO4B_N1047_B G.....-.....
[238]
CYDNO3A_P40_A G.....-.....
[239]
CYDNO3B_P40_B G.....-.....
[240]
HHECALE_Y5_A G.....-.....
[239]

[                260                270                280                290                300]
[                .                .                .                .                .]

CYTH1A_N1379_A GACAATTTTA ATTAAGATTG CACTTTTACA CAGCAAAGTT AAATTTAGTG
[290]
CYTH2A_N1378_A .....
[290]
CYTH3A_N1051_A .....
[290]
ROS1A_C811_1 .....
[290]
ROS1B_C811_2 .....C.....
[290]
ROS2A_C544_1 .....
[290]
ROS2B_C544_2 .....C.....
[289]
ROS3A_C1652_A .....
[290]
ROS4A_C841_A .....
[290]
MELCO1A_C421_A .....
[290]
MELCO2A_C422_A .....C.....
[290]

```

|                 |              |
|-----------------|--------------|
| MELCO3A_C11_A   | .....C ..... |
| [290]           |              |
| MELCO4A_C12_A   | .....C ..... |
| [290]           |              |
| MELTT1A_TT03_A  | .....        |
| [297]           |              |
| MELTT2A_TT04_A  | .....        |
| [297]           |              |
| MELTT3A_TT14_A  | .....        |
| [297]           |              |
| MELFG1A_C436_1  | .....        |
| [297]           |              |
| MELFG1B_C436_2  | .....        |
| [297]           |              |
| MELFG2A_C437_1  | .....        |
| [297]           |              |
| MELFG2B_C437_2  | .....C ..... |
| [291]           |              |
| MELFG3A_C528_A  | .....        |
| [297]           |              |
| MELFG4A_C1384_A | .....        |
| [297]           |              |
| THEL1A_FG82_A   | .....C ..... |
| [297]           |              |
| THEL1B_FG82_B   | .....        |
| [297]           |              |
| THEL2A_FG90_A   | .....        |
| [297]           |              |
| THEL3A_FG104_A  | .....        |
| [297]           |              |
| THEL3B_FG104_B  | .....        |
| [297]           |              |
| THEL4A_FG118_A  | .....C ..... |
| [291]           |              |
| THEL4B_FG118_B  | .....        |
| [297]           |              |
| MAL1A_N4026_A   | -----        |
| [251]           |              |
| AGLA1A_JM494_A  | .....C ..... |
| [288]           |              |
| AGLA1B_JM494_B  | -----        |
| [250]           |              |
| AGLA2A_JM1174_A | -----        |
| [251]           |              |
| AGLA2B_JM1174_B | -----        |
| [251]           |              |
| AGLA1A_JM1178_A | -----        |
| [251]           |              |
| AMAR2A_JM1917_A | -----        |
| [251]           |              |
| AMAR2B_JM1917_B | -----        |
| [251]           |              |
| AMAR3A_JM1271_A | .....        |
| [291]           |              |
| ECUA1A_C428_A   | -----        |
| [251]           |              |
| ECUA2A_C2417_A  | .....        |
| [268]           |              |
| PLES1A_N14_A    | -----        |
| [251]           |              |
| PLES3A_C2429_A  | -----        |
| [251]           |              |
| CYDNO1A_553_1   | .....A ..... |
| [290]           |              |
| CYDNO1B_553_2   | .....T ..... |
| [289]           |              |
| CYDNO2A_570_1   | .....        |
| [290]           |              |
| CYDNO4A_N1047_A | .....T ..... |
| [288]           |              |
| CYDNO4B_N1047_B | .....        |
| [288]           |              |

```

CYDNO3A_P40_A ..... T.....
[289]
CYDNO3B_P40_B ..... A.....
[290]
HHECALE_Y5_A ..... A..... C.....
[289]

```

```

[          310          320          330          340          350]
[          .          .          .          .          .]

```

```

CYTH1A_N1379_A TCTAGTATTT TCTATGAATT ATCATACCA- -----
[319]
CYTH2A_N1378_A .....- -----
[319]
CYTH3A_N1051_A .....- -----
[319]
ROS1A_C811_1 .....- -----
[319]
ROS1B_C811_2 ..... T.....- -----
[319]
ROS2A_C544_1 .....- -----
[319]
ROS2B_C544_2 .....- -----
[318]
ROS3A_C1652_A .....- -----
[316]
ROS4A_C841_A .....- -----
[319]
MELCO1A_C421_A .....- -----
[319]
MELCO2A_C422_A ..... T.....- -----
[319]
MELCO3A_C11_A ..... T.....- -----
[319]
MELCO4A_C12_A ..... T.....- -----
[319]
MELTT1A_TT03_A ..... T.....- -----
[326]
MELTT2A_TT04_A ..... T.....- -----
[326]
MELTT3A_TT14_A ..... T.....- -----
[326]
MELFG1A_C436_1 ..... T.....- -----
[326]
MELFG1B_C436_2 ..... T.....- -----
[326]
MELFG2A_C437_1 ..... T.....- -----
[326]
MELFG2B_C437_2 .....- -----
[320]
MELFG3A_C528_A ..... T.....- -----
[326]
MELFG4A_C1384_A ..... T.....- -----
[326]
THEL1A_FG82_A C..... T.....- -----
[326]
THEL1B_FG82_B ..... T.....- -----
[326]
THEL2A_FG90_A ..... T.....- -----
[326]
THEL3A_FG104_A ..... T.....- -----
[326]
THEL3B_FG104_B ..... T.....- -----
[326]
THEL4A_FG118_A .....- -----
[320]
THEL4B_FG118_B ..... T.....- -----
[326]
MAL1A_N4026_A .....- -----
[280]
AGLA1A_JM494_A .....- -----
[317]

```

```

AGLA1B_JM494_B .....C. ....- -----
[ 279]
AGLA2A_JM1174_A .....- -----
[ 280]
AGLA2B_JM1174_B .....- -----
[ 280]
AGLA1A_JM1178_A .....- -----
[ 280]
AMAR2A_JM1917_A .....- -----
[ 280]
AMAR2B_JM1917_B .....- -----
[ 280]
AMAR3A_JM1271_A .....- -----
[ 320]
ECUA1A_C428_A .....- -----
[ 280]
ECUA2A_C2417_A .....- -----
[ 297]
PLES1A_N14_A .....- -----
[ 280]
PLES3A_C2429_A .....C. ....- -----
[ 280]
CYDNO1A_553_1 .....A TT-----
[ 322]
CYDNO1B_553_2 .....A.....- -----
[ 318]
CYDNO2A_570_1 .....A TT-----
[ 322]
CYDNO4A_N1047_A .....A.....- -----
[ 317]
CYDNO4B_N1047_B .....A TT-----
[ 320]
CYDNO3A_P40_A .....CA.....- -----
[ 318]
CYDNO3B_P40_B .....A TT-----
[ 322]
HHECALE_Y5_A .....A TTGTATAAAT AAGTTCACAA
[ 339]

[          360          370          380          390          400]
[          .          .          .          .          .]

CYTH1A_N1379_A -----
[ 319]
CYTH2A_N1378_A -----
[ 319]
CYTH3A_N1051_A -----
[ 319]
ROS1A_C811_1 -----
[ 319]
ROS1B_C811_2 -----
[ 319]
ROS2A_C544_1 -----
[ 319]
ROS2B_C544_2 -----
[ 318]
ROS3A_C1652_A -----
[ 316]
ROS4A_C841_A -----
[ 319]
MELCO1A_C421_A -----
[ 319]
MELCO2A_C422_A -----
[ 319]
MELCO3A_C11_A -----
[ 319]
MELCO4A_C12_A -----
[ 319]
MELTT1A_TT03_A -----
[ 326]
MELTT2A_TT04_A -----
[ 326]

```

|                 |            |            |            |            |            |
|-----------------|------------|------------|------------|------------|------------|
| MELTT3A_TT14_A  | -----      | -----      | -----      | -----      | -----      |
| [ 326]          |            |            |            |            |            |
| MELFG1A_C436_1  | -----      | -----      | -----      | -----      | -----      |
| [ 326]          |            |            |            |            |            |
| MELFG1B_C436_2  | -----      | -----      | -----      | -----      | -----      |
| [ 326]          |            |            |            |            |            |
| MELFG2A_C437_1  | -----      | -----      | -----      | -----      | -----      |
| [ 326]          |            |            |            |            |            |
| MELFG2B_C437_2  | -----      | -----      | -----      | -----      | -----      |
| [ 320]          |            |            |            |            |            |
| MELFG3A_C528_A  | -----      | -----      | -----      | -----      | -----      |
| [ 326]          |            |            |            |            |            |
| MELFG4A_C1384_A | -----      | -----      | -----      | -----      | -----      |
| [ 326]          |            |            |            |            |            |
| THEL1A_FG82_A   | -----      | -----      | -----      | -----      | -----      |
| [ 326]          |            |            |            |            |            |
| THEL1B_FG82_B   | -----      | -----      | -----      | -----      | -----      |
| [ 326]          |            |            |            |            |            |
| THEL2A_FG90_A   | -----      | -----      | -----      | -----      | -----      |
| [ 326]          |            |            |            |            |            |
| THEL3A_FG104_A  | -----      | -----      | -----      | -----      | -----      |
| [ 326]          |            |            |            |            |            |
| THEL3B_FG104_B  | -----      | -----      | -----      | -----      | -----      |
| [ 326]          |            |            |            |            |            |
| THEL4A_FG118_A  | -----      | -----      | -----      | -----      | -----      |
| [ 320]          |            |            |            |            |            |
| THEL4B_FG118_B  | -----      | -----      | -----      | -----      | -----      |
| [ 326]          |            |            |            |            |            |
| MAL1A_N4026_A   | -----      | -----      | -----      | -----      | -----      |
| [ 280]          |            |            |            |            |            |
| AGLA1A_JM494_A  | -----      | -----      | -----      | -----      | -----      |
| [ 317]          |            |            |            |            |            |
| AGLA1B_JM494_B  | -----      | -----      | -----      | -----      | -----      |
| [ 279]          |            |            |            |            |            |
| AGLA2A_JM1174_A | -----      | -----      | -----      | -----      | -----      |
| [ 280]          |            |            |            |            |            |
| AGLA2B_JM1174_B | -----      | -----      | -----      | -----      | -----      |
| [ 280]          |            |            |            |            |            |
| AGLA1A_JM1178_A | -----      | -----      | -----      | -----      | -----      |
| [ 280]          |            |            |            |            |            |
| AMAR2A_JM1917_A | -----      | -----      | -----      | -----      | -----      |
| [ 280]          |            |            |            |            |            |
| AMAR2B_JM1917_B | -----      | -----      | -----      | -----      | -----      |
| [ 280]          |            |            |            |            |            |
| AMAR3A_JM1271_A | -----      | -----      | -----      | -----      | -----      |
| [ 320]          |            |            |            |            |            |
| ECUA1A_C428_A   | -----      | -----      | -----      | -----      | -----      |
| [ 280]          |            |            |            |            |            |
| ECUA2A_C2417_A  | -----      | -----      | -----      | -----      | -----      |
| [ 297]          |            |            |            |            |            |
| PLES1A_N14_A    | -----      | -----      | -----      | -----      | -----      |
| [ 280]          |            |            |            |            |            |
| PLES3A_C2429_A  | -----      | -----      | -----      | -----      | -----      |
| [ 280]          |            |            |            |            |            |
| CYDNO1A_553_1   | -----      | -----      | -----      | -----      | -----      |
| [ 322]          |            |            |            |            |            |
| CYDNO1B_553_2   | -----      | -----      | -----      | -----      | -----      |
| [ 318]          |            |            |            |            |            |
| CYDNO2A_570_1   | -----      | -----      | -----      | -----      | -----      |
| [ 322]          |            |            |            |            |            |
| CYDNO4A_N1047_A | -----      | -----      | -----      | -----      | -----      |
| [ 317]          |            |            |            |            |            |
| CYDNO4B_N1047_B | -----      | -----      | -----      | -----      | -----      |
| [ 320]          |            |            |            |            |            |
| CYDNO3A_P40_A   | -----      | -----      | -----      | -----      | -----      |
| [ 318]          |            |            |            |            |            |
| CYDNO3B_P40_B   | -----      | -----      | -----      | -----      | -----      |
| [ 322]          |            |            |            |            |            |
| HHECALE_Y5_A    | ATACCTTGAA | AATATGCAGA | ATGAATAATG | CAGGTGGGCC | AAGTTAATGT |
| [ 389]          |            |            |            |            |            |

[

410

420

430

440

450]





```

AMAR2A_JM1917_A -----
[291]
AMAR2B_JM1917_B -----
[291]
AMAR3A_JM1271_A -----
[331]
ECUA1A_C428_A -----
[291]
ECUA2A_C2417_A -----
[308]
PLES1A_N14_A -----
[291]
PLES3A_C2429_A -----
[291]
CYDNO1A_553_1 -----GCAATA TTTGCACTGT .T.-G.-..
[346]
CYDNO1B_553_2 -----
[329]
CYDNO2A_570_1 -----GCAATA TTTGCACTGT .T.....
[348]
CYDNO4A_N1047_A -----
[328]
CYDNO4B_N1047_B -----GCAATG TTTGCACTGT .T.....
[346]
CYDNO3A_P40_A -----
[329]
CYDNO3B_P40_B -----GCAATA TTTGCACTGT .T.....
[348]
HHECALE_Y5_A TTAATAAGC AATTGTTAAG TTGGGCAATA TTTGCACTGT .T....T..
[439]

[          460          470          480          490          500]
[          .          .          .          .          .]

```

```

CYTH1A_N1379_A GCATATAATA TTCAAATAA TATGATAAAA ATAAACTGAT ATATTTTCAGG
[380]
CYTH2A_N1378_A .....
[380]
CYTH3A_N1051_A .....
[380]
ROS1A_C811_1 .....
[380]
ROS1B_C811_2 .....
[380]
ROS2A_C544_1 .....
[380]
ROS2B_C544_2 .....
[379]
ROS3A_C1652_A .....
[377]
ROS4A_C841_A .....
[380]
MELCO1A_C421_A .....
[380]
MELCO2A_C422_A .....
[380]
MELCO3A_C11_A .....
[380]
MELCO4A_C12_A .....
[380]
MELTT1A_TT03_A .....
[387]
MELTT2A_TT04_A .....
[387]
MELTT3A_TT14_A .....
[387]
MELFG1A_C436_1 .....C.....
[387]
MELFG1B_C436_2 .....C.....
[387]
MELFG2A_C437_1 .....
[387]

```

```

MELFG2B_C437_2 .....
[381]
MELFG3A_C528_A .....
[387]
MELFG4A_C1384_A .....
[387]
THEL1A_FG82_A .....
[387]
THEL1B_FG82_B .....
[387]
THEL2A_FG90_A .....
[387]
THEL3A_FG104_A .....
[387]
THEL3B_FG104_B .....
[387]
THEL4A_FG118_A .....
[381]
THEL4B_FG118_B .....
[387]
MAL1A_N4026_A .....
[341]
AGLA1A_JM494_A .....
[378]
AGLA1B_JM494_B .....
[340]
AGLA2A_JM1174_A .....
[341]
AGLA2B_JM1174_B .....
[341]
AGLA1A_JM1178_A .....
[341]
AMAR2A_JM1917_A .....
[341]
AMAR2B_JM1917_B .....
[341]
AMAR3A_JM1271_A .....
[381]
ECUA1A_C428_A .....C.....
[341]
ECUA2A_C2417_A .....
[358]
PLES1A_N14_A .....?.....
[341]
PLES3A_C2429_A .....
[341]
CYDNO1A_553_1 .....A.....
[396]
CYDNO1B_553_2 .....T.....A.....
[379]
CYDNO2A_570_1 .....A.....
[398]
CYDNO4A_N1047_A .....T.....
[378]
CYDNO4B_N1047_B .....A.....
[396]
CYDNO3A_P40_A .....T.....
[379]
CYDNO3B_P40_B .....A.....
[398]
HHECALE_Y5_A .....T.....T.....
[489]

[          510          520          530          540          550]
[          .          .          .          .          .]

CYTH1A_N1379_A TGGCCCATGC CCTTGAATGT GGTTTAAAAG TGATTGCCTG TATAGGTGAA
[430]
CYTH2A_N1378_A .....
[430]
CYTH3A_N1051_A .....
[430]

```

|                 |       |        |
|-----------------|-------|--------|
| ROS1A_C811_1    | ..... |        |
| [430]           |       |        |
| ROS1B_C811_2    | ..... |        |
| [430]           |       |        |
| ROS2A_C544_1    | ..... |        |
| [430]           |       |        |
| ROS2B_C544_2    | ..... |        |
| [429]           |       |        |
| ROS3A_C1652_A   | ..... |        |
| [427]           |       |        |
| ROS4A_C841_A    | ..... |        |
| [430]           |       |        |
| MELCO1A_C421_A  | ..... |        |
| [430]           |       |        |
| MELCO2A_C422_A  | ..... |        |
| [430]           |       |        |
| MELCO3A_C11_A   | ..... |        |
| [430]           |       |        |
| MELCO4A_C12_A   | ..... |        |
| [430]           |       |        |
| MELTT1A_TT03_A  | ..... |        |
| [437]           |       |        |
| MELTT2A_TT04_A  | ..... |        |
| [437]           |       |        |
| MELTT3A_TT14_A  | ..... |        |
| [437]           |       |        |
| MELFG1A_C436_1  | ..... |        |
| [437]           |       |        |
| MELFG1B_C436_2  | ..... |        |
| [437]           |       |        |
| MELFG2A_C437_1  | ..... |        |
| [437]           |       |        |
| MELFG2B_C437_2  | ..... |        |
| [431]           |       |        |
| MELFG3A_C528_A  | ..... |        |
| [437]           |       |        |
| MELFG4A_C1384_A | ..... |        |
| [437]           |       |        |
| THEL1A_FG82_A   | ..... | A..... |
| [437]           |       |        |
| THEL1B_FG82_B   | ..... |        |
| [437]           |       |        |
| THEL2A_FG90_A   | ..... |        |
| [437]           |       |        |
| THEL3A_FG104_A  | ..... |        |
| [437]           |       |        |
| THEL3B_FG104_B  | ..... |        |
| [437]           |       |        |
| THEL4A_FG118_A  | ..... |        |
| [431]           |       |        |
| THEL4B_FG118_B  | ..... |        |
| [437]           |       |        |
| MAL1A_N4026_A   | ..... |        |
| [391]           |       |        |
| AGLA1A_JM494_A  | ..... |        |
| [428]           |       |        |
| AGLA1B_JM494_B  | ..... |        |
| [390]           |       |        |
| AGLA2A_JM1174_A | ..... |        |
| [391]           |       |        |
| AGLA2B_JM1174_B | ..... |        |
| [391]           |       |        |
| AGLA1A_JM1178_A | ..... |        |
| [391]           |       |        |
| AMAR2A_JM1917_A | ..... |        |
| [391]           |       |        |
| AMAR2B_JM1917_B | ..... |        |
| [391]           |       |        |
| AMAR3A_JM1271_A | ..... |        |
| [431]           |       |        |
| ECUA1A_C428_A   | ..... |        |
| [391]           |       |        |

ECUA2A\_C2417\_A .....  
 [408]  
 PLES1A\_N14\_A .....  
 [391]  
 PLES3A\_C2429\_A .....  
 [391]  
 CYDNO1A\_553\_1 .....  
 [446]  
 CYDNO1B\_553\_2 .....  
 [429]  
 CYDNO2A\_570\_1 .....  
 [448]  
 CYDNO4A\_N1047\_A .....  
 [428]  
 CYDNO4B\_N1047\_B .....  
 [446]  
 CYDNO3A\_P40\_A .....  
 [429]  
 CYDNO3B\_P40\_B .....  
 [448]  
 HHECALE\_Y5\_A ..... C.....  
 [539]

[ 560 570 580 590 600 ]  
 [ . . . . . ]

CYTH1A\_N1379\_A ACTTTAGAAG AGAGGGAGGC GGGTAAAAC T GAGGAAGTGG TGTTCAGGCA  
 [480]  
 CYTH2A\_N1378\_A .....  
 [480]  
 CYTH3A\_N1051\_A .....  
 [480]  
 ROS1A\_C811\_1 .....  
 [480]  
 ROS1B\_C811\_2 .....  
 [480]  
 ROS2A\_C544\_1 .....  
 [480]  
 ROS2B\_C544\_2 .....  
 [479]  
 ROS3A\_C1652\_A .....  
 [477]  
 ROS4A\_C841\_A .....  
 [480]  
 MELCO1A\_C421\_A .....  
 [480]  
 MELCO2A\_C422\_A .....  
 [480]  
 MELCO3A\_C11\_A .....  
 [480]  
 MELCO4A\_C12\_A .....  
 [480]  
 MELTT1A\_TT03\_A .....  
 [487]  
 MELTT2A\_TT04\_A .....  
 [487]  
 MELTT3A\_TT14\_A .....  
 [487]  
 MELFG1A\_C436\_1 .....  
 [487]  
 MELFG1B\_C436\_2 .....  
 [487]  
 MELFG2A\_C437\_1 ..... A.....  
 [487]  
 MELFG2B\_C437\_2 .....  
 [481]  
 MELFG3A\_C528\_A .....  
 [487]  
 MELFG4A\_C1384\_A ..... A.....  
 [487]  
 THEL1A\_FG82\_A ..... A.....  
 [487]

THEL1B\_FG82\_B .....  
 [487]  
 THEL2A\_FG90\_A .....  
 [487]  
 THEL3A\_FG104\_A .....A.....  
 [487]  
 THEL3B\_FG104\_B .....G.....  
 [487]  
 THEL4A\_FG118\_A .....  
 [481]  
 THEL4B\_FG118\_B .....  
 [487]  
 MAL1A\_N4026\_A .....A.....  
 [441]  
 AGLA1A\_JM494\_A .....  
 [478]  
 AGLA1B\_JM494\_B .....  
 [440]  
 AGLA2A\_JM1174\_A .....  
 [441]  
 AGLA2B\_JM1174\_B .....  
 [441]  
 AGLA1A\_JM1178\_A .....A.....  
 [441]  
 AMAR2A\_JM1917\_A .....A.....  
 [441]  
 AMAR2B\_JM1917\_B .....  
 [441]  
 AMAR3A\_JM1271\_A .....  
 [481]  
 ECUA1A\_C428\_A .....  
 [441]  
 ECUA2A\_C2417\_A .....  
 [458]  
 PLES1A\_N14\_A .....?.....  
 [441]  
 PLES3A\_C2429\_A .....  
 [441]  
 CYDNO1A\_553\_1 .....???? ??????????? ??????????? ???????????  
 [496]  
 CYDNO1B\_553\_2 .....  
 [479]  
 CYDNO2A\_570\_1 .....  
 [498]  
 CYDNO4A\_N1047\_A .....  
 [478]  
 CYDNO4B\_N1047\_B .....  
 [496]  
 CYDNO3A\_P40\_A .....  
 [479]  
 CYDNO3B\_P40\_B .....  
 [498]  
 HHECALE\_Y5\_A .....  
 [589]

[ 610 620 ]  
 [ . . ]

CYTH1A\_N1379\_A AACTAAGGCT CTATTGCCTG CCA [503]  
 CYTH2A\_N1378\_A ..... [503]  
 CYTH3A\_N1051\_A ..... [503]  
 ROS1A\_C811\_1 .....T..... [503]  
 ROS1B\_C811\_2 .....T..... [503]  
 ROS2A\_C544\_1 ..... [503]  
 ROS2B\_C544\_2 ..... [502]  
 ROS3A\_C1652\_A ..... [500]  
 ROS4A\_C841\_A ..... [503]  
 MELCO1A\_C421\_A ..... [503]  
 MELCO2A\_C422\_A ..... [503]  
 MELCO3A\_C11\_A ..... [503]  
 MELCO4A\_C12\_A ..... [503]  
 MELTT1A\_TT03\_A ..... [510]

```

MELTT2A_TT04_A ..... [510]
MELTT3A_TT14_A ..... [510]
MELFG1A_C436_1 ..... [510]
MELFG1B_C436_2 ..... [510]
MELFG2A_C437_1 ..... [510]
MELFG2B_C437_2 ..... [504]
MELFG3A_C528_A ..... [510]
MELFG4A_C1384_A ..... [510]
THEL1A_FG82_A ..... [510]
THEL1B_FG82_B ..... [510]
THEL2A_FG90_A ..... [510]
THEL3A_FG104_A ..... [510]
THEL3B_FG104_B ..... [510]
THEL4A_FG118_A ..... [504]
THEL4B_FG118_B ..... [510]
MAL1A_N4026_A ..... [464]
AGLA1A_JM494_A ..... [501]
AGLA1B_JM494_B ..... [463]
AGLA2A_JM1174_A ..... [464]
AGLA2B_JM1174_B ..... [464]
AGLA1A_JM1178_A ..... [464]
AMAR2A_JM1917_A ..... [464]
AMAR2B_JM1917_B ..... [464]
AMAR3A_JM1271_A ..... [504]
ECUA1A_C428_A ..... [464]
ECUA2A_C2417_A ..... [481]
PLES1A_N14_A ..... [464]
PLES3A_C2429_A ..... [464]
CYDNO1A_553_1 ?????????? ?????????? ??? [519]
CYDNO1B_553_2 ?????????? ?????????? ??? [502]
CYDNO2A_570_1 .....?????? ?????????? ??? [521]
CYDNO4A_N1047_A ..... [501]
CYDNO4B_N1047_B ..... [519]
CYDNO3A_P40_A ..... [502]
CYDNO3B_P40_B ..... [521]
HHECALE_Y5_A ..... [612]
;
END;

BEGIN PAUP;
exclude 41-42 164-166;
Lset Base=(0.3619 0.1454 0.1875) Nst=6 Rmat=(1.0000 2.6018 1.0000 1.0000
5.9283) Rates=equal Pinvar=0.6301;
END;

```
